# Supplementary material for: Widespread impact of horizontal gene transfer on plant colonization of land
Source: PubMed Central journal article supplement — Nat Commun. 2012 Oct 23;3:1152–. doi: 10.1038/ncomms2148 (PMC3493653; doi:10.1038/ncomms2148), 2012-10-23
Supplement: ncomms2148-s1.pdf [file ncomms2148-s1.pdf]

Supplementary Information

For

**Widespread impact of horizontal gene transfer on plant colonization of land**

Jipei Yue<sup>1,2</sup> Xiangyang Hu<sup>1,3</sup> Hang Sun<sup>1</sup> Yongping Yang<sup>1,3</sup> Jinling Huang<sup>2</sup>

<sup>1</sup>Key Laboratory of Biodiversity and Biogeography, Kunming Institute of Botany, Chinese Academy of Sciences, Kunming 650201, China

<sup>2</sup>Department of Biology, East Carolina University, Greenville, NC 27858, USA

<sup>3</sup>Institute of Tibet Plateau Research, Chinese Academy of Sciences, Kunming 650201, China

**Correspondence:** Jinling Huang

Email: [huangj@ecu.edu](mailto:huangj@ecu.edu)

Fax: 252-328-4178

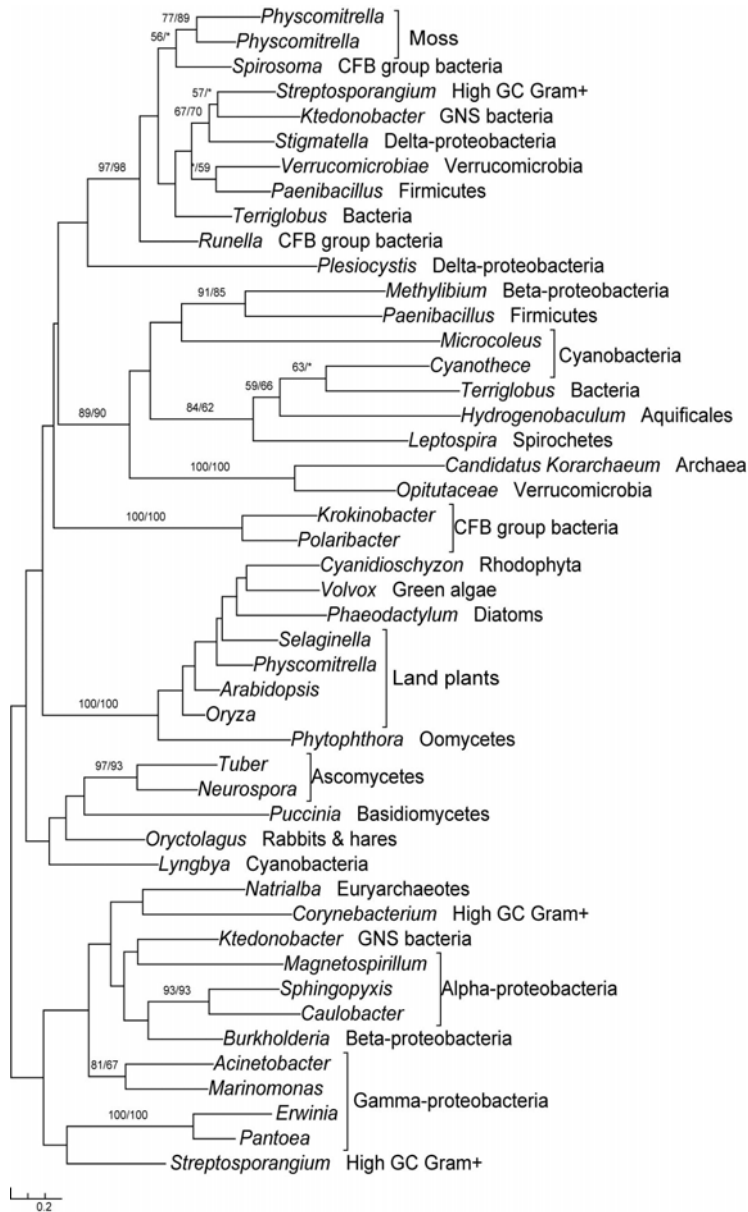

**Supplementary Figure S1.** Molecular phylogeny of FAD linked oxidase. Three copies of this gene exist in *Physcomitrella*, two of which (Genbank GI numbers 168012414, 168045341) group within bacterial sequences (upper part of the tree); the other copy (Genbank GI number 168012432) of this gene is a mitochondrial precursor in several other eukaryotes.

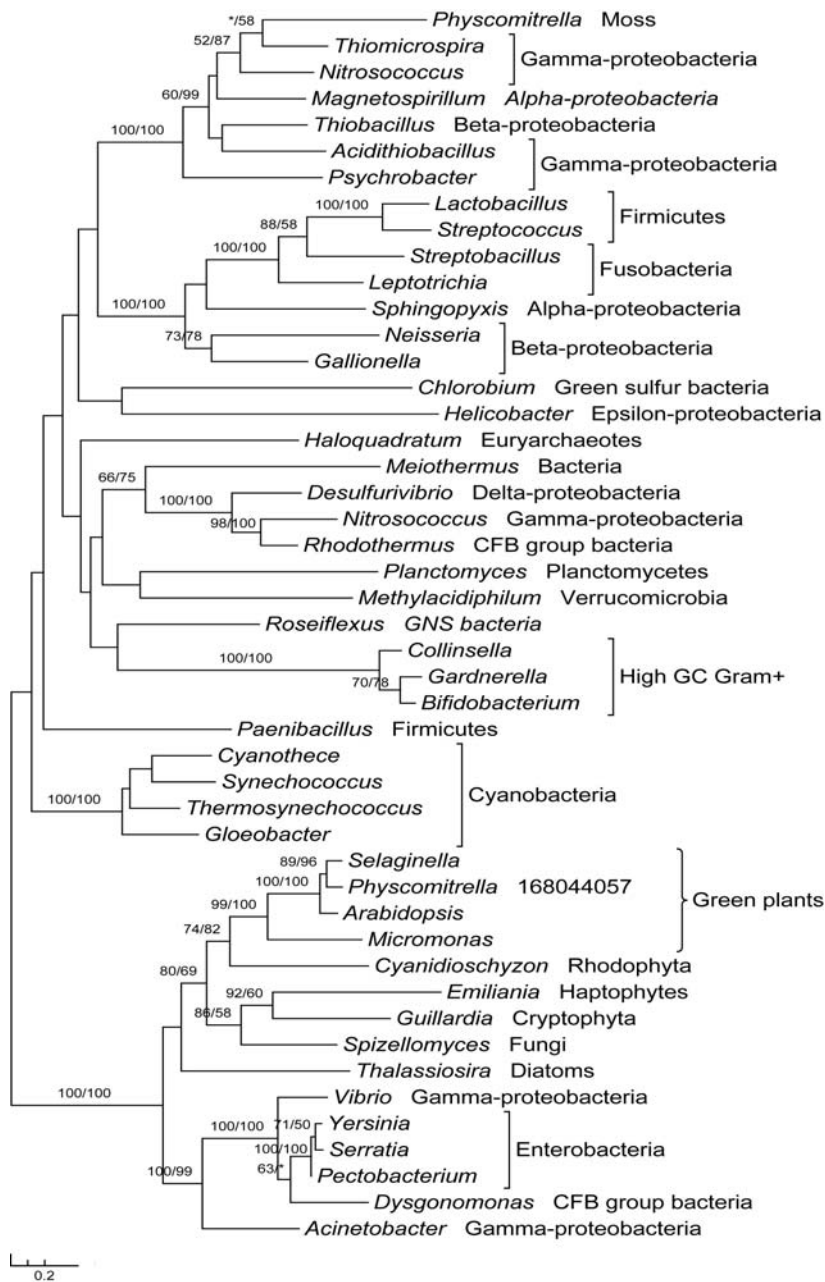

**Supplementary Figure S2. Molecular phylogeny of phosphoenolpyruvate carboxylase (PEPCase).** *Physcomitrella* sequence (Genbank GI number 168029489) forms a highly supported clade with proteobacterial homologs. Another gene copy in *Physcomitrella* (Genbank GI number 168044057) groups with homologs from green plants, red algae and other eukaryotes. In *Arabidopsis*, this copy is annotated as phosphoenolpyruvate carboxylase 2 (ATPPC2) and is targeted to chloroplasts. Some of other eukaryotic sequences are predicted by TargetP to be mitochondrial precursors, indicating likely mitochondrial origin.

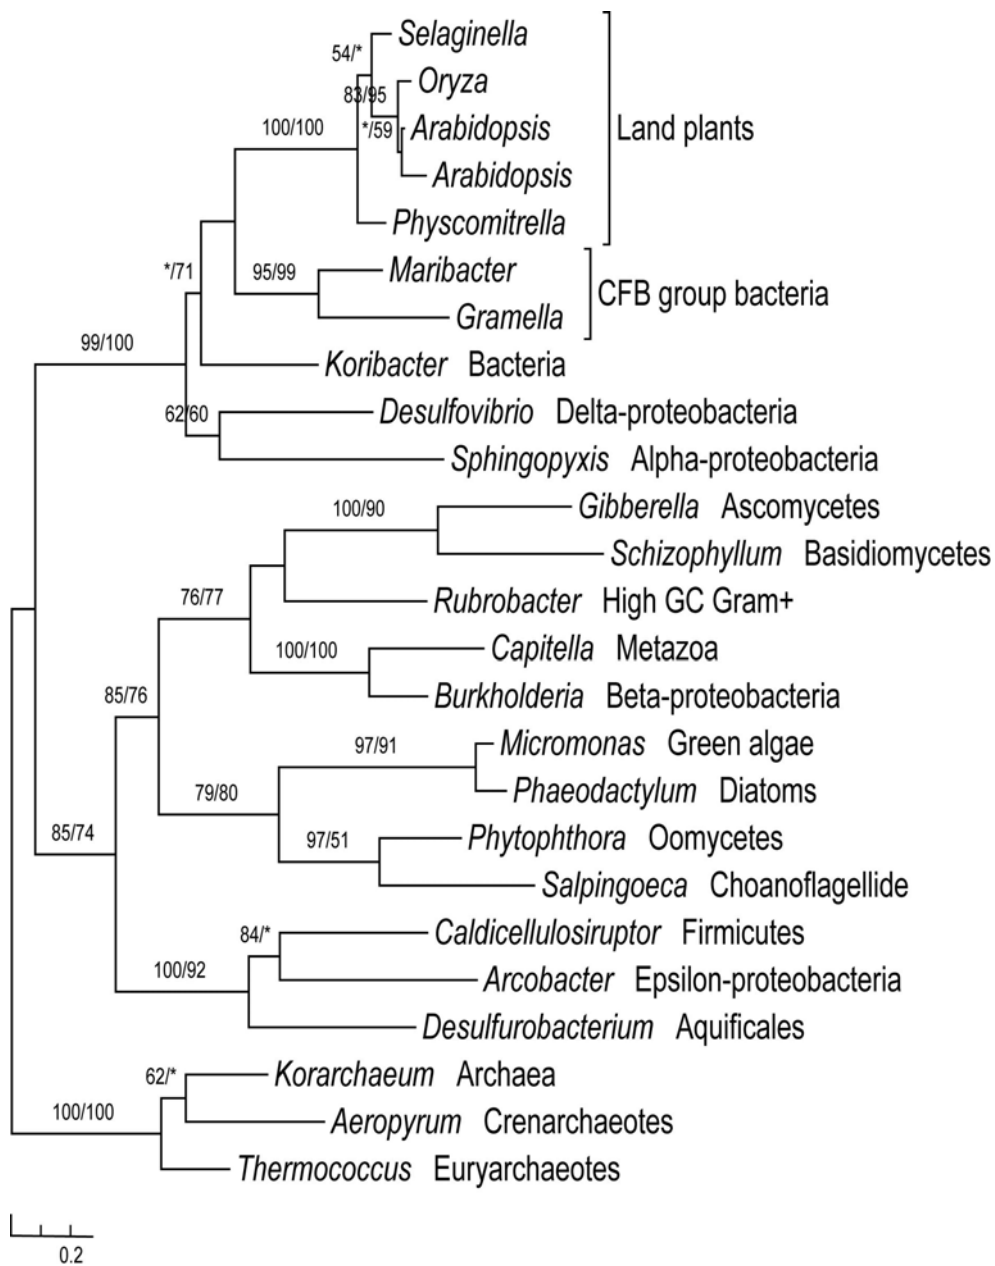

**Supplementary Figure S3. Molecular phylogeny of arginase.** *Physcomitrella* sequence (Genbank GI number 168024860) forms a highly supported clade with homologs from other land plants and bacteria. Their relationship is supported by several conserved amino acid residues and shared indels. Several other eukaryotic sequences form another clade with bacterial homologs. Some of these eukaryotic sequences were predicted by TargetP to be mitochondrial precursors, indicating that they are likely derived from mitochondria.

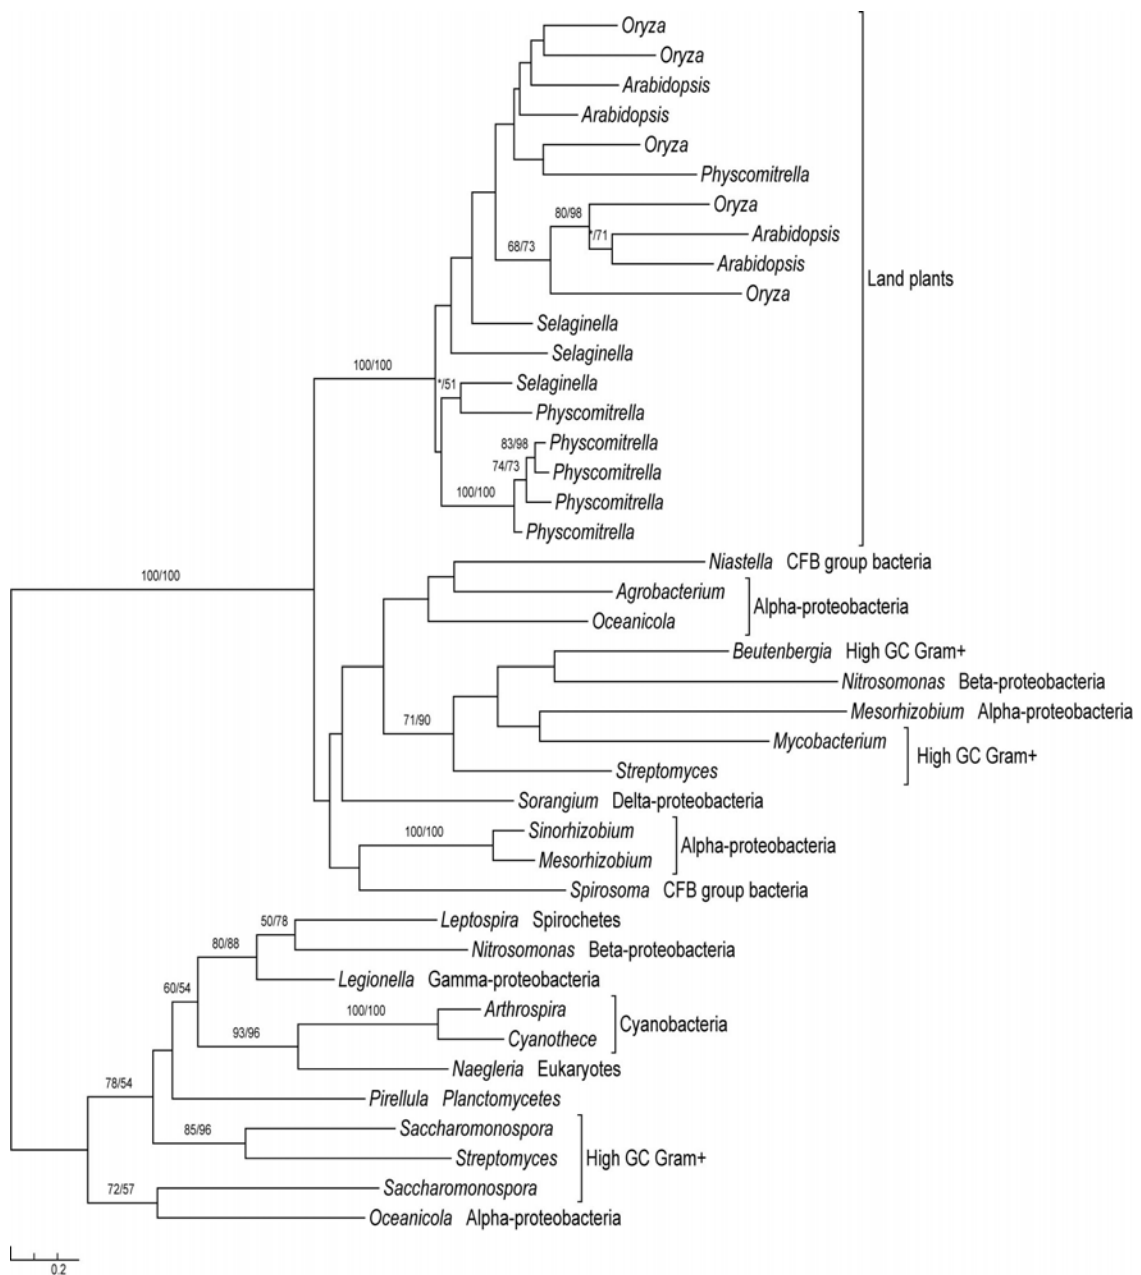

**Supplementary Figure S4. Molecular phylogeny of YUCCA flavin monooxygenase (YUCCA3).** *Physcomitrella* sequences (Genbank GI numbers 168013839, 168007310, 168038243, 168047840, 168059684) form a highly supported clade with other land plant and bacterial homologs. *Naegleria* sequence forms a clade with cyanobacterial homologs, which in turn is related to other bacterial homologs. The relationship of the two major sequence clades depicted in this gene tree is also supported by multiple conserved amino acid residues and shared indels.

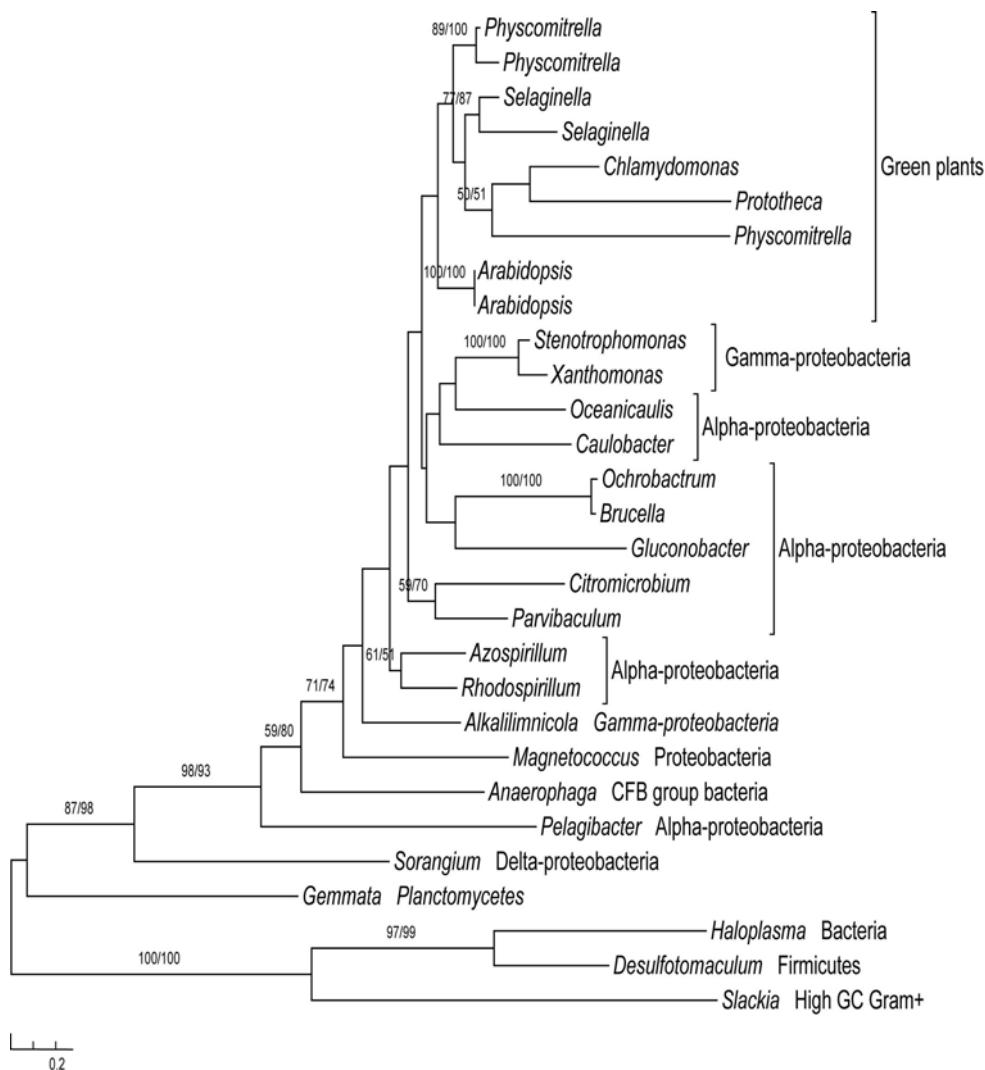

**Supplementary Figure S5. Molecular phylogeny of glutamate-cysteine ligase (GCL).** Identifiable homologs were only found in green plants and bacteria. *Physcomitrella* sequences (Genbank GI numbers 168009654, 168067242, 168052608) form a monophyletic group with green plant and proteobacterial homologs. No cyanobacterial homologs were found, indicating that this gene family in green plants is unlikely of plastid (cyanobacterial) origin.

A

|                       |                                                                       |     |
|-----------------------|-----------------------------------------------------------------------|-----|
| <i>Physcomitrella</i> | G F I D T H I H F P Q T Q V I A S - Y G T Q L L D W L T R Y T F V E E | 107 |
| <i>Azospirillum</i>   | G F I D T H I H F P Q T Q V I A S - Y G A Q L M E W L E K Y T F I E E | 108 |
| <i>Rhizobium</i>      | G F I D M H L H F P Q M Q V I A S - Y A A N L L E W L N T Y T F P E E | 104 |
| <i>Sinorhizobium</i>  | G F I D T H L H F P Q M Q V M A S - Y A A N L L E W L N S Y T F P E E | 104 |
| <i>Brucella</i>       | G F I D T H I H Y P Q T Q V V A S - Y A A N L L E W L N T Y T F V A E | 104 |
| <i>Trichomonas</i>    | G L I D C H I H A P Q Y V F A G C G F D L P L L E W L N T Y T F P A E | 92  |
| <i>Ectocarpus</i>     | G F I D G H A H A P Q Y V Y R G T G M D L P L L Q W L E T H T F P V E | 105 |
| <i>Dictyostelium</i>  | G F I D T H A H A P Q Y H N A G T G T D L P L L K W L E K Y T F P V E | 113 |
| <i>Volvox</i>         | G F I D T H V H A P Q Y K F T G T G T D V P L M E W L R K Y T F P A E | 98  |
| <i>Laccaria</i>       | G F V D T H T H A P Q V P N M G V G Q Q Y E L L D W L E K V T F P T E | 109 |
| <i>Metarhizium</i>    | G F V D T H H H A P Q W L H R G Q G Q G L H I L E W L D Q V A F P N E | 111 |
| <i>Sebaldella</i>     | G F V D I H L H A P Q F E N L G L G Y D N E L L P W L E N Y T F P E E | 97  |
| <i>Guillardia</i>     | G F I D T H I H A P Q Y S Y T G T A T D L P L M D W L Q K Y T F P A E | 48  |
| <i>Phytophthora</i>   | G F V D T H V H A P Q F V F M G T A T D E P L M R W L D K Y T F P V E | 110 |
| <i>Pseudomonas</i>    | G F I D T H I H F P Q T G M I G S - Y G E Q L L D W L N T Y T F P C E | 106 |
| <i>Marinobacter</i>   | G F V D T H I H Y P Q V G I I G S - Y G A Q L L D W L E T Y T F P C E | 105 |
| <i>Caulobacter</i>    | G F V D T H I H F P Q V D V I A A - H G K Q L L D W L E Q H T F P A E | 100 |
| <i>Streptomyces</i>   | G F V D T H V H Y V Q T G I I A A - F G S Q L I D W L N H Y T F V E E | 108 |
| <i>Desulfovibrio</i>  | G F I D G H I H F P Q T R V L G A - Y G N Q L L D W L Q N S I F L E E | 107 |
| <i>Burkholderia</i>   | G F I D T H I H Y P Q T D M I A S - P A P G L L P W L D T Y T F P T E | 199 |

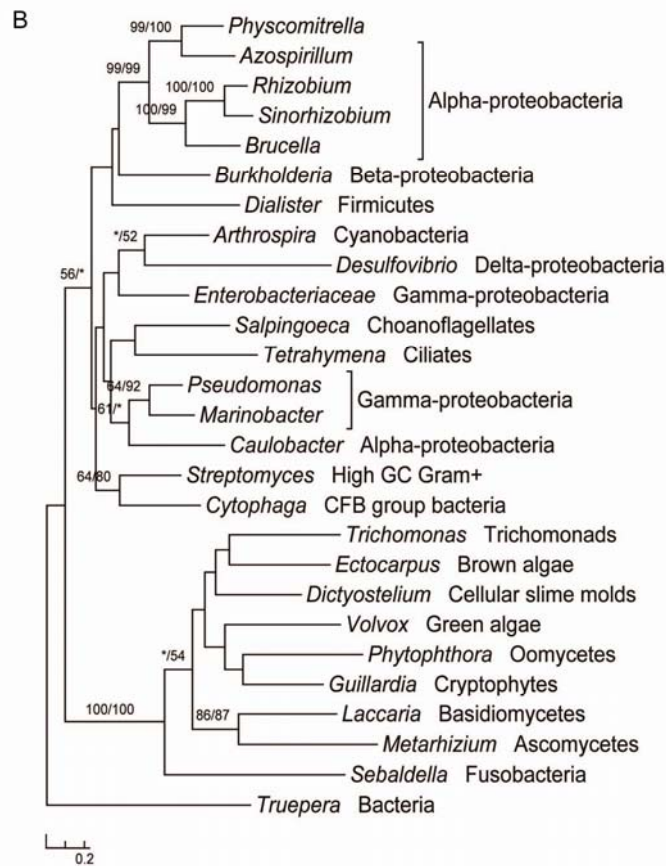

**Supplementary Figure S6. Multiple protein sequence alignment (A) and molecular phylogeny of guanine deaminase (B).** *Physcomitrella* sequence (Genbank GI number 168025229) has 55-68% identity with alpha-proteobacterial homologs. Several other eukaryotic sequences group with bacterial homologs. Some of these eukaryotic sequences are predicted by TargetP to be mitochondrial precursors, indicating likely mitochondrial origin. The highly supported clades on the phylogenetic tree are also supported by several conserved amino acid residues and shared indels.

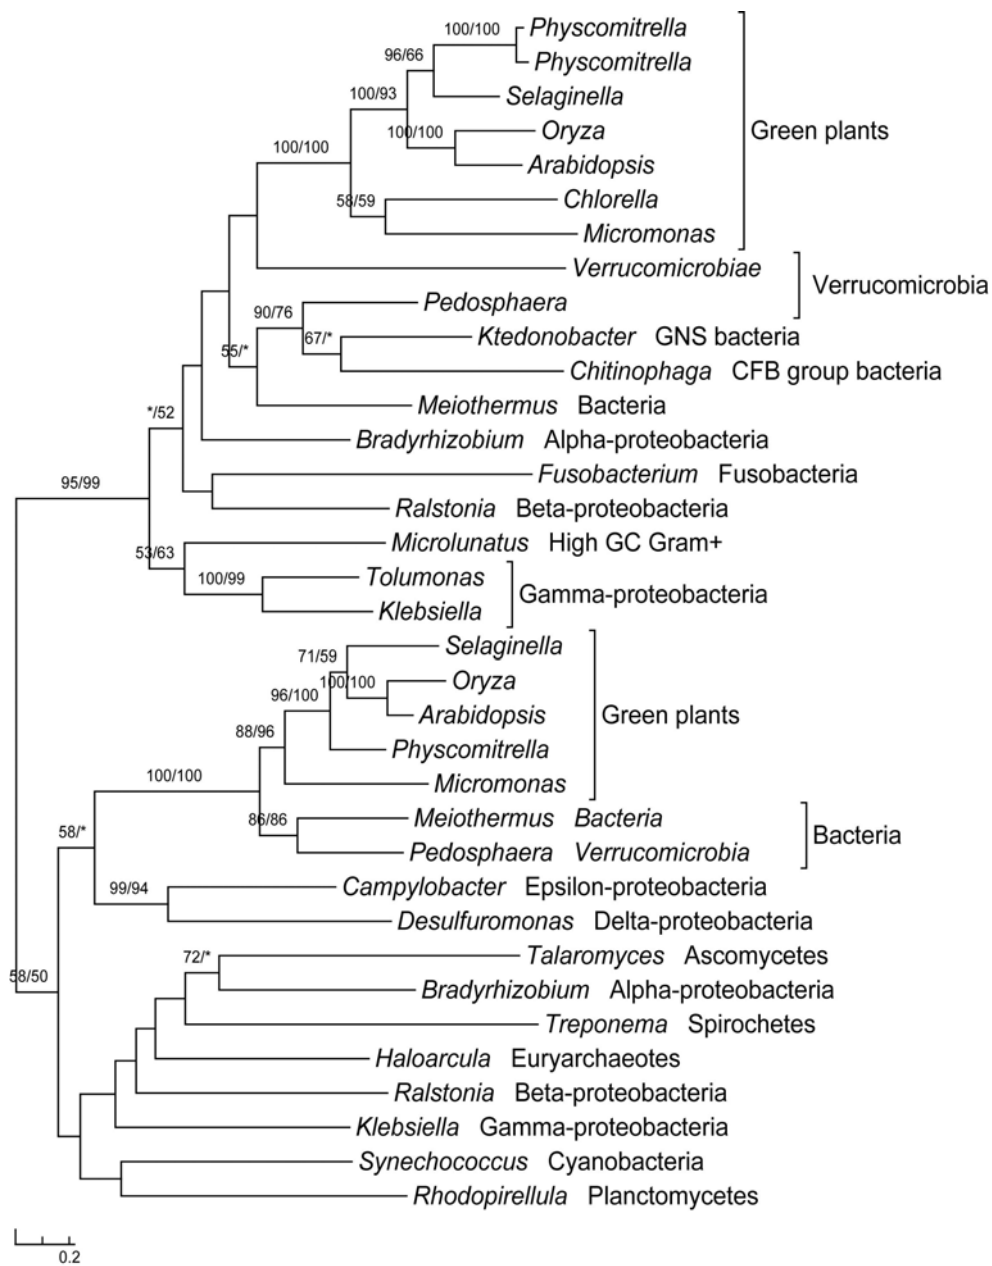

**Supplementary Figure S7. Phylogenetic analyses of allantoate amidohydrolase (AAH) and ureidoglycolate amidohydrolase.** Identifiable homologs of *Physcomitrella* AAH (upper part of the tree; Genbank GI numbers 167997139, 168064079) are only found in green plants and bacteria. *Physcomitrella* ureidoglycolate amidohydrolase sequence (lower part of the tree; Genbank GI number 168010247) forms a highly supported clade with homologs from green plants and bacteria. The relationship of these two gene families is supported by multiple conserved amino acid residues.



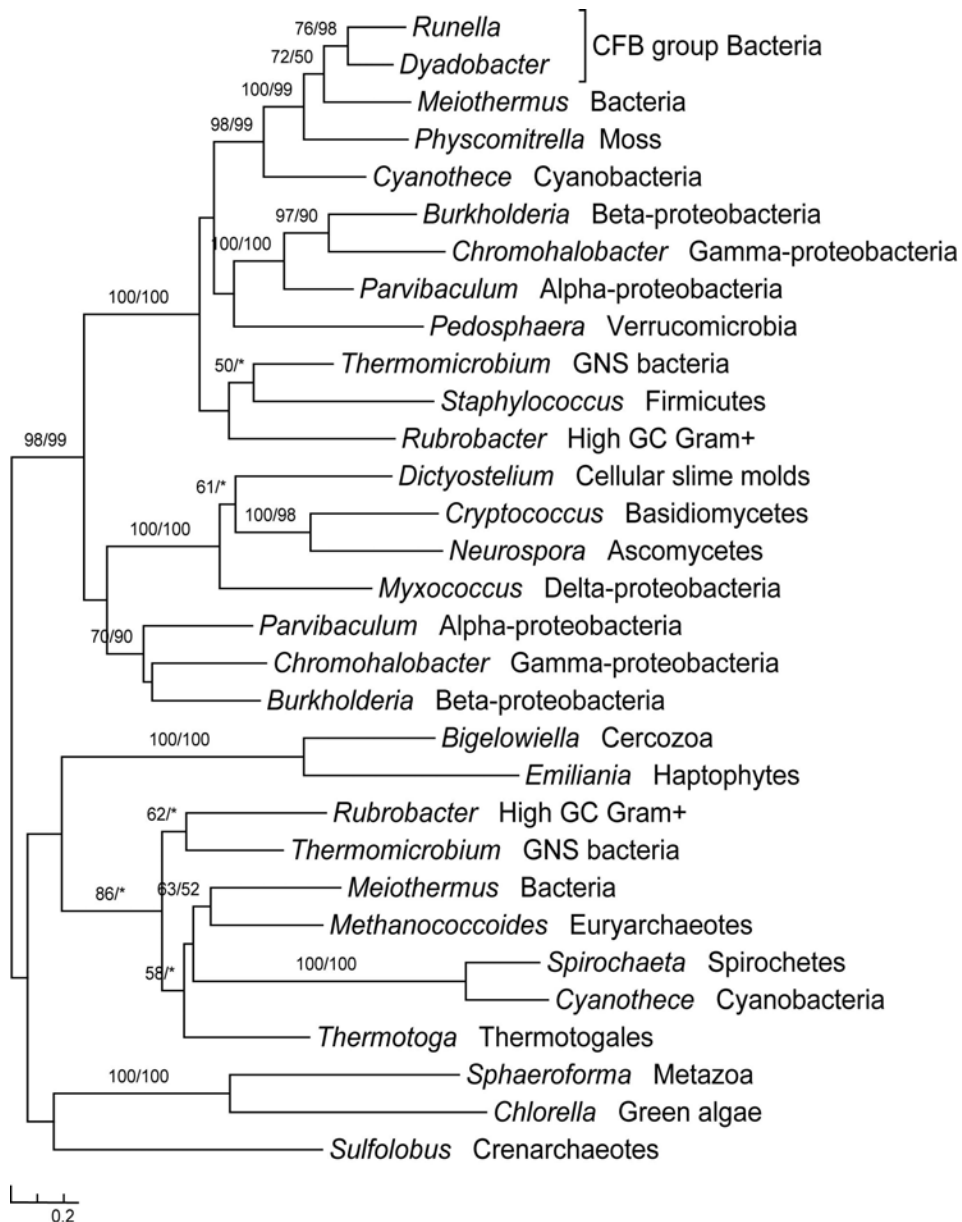

**Supplementary Figure S8. Molecular phylogeny of glutamine synthetase.** *Physcomitrella* sequence (Genbank GI numbers 168040136) has 59-61% identity with homologs of bacterial *Runella*, *Dyadobacter*, and *Meiothermus*. These sequences form a highly supported clade. Several other eukaryotic sequences group with miscellaneous bacterial homologs. Some of these eukaryotic sequences are predicted by TargetP to be mitochondrial precursors, indicating a likely mitochondrial or alpha-proteobacteria origin.

A

|                       |                       |         |     |
|-----------------------|-----------------------|---------|-----|
| <i>Physcomitrella</i> | EGEFDKCLAMYEA-GIVN    | CVSVPDG | 242 |
| <i>Selaginella</i>    | EGEMDKLSMEEA-GIIN     | CVSVPDG | 197 |
| <i>Arabidopsis</i>    | EGEIDKCLAMEEA-GFLN    | CVSVPDG | 308 |
| <i>Ostreococcus</i>   | EGEMDKLALAEA-GFKN     | VVSVPDG | 211 |
| <i>Nitrosococcus</i>  | EGEMDKLALAVA-GFRN     | VVSVPDG | 195 |
| <i>Bacteroides</i>    | EGEMDALSFFEC-GRTD     | VVSVPNG | 207 |
| <i>Rhizobium</i>      | EGEIDGLTAIDC-GFHT     | TVSVPDG | 147 |
| <i>Prevotella</i>     | EGMMDALALMEC-GFDN     | VISVSNG | 205 |
| <i>Phaeodactylum</i>  | EGEYDAMAVVQATGRP      | AVSLPNG | 292 |
| <i>Ectocarpus</i>     | EGEYDAMAVYQATGKP      | AVSLPNG | 273 |
| <i>Albugo</i>         | EGEFDAMTVYQATGKP      | AVSLPNG | 349 |
| <i>Acanthamoeba</i>   | EGEFDAMAVYQATGLP      | AISLPNG | 369 |
| <i>Guillardia</i>     | EGEIDAMTVYQETGLP      | SLSLPNG | 79  |
| <i>Dictyostelium</i>  | EGEYDAMAVYQETGIP      | TISLPNG | 404 |
| <i>Paramecium</i>     | EGEFDAMAAYQMTNIP      | AISLPYG | 339 |
| <i>Bilophila</i>      | EGEIDCLSISQLQGNKWPVVS | LPNG    | 188 |
| <i>Pyramidobacter</i> | EGEIDCLSVSQVQGNRWPVVS | VPNG    | 115 |
| <i>Pseudomonas</i>    | EGEIDCLTVAQLQGGKYPVVS | IPLG    | 180 |
| <i>Vibriophage</i>    | EGEIDCLTVAQIQGCKYPVVS | IPLG    | 182 |
| <i>Xenorhabdus</i>    | EGEIDCMSYHQY-GLP      | ALSVPFG | 235 |
| <i>Escherichia</i>    | EGEIDCMSYAQY-GIS      | ALSVPFG | 233 |
| <i>Escherichia 2</i>  | EGEIDCMTYSQF-GIS      | ALSVPFG | 230 |
| <i>Legionella</i>     | EGEIDAMSLYQY-GFP      | ALSVPFG | 227 |

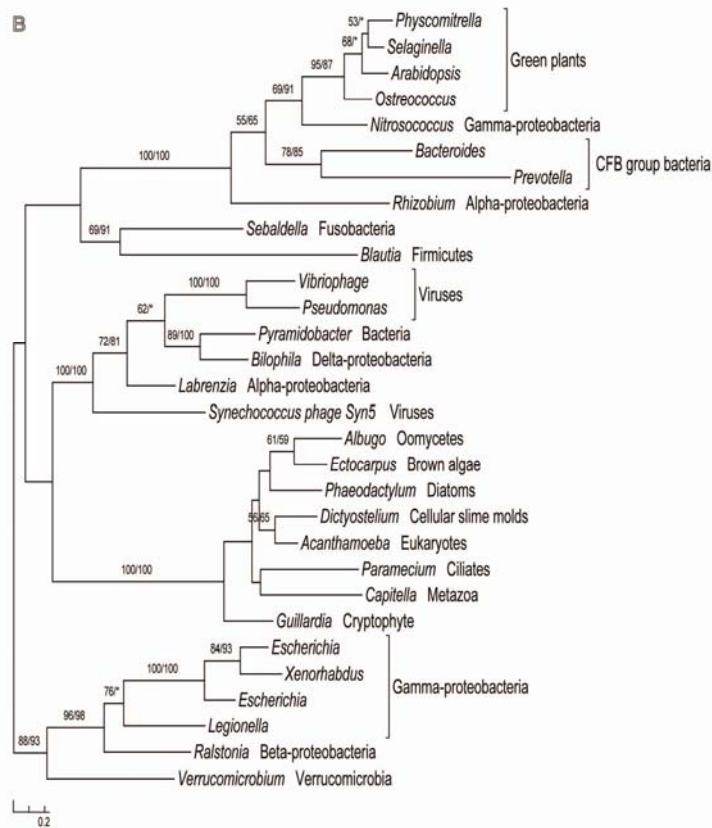

**Supplementary Figure S9. Multiple protein sequence alignment (A) and molecular phylogeny of toprim domain-containing protein.** *Physcomitrella* sequence (Genbank GI number 168040643) forms a clade with green plant and bacterial homologs. Other eukaryotic sequences form another clade. Some of these other eukaryotic sequences are predicted to mitochondrial precursors by TargetP, indicating likely mitochondrial origin. The closer relationship between green plant sequence and bacterial homologs is also supported by multiple shared indels.

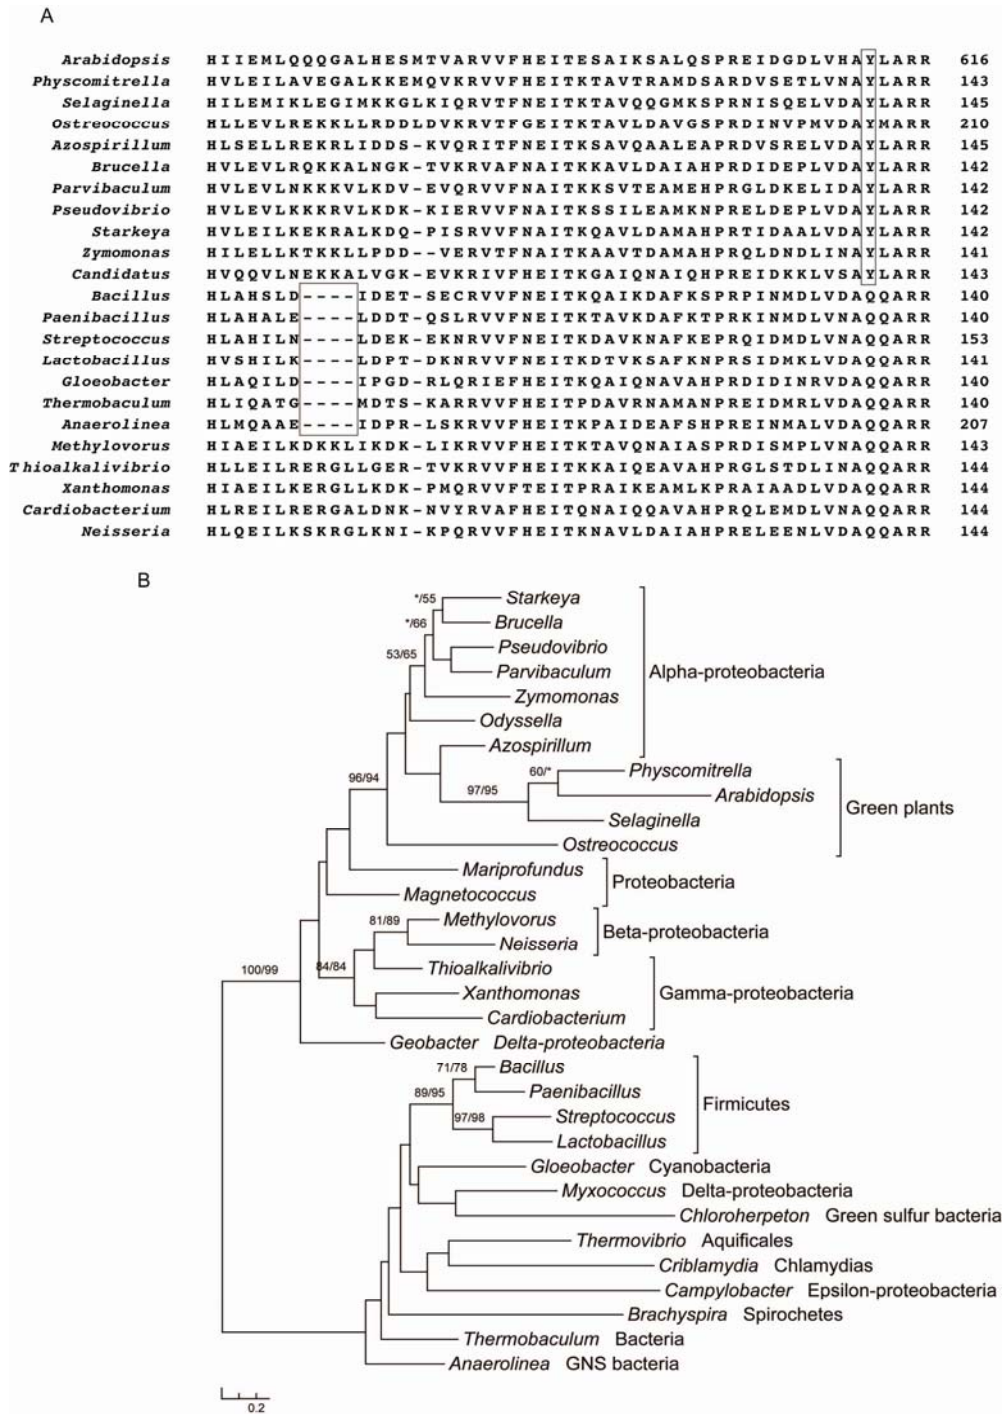

**Supplementary Figure S10. Multiple protein sequence alignment (A) and molecular phylogeny of DNA topoisomerase I (B).** *Physcomitrella* sequence (Genbank GI number 168037859) forms a clade with homologs from green plants and alpha-proteobacteria. Identifiable homologs were only found in green plants and bacteria. Highly supported clades on the phylogenetic tree are also supported by several conserved amino acid residues and shared indels.

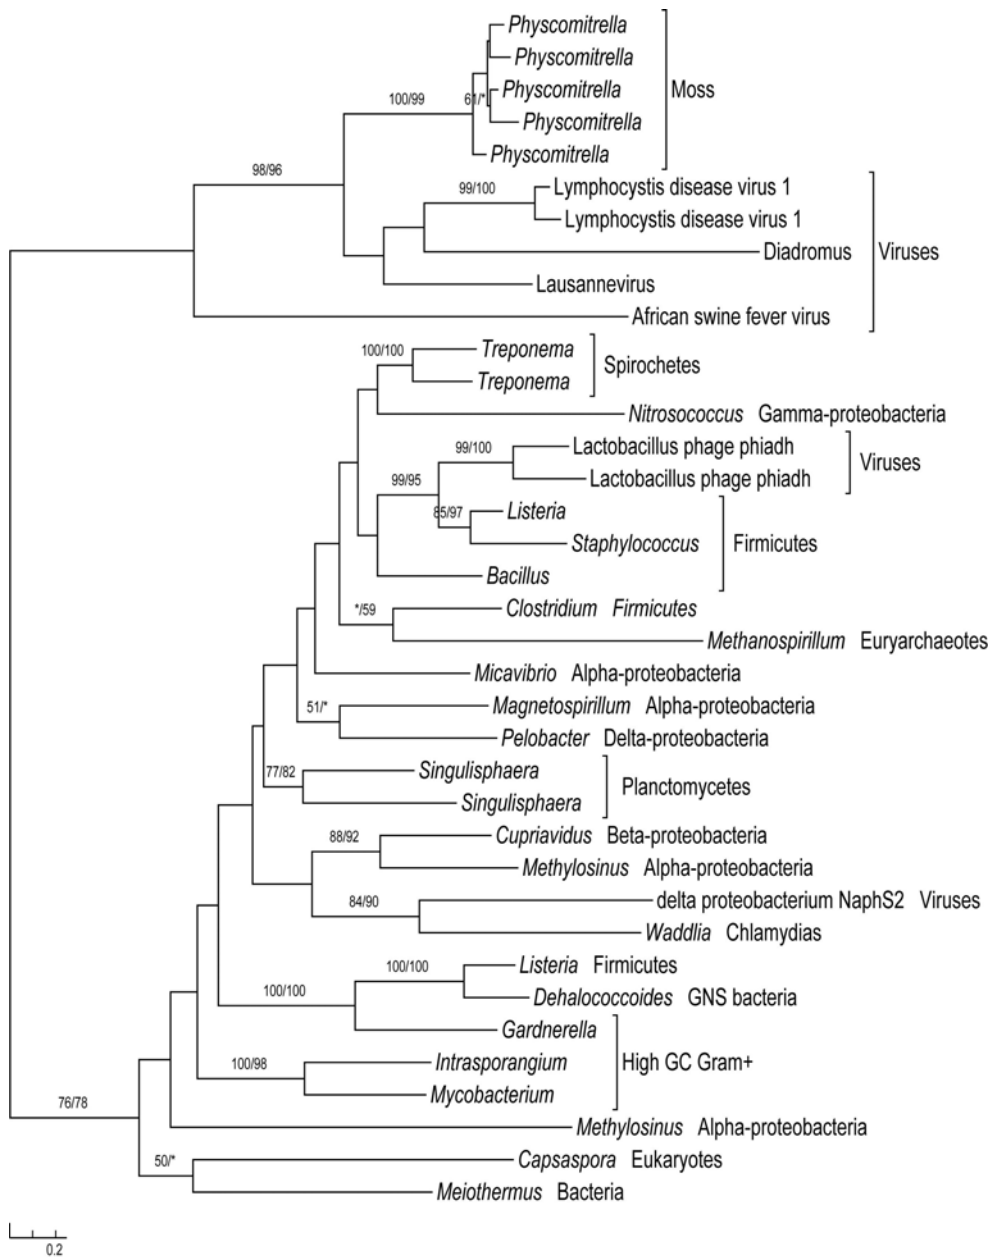

**Supplementary Figure S11. Molecular phylogeny of phage/plasmid primase, P4 family.** Identifiable homologs of moss sequences are only found in viruses and bacteria. *Physcomitrella* sequences (Genbank GI numbers 168026035, 168057313, 168032336, 168009191, 168041210) form a highly supported clade with viral homologs.

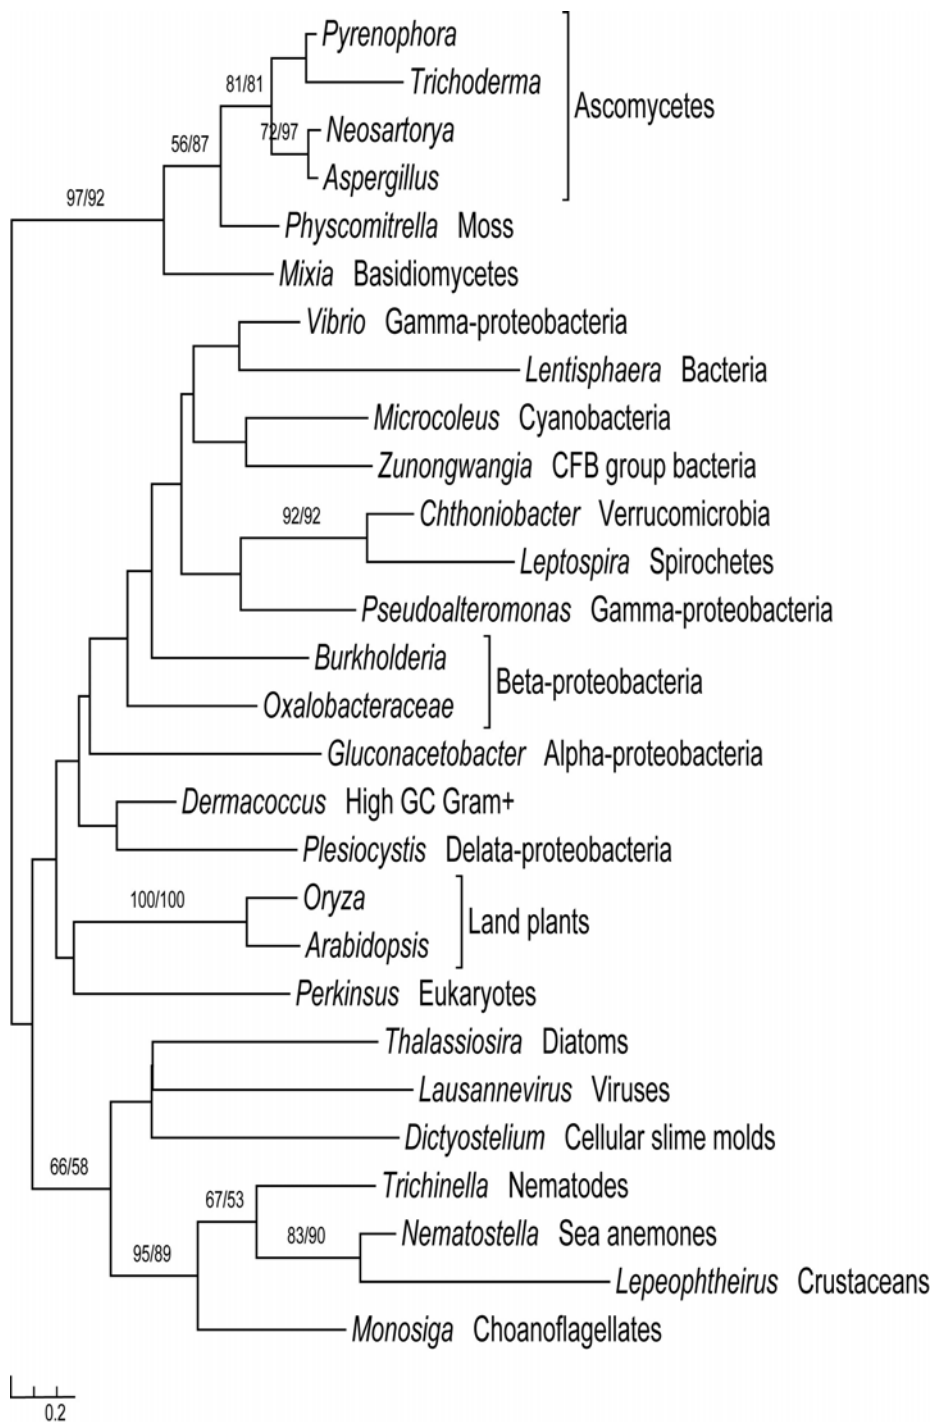

**Supplementary Figure S12. Molecular phylogeny of DNA repair family protein.** *Physcomitrella* sequence (Genbank GI numbers 168044851) has 50% identity with fungal homologs, and they form a highly supported clade. Several other eukaryotic sequences group with bacterial homologs. Some of these eukaryotic sequences are predicted by TargetP to be mitochondrial precursors, indicating a likely mitochondrial origin.

**A**

|                           |                                                                   |     |
|---------------------------|-------------------------------------------------------------------|-----|
| <i>Physcomitrella</i>     | TGAPDVERSYTCRRLAELFQEVKEMETSVSDASQRRFGEEFHTPGHIFLCVENKGLSVRTGHT   | 179 |
| <i>Selaginella</i>        | TGASDVERSYTCRRLAGLWGEH---SCASNGNGEAFGREFHAPGHIFPLCVENSLGLRARGHTE  | 174 |
| <i>Nitrosoarchaeum</i>    | TGITDKDRSLTIREMANIFKVD-----NKKKKFASFFKTEGHVPLLLASKGLLARQGHTE      | 163 |
| <i>Methanocaldococcus</i> | TGITDNDRAFTTKLAEVLKVEE-----RFNDFGKEFRSPGHVTLRAAEGLVKNRQGHTE       | 166 |
| <i>Archaeoglobus</i>      | TGITDVEDRALTIIRRIEVEVDEV-----MMGKKVDFGREFRSPGHVALLRAADKLTVERVQOTE | 171 |
| <i>Halomicrobium</i>      | TGITDEDRLTITELAGAASEP-----DGTTFAEQFRSPGHVTLRRGAPGLLSDRLGHT        | 166 |
| <i>Staphylothermus</i>    | TGISDYDKALTIKTLSEIASLI--YKGYMEEARDRFLKEFYAPGHVPLVTSR--GLANRRGHT   | 167 |
| <i>Acidilobus</i>         | TGISDVEDRRTVRELYEVVKMF--VSGDREGARRKFLGFEQAPGHVPLLASR--GLRSRRGHT   | 166 |
| <i>Acidianus</i>          | TGISDNDRALTIKLEHEVISEL---KENEKDAVKRFYTEFYAPGHVPLLSR--GIGSRHGHT    | 164 |
| <i>Vulcanisaeta</i>       | TGIRDRDRALTIARLADVIKMI--EEGRVADARKVFYGEFYAPGHVPLLLGRVSG--RRFGHT   | 162 |
| <i>Physcomitrella_2</i>   | TGVSADRCQTTIRALASPDSTR-----GDFVAPGHIFPLRCREGVPLTRRGHT             | 289 |
| <i>Selaginella_2</i>      | TGVSSEDRAITISMLASPNATA-----SDFKKPGHVPLRYREGVPLKRGHT               | 169 |
| <i>Arabidopsis</i>        | TGVSARDRATTILSLASRDSKP-----EDFNRPGHIFPLKYREGVPLKRGHT              | 272 |
| <i>Waddlia</i>            | TGVSADRAKTIRALVNPDSCP-----EDFRRPGHVPLRYREGVPLKRGHT                | 144 |
| <i>Monosiga</i>           | TGASAGDRAITATWLANPAATP-----TDFSRPGHIFPLVARDGGVPLERTGHT            | 149 |
| <i>Guillardia</i>         | TGISASDRAATLRLGSKESKA-----SDFTRPGHIFPLRGVPGVPLSREGHT              | 161 |
| <i>Thalassiosira</i>      | TGISATDRAVTVILASPDSTA-----LDFHRPGHIFPLRAQPNGLVLRDGHTE             | 164 |
| <i>Cyanidioschyzon</i>    | TGISAADRSATIRALANPRTA-----DDFRPBGHIFPLRYAKGGVPLKRGHT              | 273 |
| <i>Akkermansia</i>        | TGISAAERSLTIIRTLADPKATV-----NDFVQPGHTFPLRAVPGVPLKRGHT             | 149 |
| <i>Pedococcus</i>         | TGISAFDRAKTIQKLADFPQAF-----SEFYHPGHVPLIAEEGGVPLARGHT              | 147 |
| <i>Synechococcus</i>      | TGISADDRARTIQVALNPFSTRP-----ADLRRPGHIFPLRARSGGVPLKRGHT            | 137 |
| <i>Dysgonomonas</i>       | TGISAYDRAQITLALTRKDKTKP-----EDFGRPGHIFPLRAKDKGVLSRIGHTE           | 149 |
| <i>Campylobacter</i>      | TGVSAYERDVTIRLADPLSKP-----EDFVRPGHIFPLIAKGGVPLSRIGHTE             | 142 |
| <i>Ktedonobacter</i>      | TGISAHDRATTTIRALVNPATQP-----SDLARPGHVPLMARPGQTLERRGHTE            | 163 |
| <i>Phytophthora</i>       | TGVSAADRARTIRALADPEVGP-----SDFNRPGHIFPLLAQNGVMVVRAGHT             | 159 |
| <i>Fusobacterium</i>      | TGISLADRLTTIKKLANKNVFP-----SDFPKPGHIFPLIAKGGVPLKRGHT              | 144 |
| <i>Microcystis</i>        | TGISASDRSRTIQVALSPTTTP-----DDLSPRPGHIFPLRARAGGVFERAGHT            | 171 |

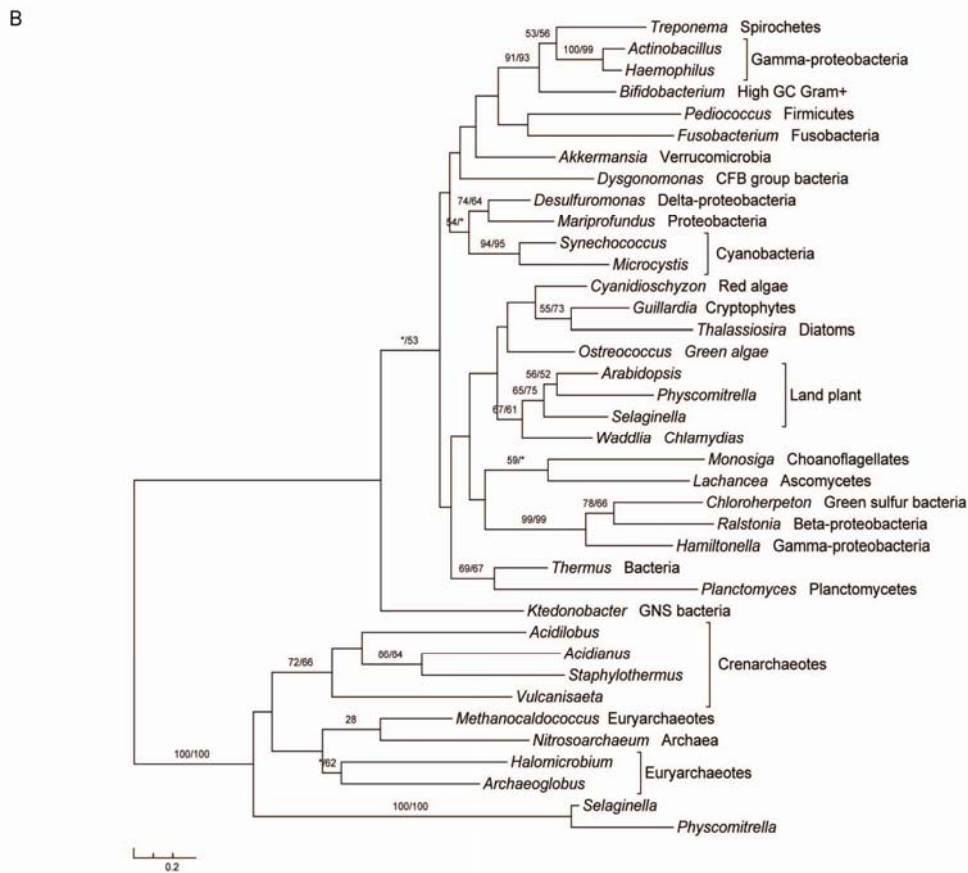

**Supplementary Supplementary Figure S13. Multiple protein sequence alignment (A) and molecular phylogeny of 3, 4-dihydroxy-2-butanone 4-phosphate synthase (*ribB*) (B).** BLAST result indicated that *Physcomitrella* sequence (Genbank GI number 168028296) has 31%-37% identity with homologs from archaea, whereas only 28% sequence identity with the other endogenous copy (GI number 168035901). This second copy is 332 aa longer and annotated as GTP cyclohydrolase-2 in *Arabidopsis*. It forms a clade with other eukaryotic homologs within bacterial sequences. This second copy was predicted by TargetP to be a chloroplast precursor, suggestive of possible plastid (or cyanobacterial) origin. The relationship of these two copies was also supported by several conserved amino acid residues and shared indels.

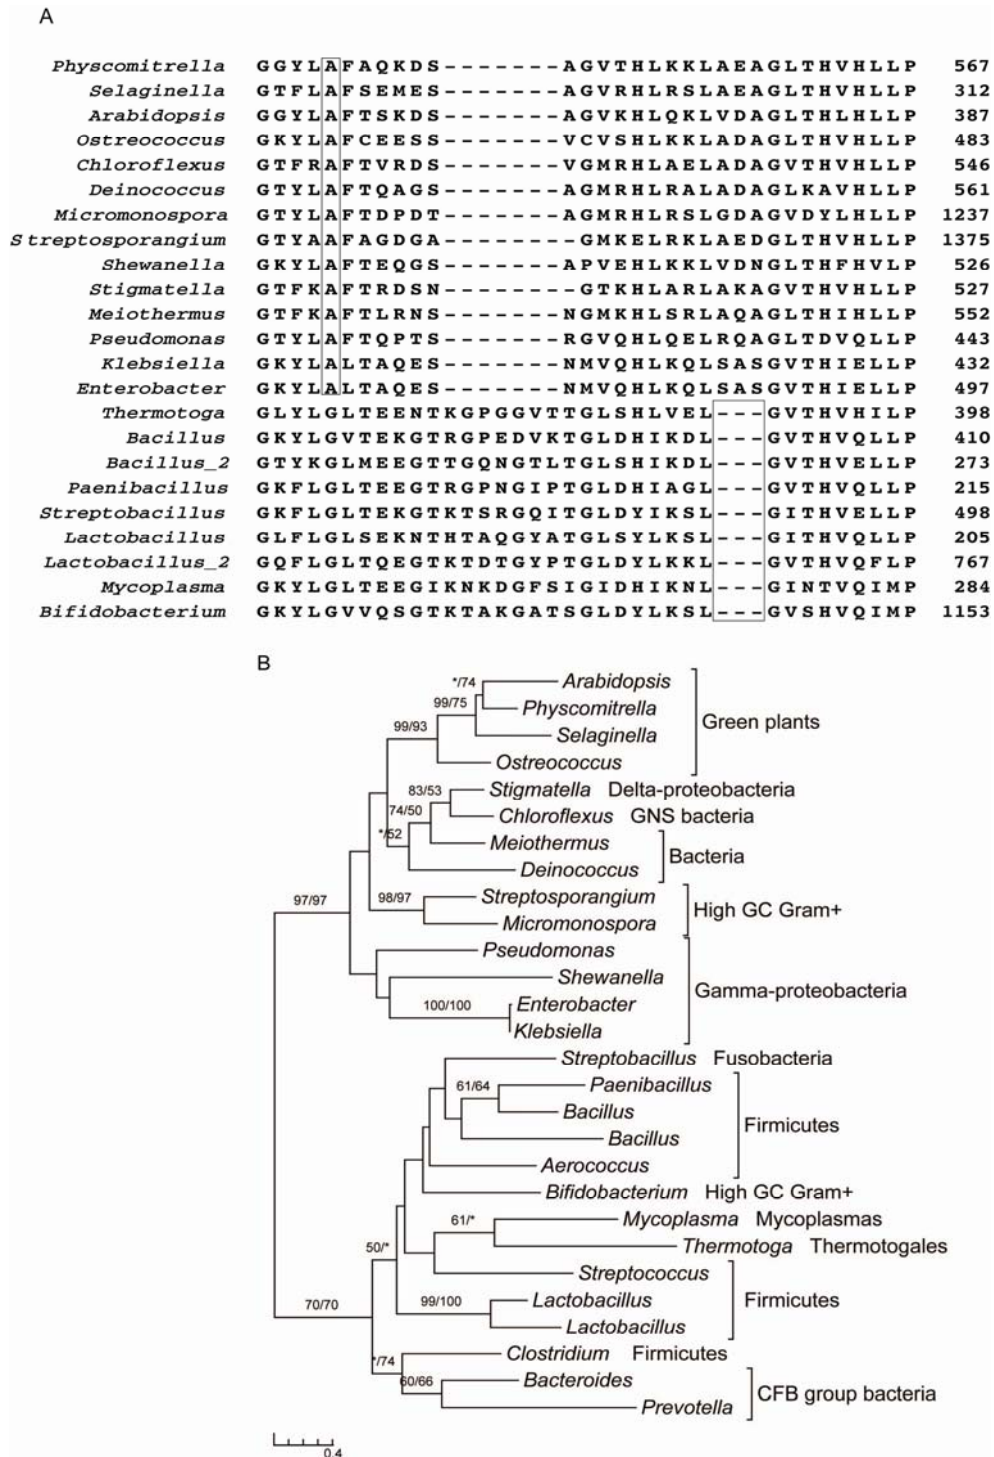

**Supplementary Figure S14. Multiple protein sequence alignment (A) and molecular phylogeny of limit dextrinase (LDA) (B).** *Physcomitrella* sequence (Genbank GI number 168038552) forms a highly supported clade with homologs of green plants and bacteria. No cyanobacterial homologs were found, indicating that this gene family in green plants most likely is not derived from plastids (cyanobacteria).

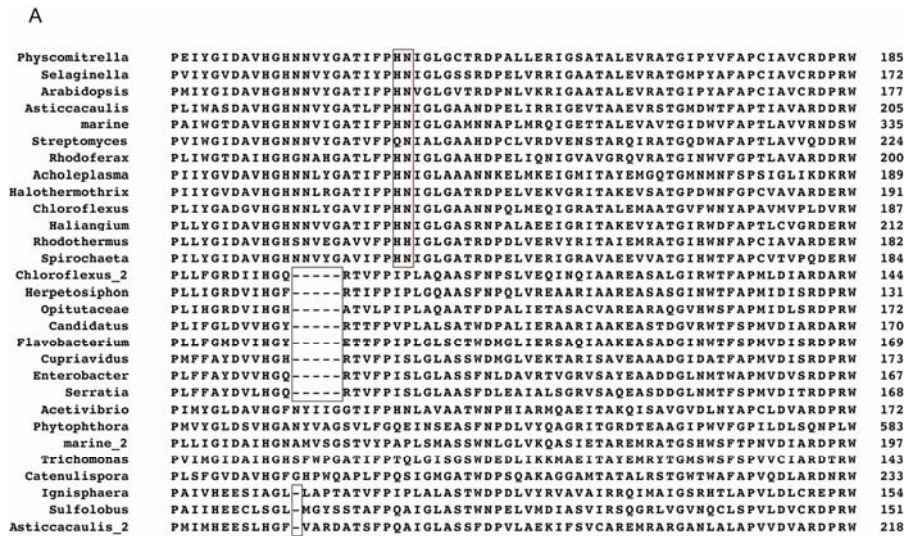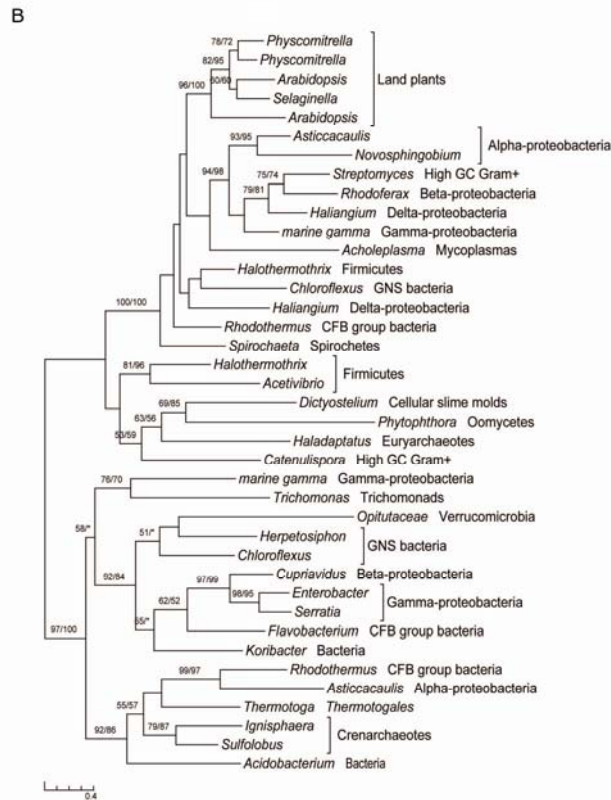

**Supplementary Figure S15. Multiple protein sequence alignment (A) and molecular phylogeny of  $\beta$ -glucosidase (B).** Identifiable homologs of *Physcomitrella* sequences are predominantly found in bacteria. *Physcomitrella* sequences (Genbank GI numbers 168069539, 168059435) form a monophyletic group with other land plant and bacterial homologs. This relationship is also supported by several conserved amino acid residues and shared indels. No cyanobacterial homologs were found, indicating that this gene family in land plants is unlikely of plastid (cyanobacterial) origin.



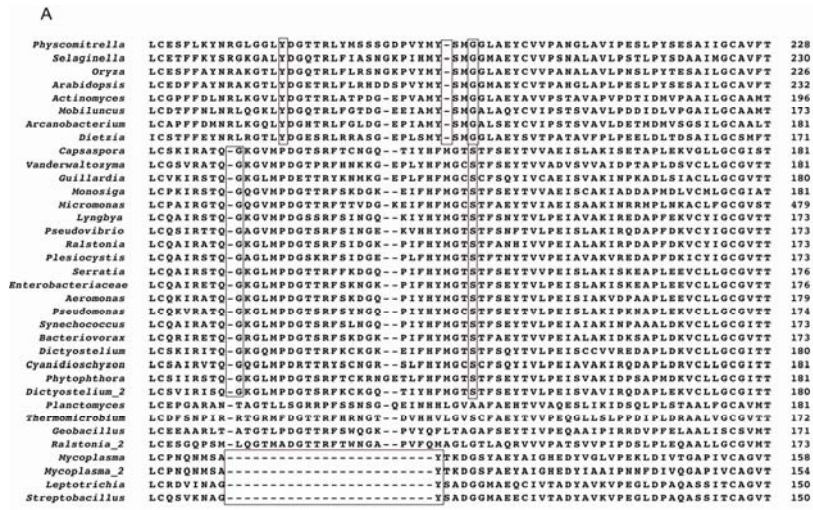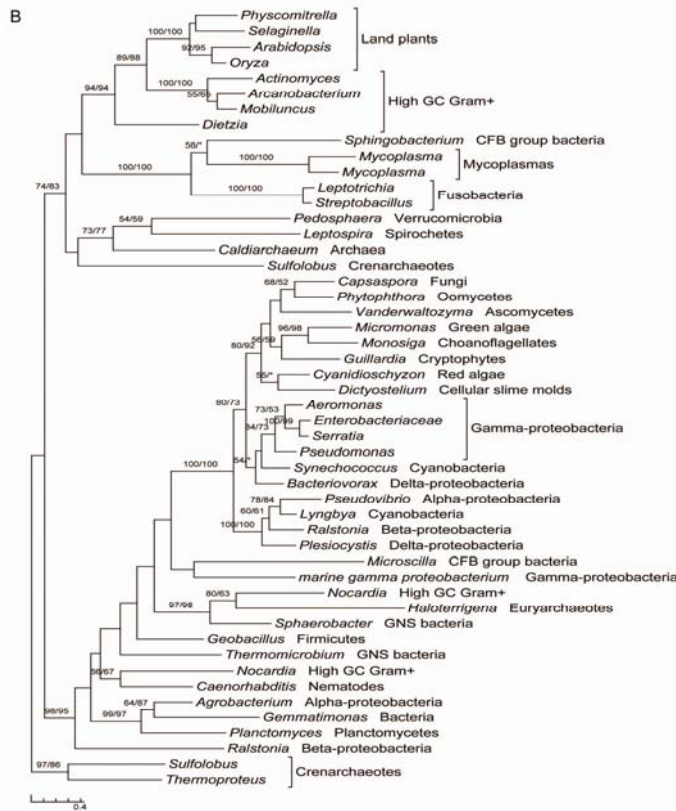

**Supplementary Figure S16. Multiple protein sequence alignment (A) and molecular phylogeny of GroES-like zinc-binding alcohol dehydrogenase (B).** Identifiable homologs of *Physcomitrella* sequences are predominantly found in bacteria. *Physcomitrella* sequence (Genbank GI number 168030245) groups with homologs from land plants and high GC gram-positive bacteria. Several other eukaryotic sequences form another monophyletic group with bacterial homologs, possibly derived from either ancient HGT or mitochondria. The highly supported clades on the phylogenetic tree are also supported by several conserved amino acid residues and shared indels.

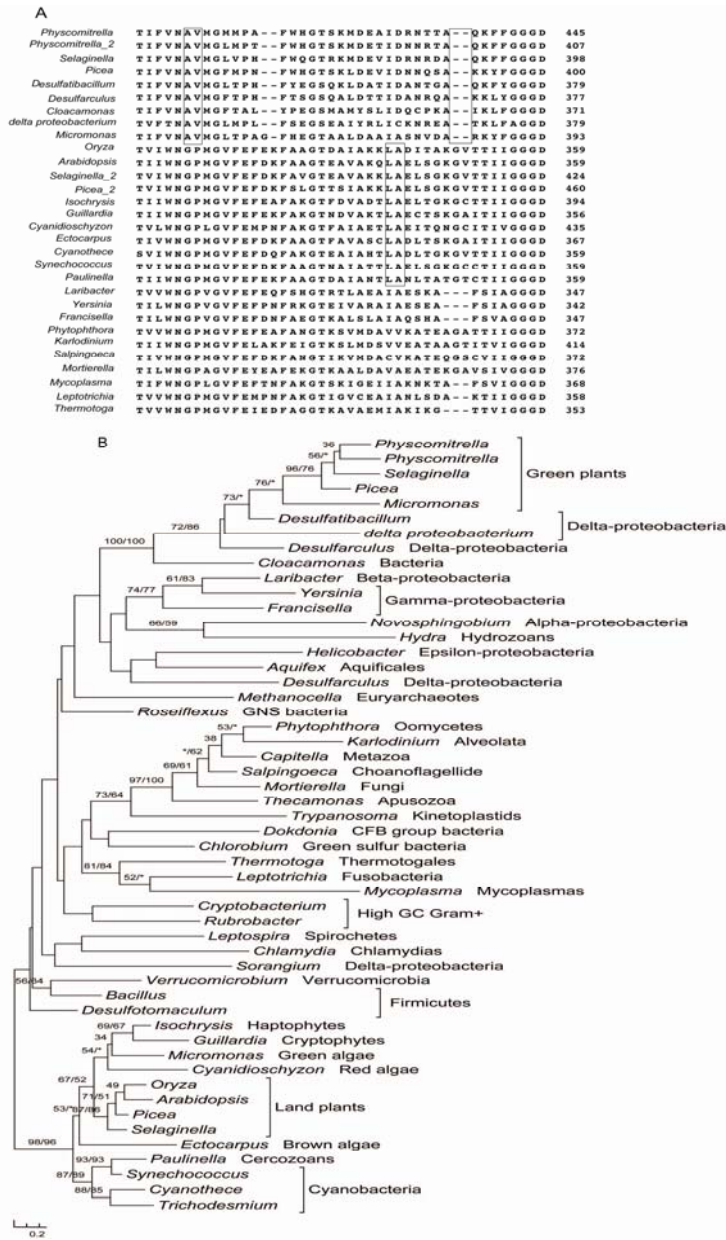

**Supplementary Figure S17. Multiple protein sequence alignment (A) and molecular phylogeny of phosphoglycerate kinase (PGK) (B).** *Physcomitrella* sequences (Genbank GI numbers 168058081, 168034630) form a clade with green plant and delta-proteobacterial homologs. Several other eukaryotic sequences form a moderately supported clade, which in turn groups with bacterial homologs. Some of these eukaryotic sequences are predicted by TargetP to be mitochondrial precursors, indicating likely mitochondrial origin. Another gene copy of land plants forms a highly supported monophyletic group with cyanobacterial and other photosynthetic eukaryotic homologs. Some of these photosynthetic eukaryotic sequences are predicted by TargetP to be chloroplast precursors, indicating likely plastid (or cyanobacterial) origin. *Physcomitrella* sequence is absent from this clade, suggesting that either replacement of plastid homolog or gene acquisition following a loss of plastid copy in *Physcomitrella*.

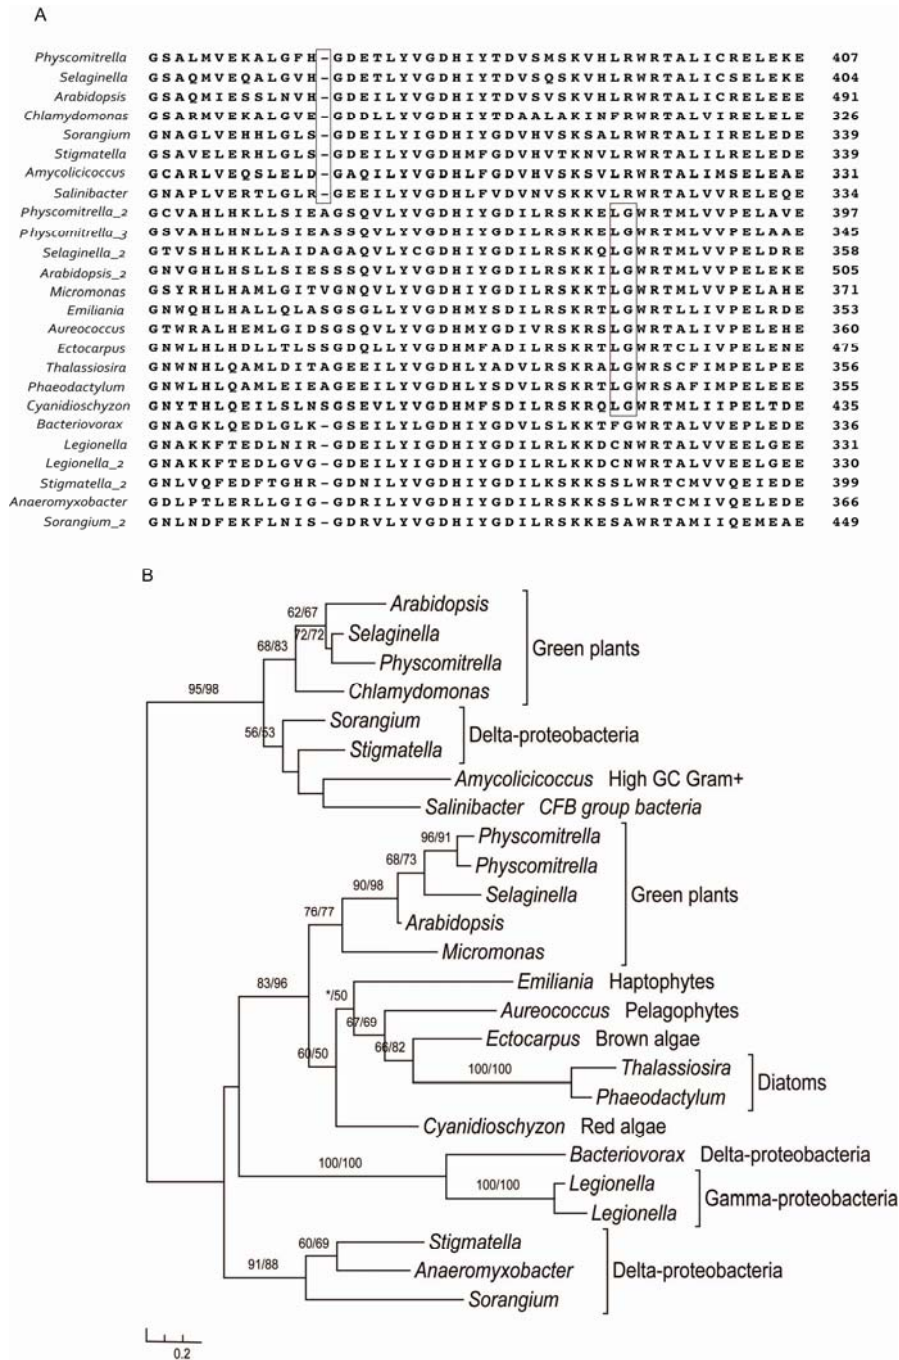

**Supplementary Figure S18. Multiple protein sequence alignment (A) and molecular phylogeny of HAD-superfamily hydrolase (B).** *Physcomitrella* sequence (Genbank GI number 168001220) forms a clade with green plant and bacterial homologs. Other two copies group with green plant and other photosynthetic eukaryotic homologs. In *Arabidopsis*, it is targeted to chloroplasts. Most of other eukaryotic sequences are predicted by TargetP to be mitochondrial precursors, indicating likely mitochondrial origin. The relationship of these gene copies is also supported by several conserved amino acid residues and shared indels.

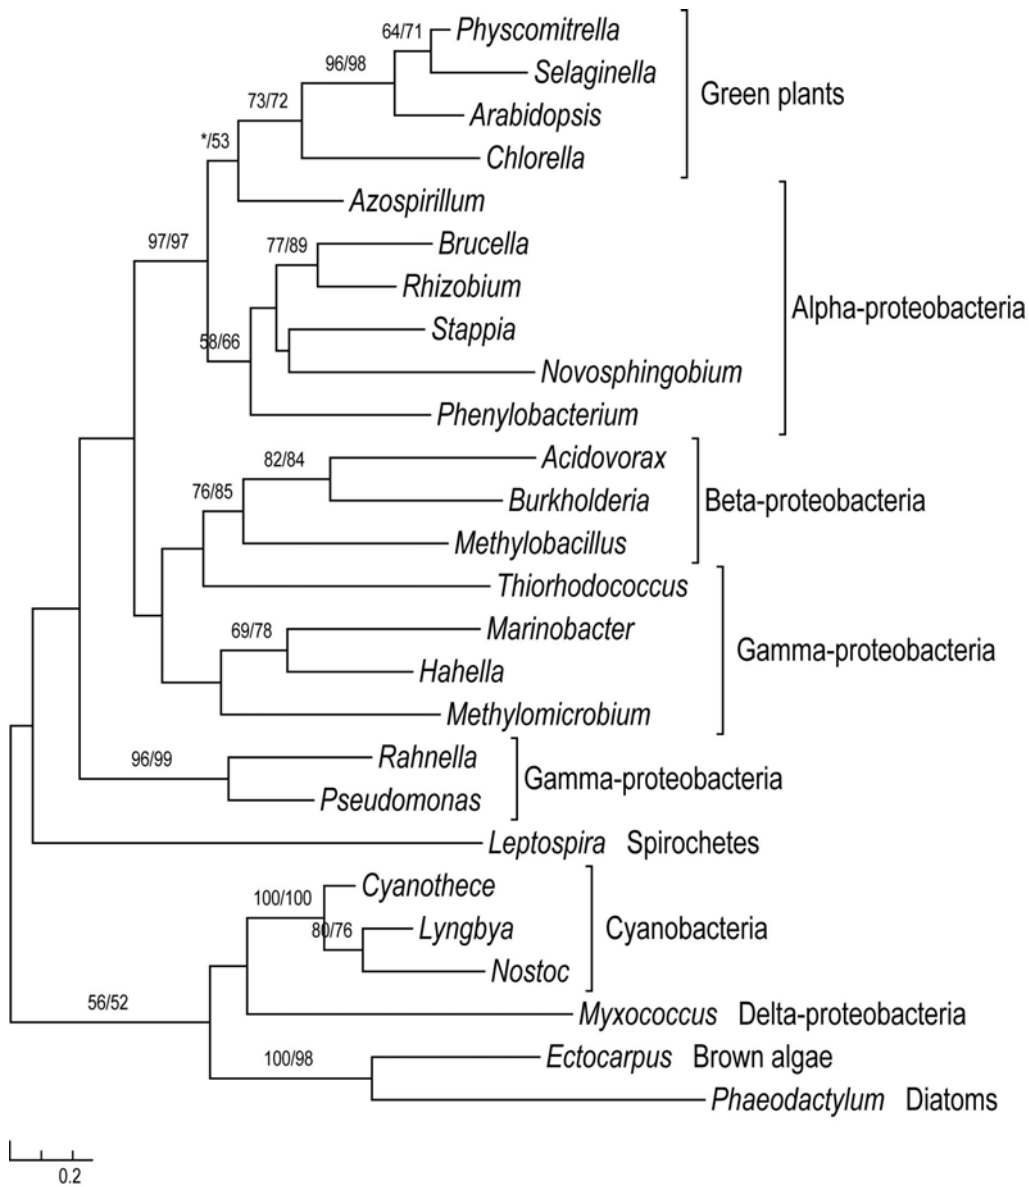

**Supplementary Figure S19. Molecular phylogeny of Acyl-CoA N-acyltransferase.** *Physcomitrella* sequence (Genbank GI number 168042611) forms a highly supported clade with homologs from green plants and alpha-proteobacteria. Two sequences from brown algae and diatoms group with cyanobacterial and delta-proteobacterial homologs with modest support. It is unclear whether these two sequences are of plastid origin.

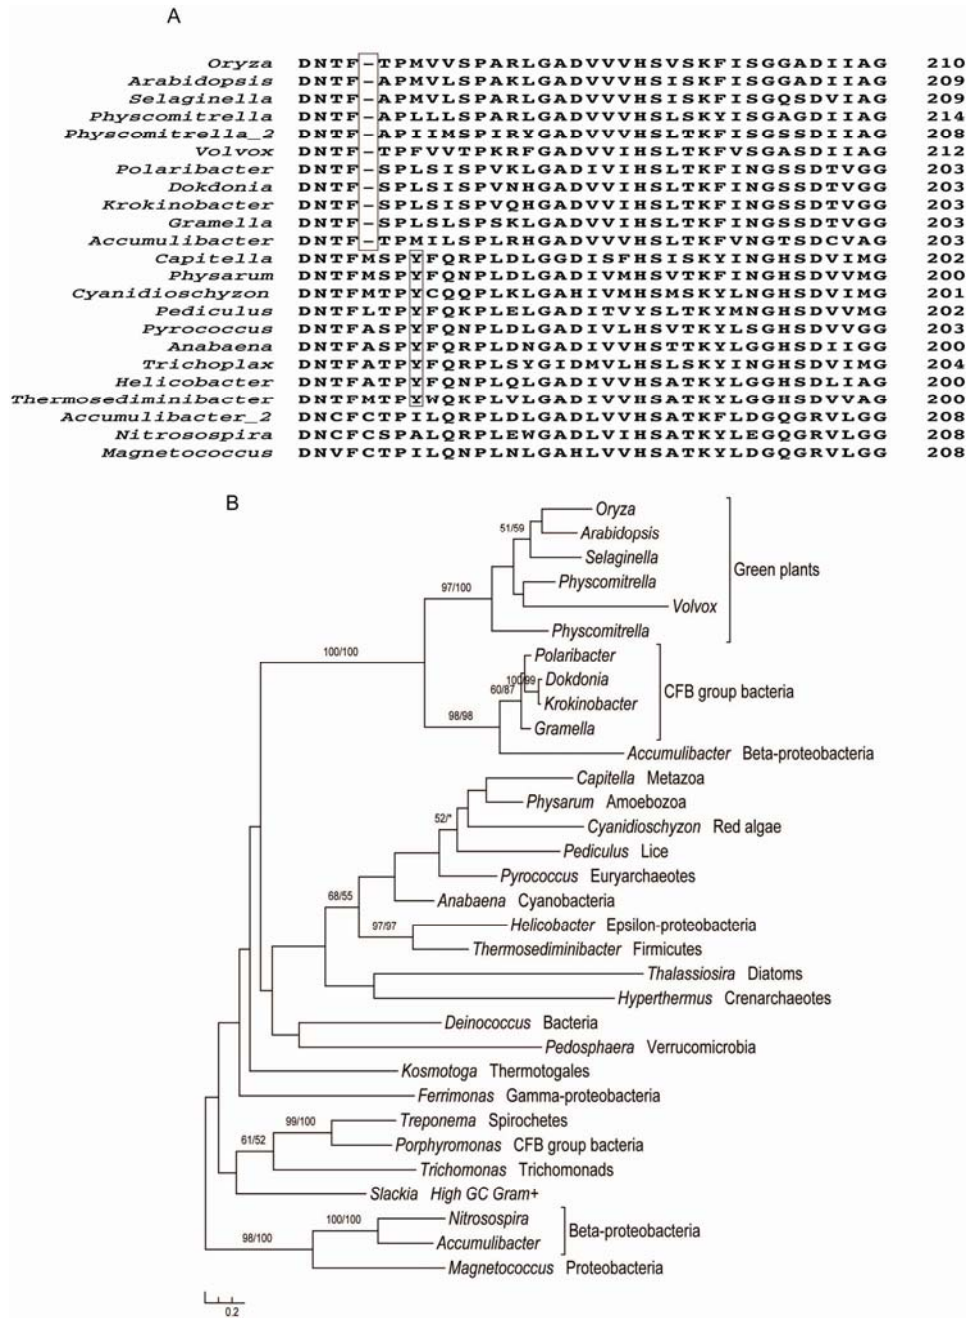

**Supplementary Figure S20. Multiple protein sequence alignment (A) and molecular phylogeny of methionine gamma-lyase (MGL) (B).** *Physcomitrella* sequences (Genbank GI numbers 168013924, 168008405) form a clade with homologs from other green plants, CFB bacteria, and beta-proteobacterial *Accumulibacter*. Several other eukaryotic sequences group with bacterial homologs. Some of these eukaryotic sequences are predicted by TargetP to be mitochondrial precursors, indicating likely mitochondrial origin. The close relationship between green plant sequences and bacterial homologs is also supported by some conserved amino acid residues and shared indels.

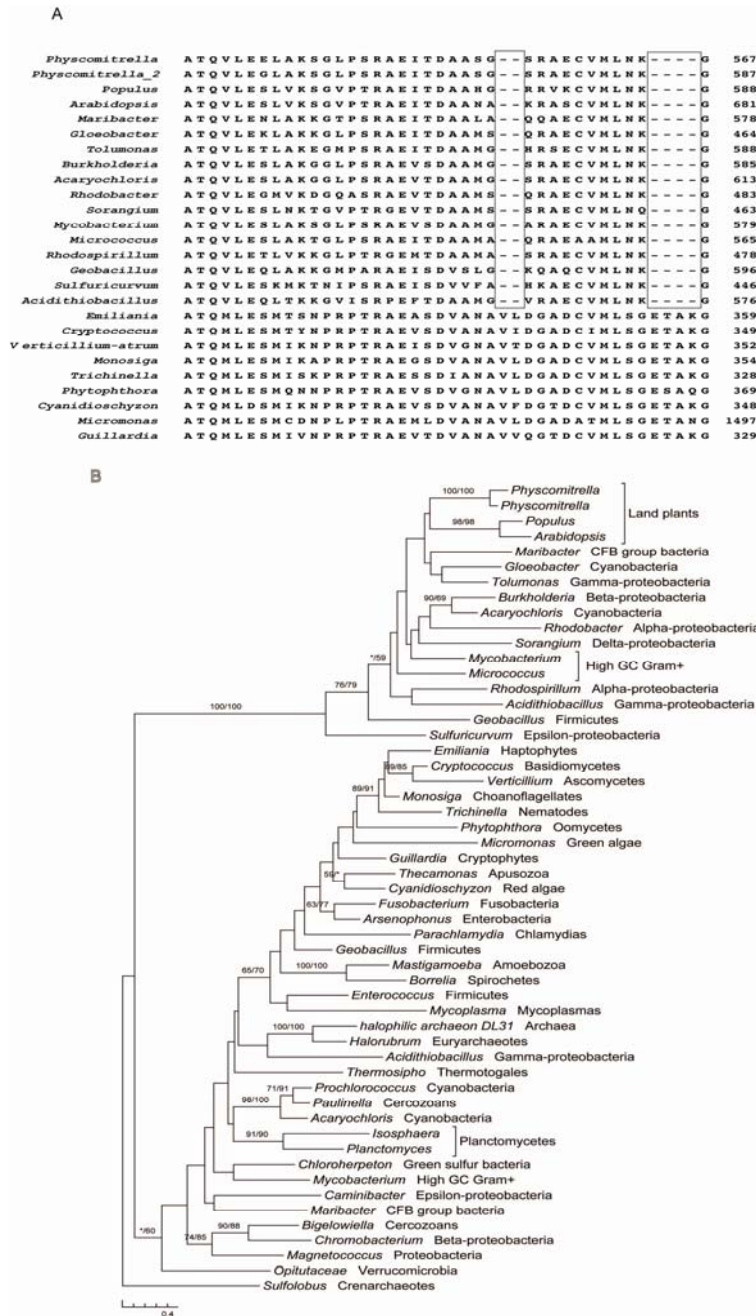

**Supplementary Figure S21. Multiple protein sequence alignment (A) and molecular phylogeny of pyruvate kinase (B).** *Physcomitrella* sequences (Genbank GI numbers 168053775, 168053903) form a clade with homologs from other land plants and miscellaneous bacteria. Green algal sequence forms another clade with homologs from other eukaryotes and bacteria. Some of these eukaryotic sequences are predicted by TargetP to be mitochondrial precursors, indicating likely mitochondrial origin. This relationship is also supported by several conserved amino acid residues and shared indels. Land plants sequences form a group with bacterial sequences, including those from cyanobacteria. However, these land plant sequences are unlikely of plastid (cyanobacterial) origin because cyanobacterial orthologs are rarely found in this clade.

**A**

|                          |                                           |        |       |     |
|--------------------------|-------------------------------------------|--------|-------|-----|
| <i>Physcomitrella</i>    | GDFASYDPWDPAAYRTEAAV--FPGSTMCSAFRTFQGWALS | EMRND  | SG    | 287 |
| <i>Microlunatus</i>      | GDVAAYDPWNAAYRTDAHQ--YPGSTMCSAFRTFQGWALS  | EMDND  | DQG   | 291 |
| <i>Janibacter</i>        | GTVESYDPWDAAHRTDAVN--YPASTMCSAFRTFQGWALS  | SDMDHD | DQG   | 283 |
| <i>Saccharopolyspora</i> | GTVEQYDPWDAAHRTAASQ--YPGSTMCSAFRTFQGWALS  | SDMAHD | DQG   | 283 |
| <i>Rhodococcus</i>       | GDFDRYDAWDAAYRTEVNEY--AGGSTMCSVFRSFQGWALS | EMRND  | DQG   | 275 |
| <i>Aeromonas</i>         | GDIAAYDPWDAAHARTEVEEYSVENTTKCSVFRTFQGWALS | SDMLPG | QGG   | 273 |
| <i>Salmonella</i>        | GNVEQYDPWNAAHARTEVEEYTVDNNTKCSVFRTFQGWALS | SDMLPG | QGG   | 274 |
| <i>Shigella</i>          | GNLAQYDPWHAHARTEVEEYTVDNNTKCSVFRTFQGWALS  | SDMLPG | QGG   | 274 |
| <i>Klebsiella</i>        | GNIDAYDPWDAAHARTEVEEYTVDNNTKCSVFRTFQGWALS | SDMLPG | QGG   | 286 |
| <i>Burkholderia</i>      | GNWRAYDPFDDAAFRPDVEE--IPSPAVCSMFRTFQGWALT | TPQGP  | DGD   | 267 |
| <i>Burkholderia_2</i>    | GNWRAYDPFDDAAYRPDVEE--IPSPAVCSMFRTFQGWALT | TPQGP  | DGD   | 267 |
| <i>Burkholderia_3</i>    | GNWRHYDAFDAAFRTDVEE--IASPAVCSMFRTFQGWALT  | TPQGP  | DGD   | 267 |
| <i>Halomonas</i>         | GVPERFDPPAALGRTOVRE--IASPAVCSMFRTFQGWALT  | TPQRS  | CAG   | 267 |
| <i>Yersinia</i>          | GDWQKYDAFAAEGRPEVRE--FPSPAVCSVFRTFQGWALT  | TPQRSH | HAG   | 268 |
| <i>Yersinia_2</i>        | GEWQQYDPPFAAEGRPEVRE--FPSPAVCSMFRTFQGWALT | TPQRTH | HAG   | 268 |
| <i>Grimontia</i>         | GNWQKYQAFHGANRIDVEE--YPSPAVCSVFRTFQGWALT  | TAQKG  | DGD   | 265 |
| <i>Vibrio</i>            | GHWQDYQAFDARHRIDVEE--FNSSAVCSVFRTFQGWALT  | TPQGA  | DGD   | 264 |
| <i>Cryptococcus</i>      | GKWEYDPPWDLSSGRLEANMNYNGPGGCSVFRTFQGWLGL  | SEHGP  | QQG   | 318 |
| <i>Paracoccidioides</i>  | GSWEYDPPWDAKHRIHAKMDLYNGAGACSMRFFQGWLS    | MSDTP  | GEG   | 291 |
| <i>Debaryomyces</i>      | GNWENFDPPYDATHRIEAKMDLHESRGTCSMFRTFQGW    | LAVSDI | APKEG | 286 |
| <i>Pyrenophora</i>       | GKWESFDPWEATCRLPVNADLHQVGVACNAFRMFQGW     | LSLSTT | GPHEG | 248 |

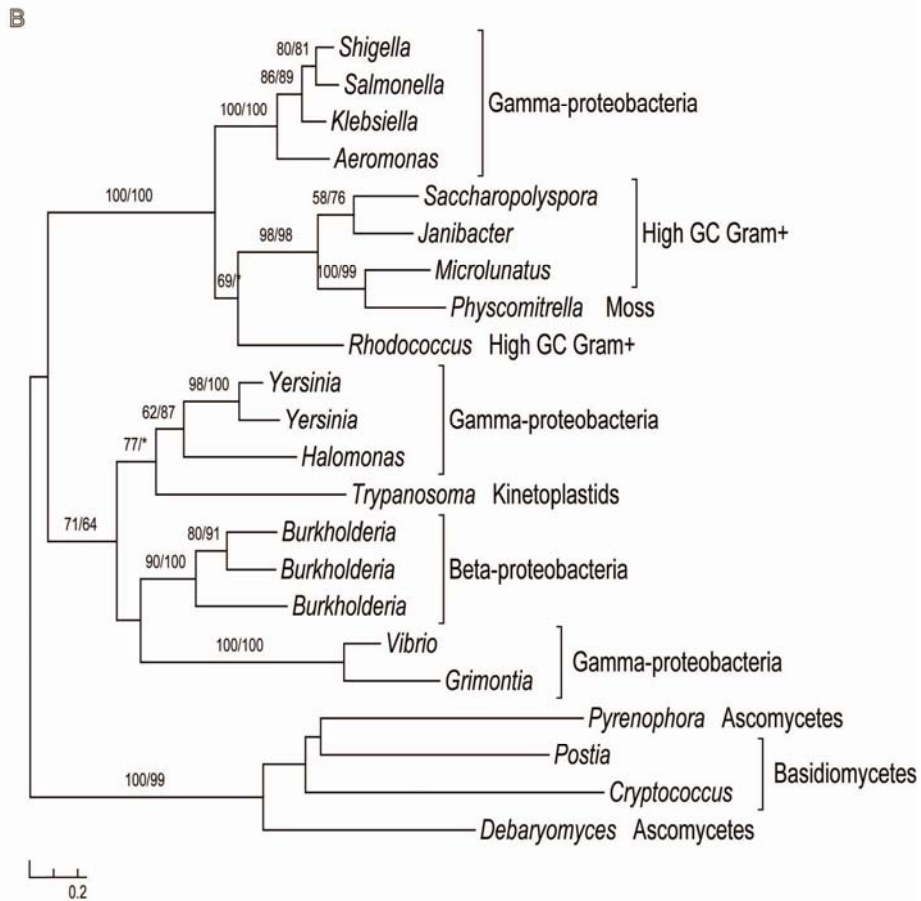

**Supplementary Figure S22. Multiple protein sequence alignment (A) and molecular phylogeny of *ybiU* protein (B).** *Physcomitrella* sequence (Genbank GI number 168021919) has 62-72% identity with homologs from high GC gram-positive bacteria. They form a highly supported clade in the phylogenetic tree. Their relationship is also supported by several conserved amino acid residues and shared indels.

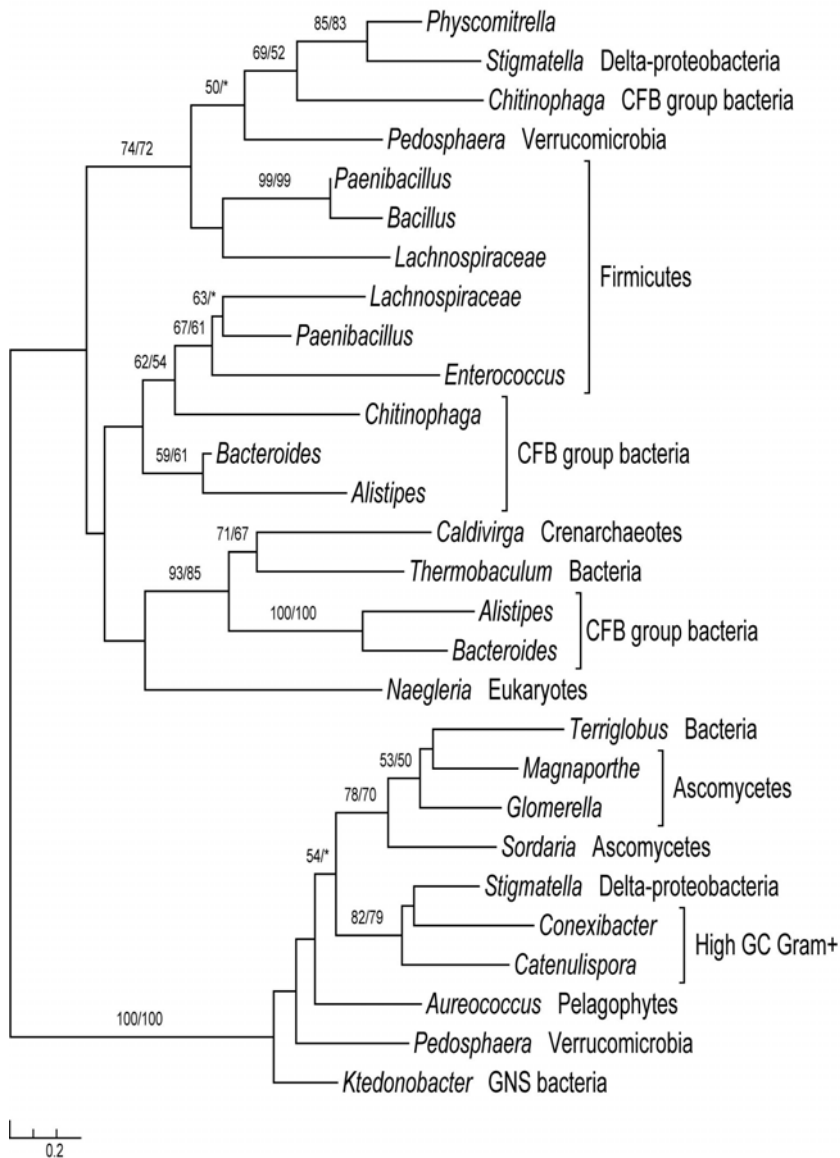

**Supplementary Figure S23. Molecular phylogeny of glycoside hydrolase.** BLAST result indicated that *Physcomitrella* sequence (Genbank GI number 168052263) has 50% identity with homologs from *Stigmatella aurantiaca*, and they form a monophyletic group in the phylogenetic tree. Several other eukaryotic sequences group with miscellaneous bacterial homologs. Some of these eukaryotic sequences were predicted by TargetP to be located in mitochondria, suggesting that they might be of mitochondrial (or alpha-proteobacterial) origin.



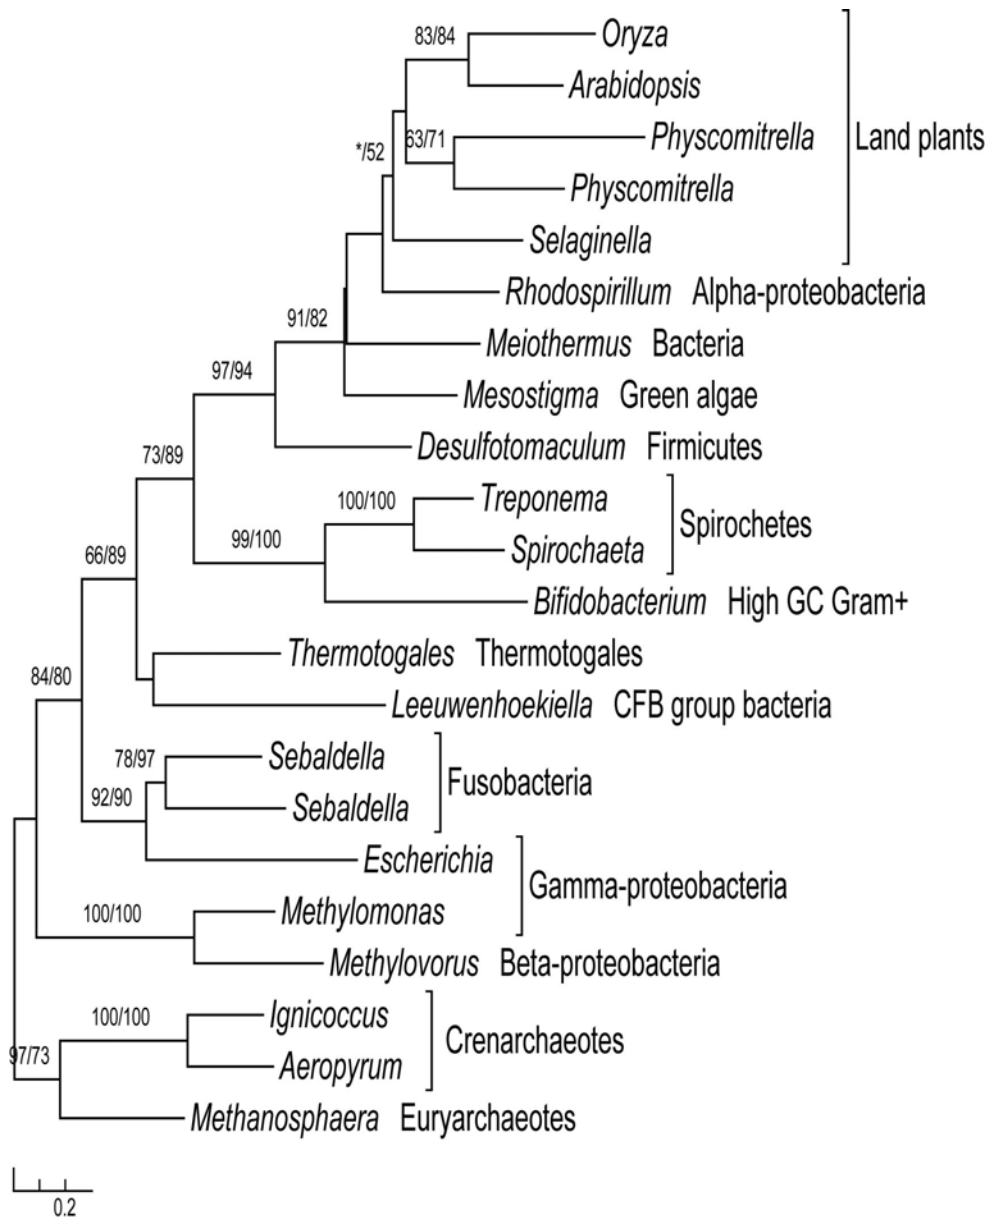

**Supplementary Figure S24. Molecular phylogeny of sugar isomerase (SIS) family.** Identifiable homologs of *Physcomitrella* sequences are only found in green plants and bacteria. No cyanobacterial homologs were found, indicating that this gene family in green plants is unlikely of plastid (cyanobacterial) origin.

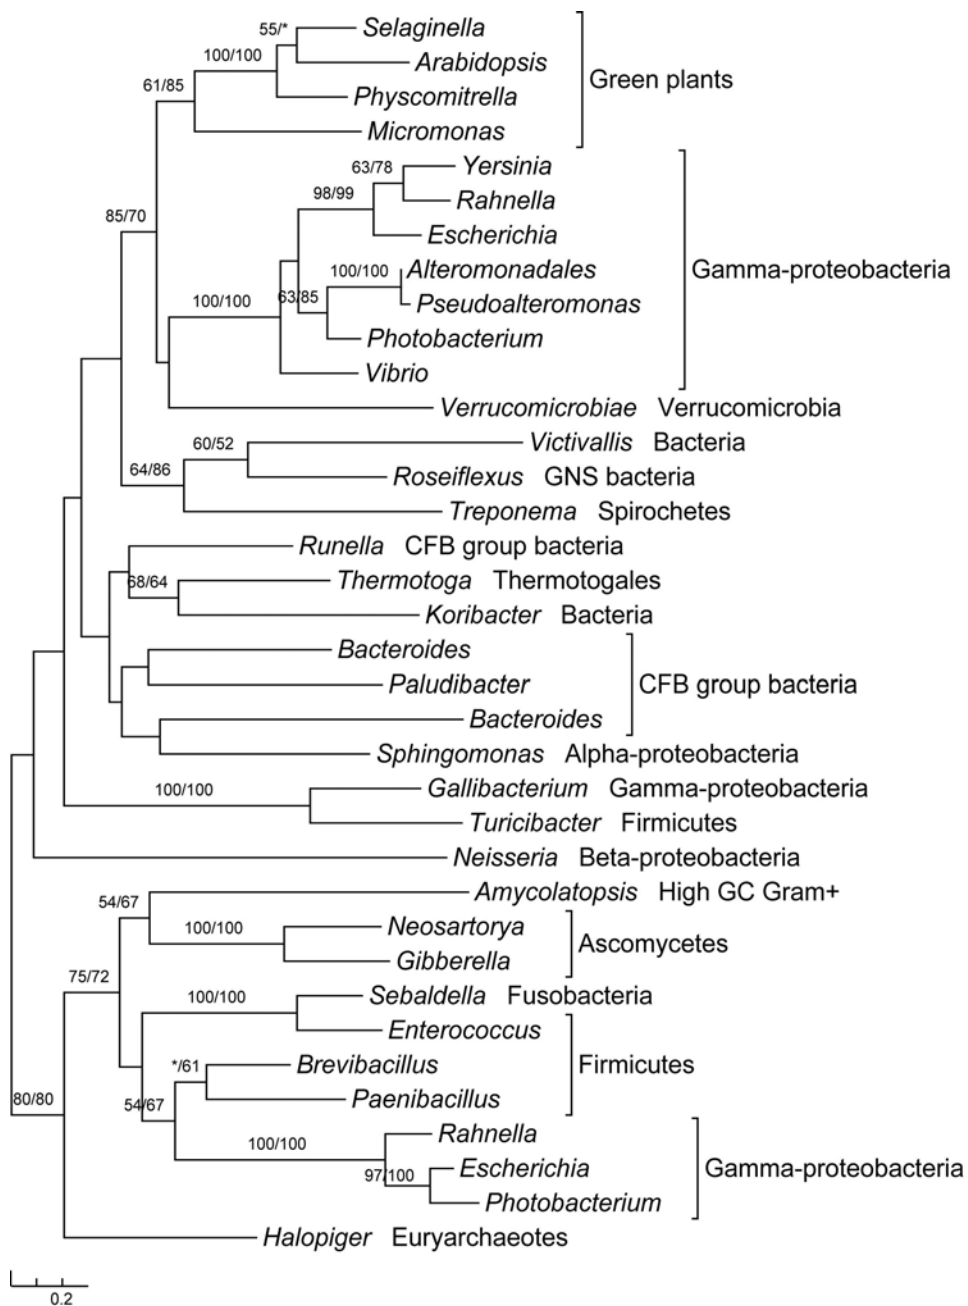

**Supplementary Figure S25. Molecular phylogeny of glycoside hydrolase family 2.**

Identifiable homologs of moss sequences are predominantly found in bacteria. *Physcomitrella* sequence (Genbank GI number 168036598) forms a clade with homologs of green plants, gamma-proteobacteria and verrucomicrobia. No cyanobacterial homologs were identified, suggesting that green plant sequences are unlikely of plastid (cyanobacterial) origin. Two fungal sequences form another moderately supported clade with homologs from miscellaneous bacteria.

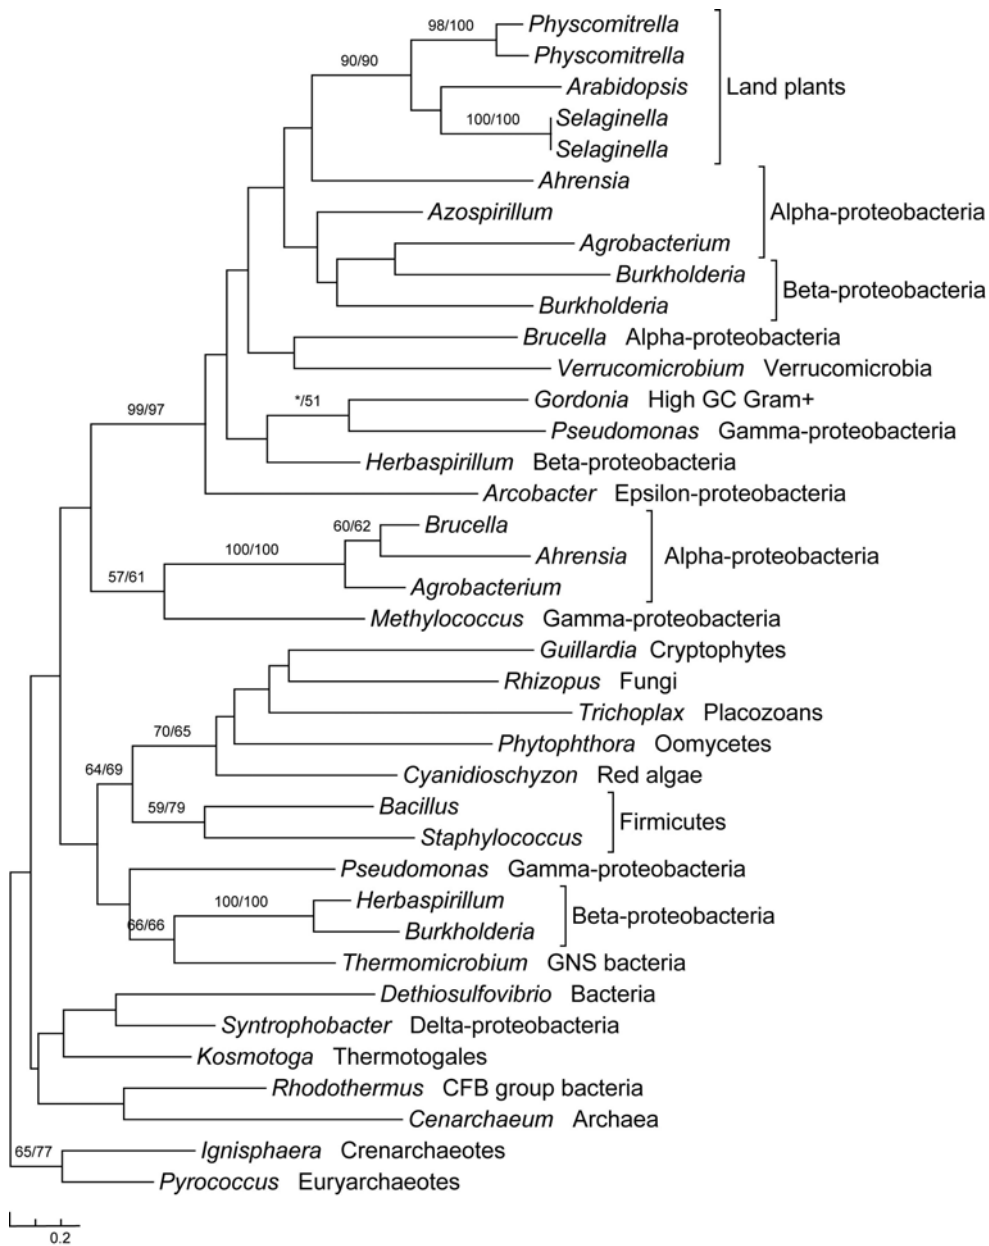

**Supplementary Figure S26. Molecular phylogeny of hydroxypyruvate reductase 2 (HPR2).**

*Physcomitrella* sequences (Genbank GI numbers 167997717, 168037243) form a strongly supported monophyletic group with land plant and bacterial homologs. This relationship is supported by several conserved amino acid residues and shared indels. Several other eukaryotic sequences form a moderately supported clade with bacterial homologs. Some of these eukaryotic sequences were predicted by TargetP to be mitochondrial precursors, suggesting that they are likely of mitochondrial (alpha-proteobacterial) origin.

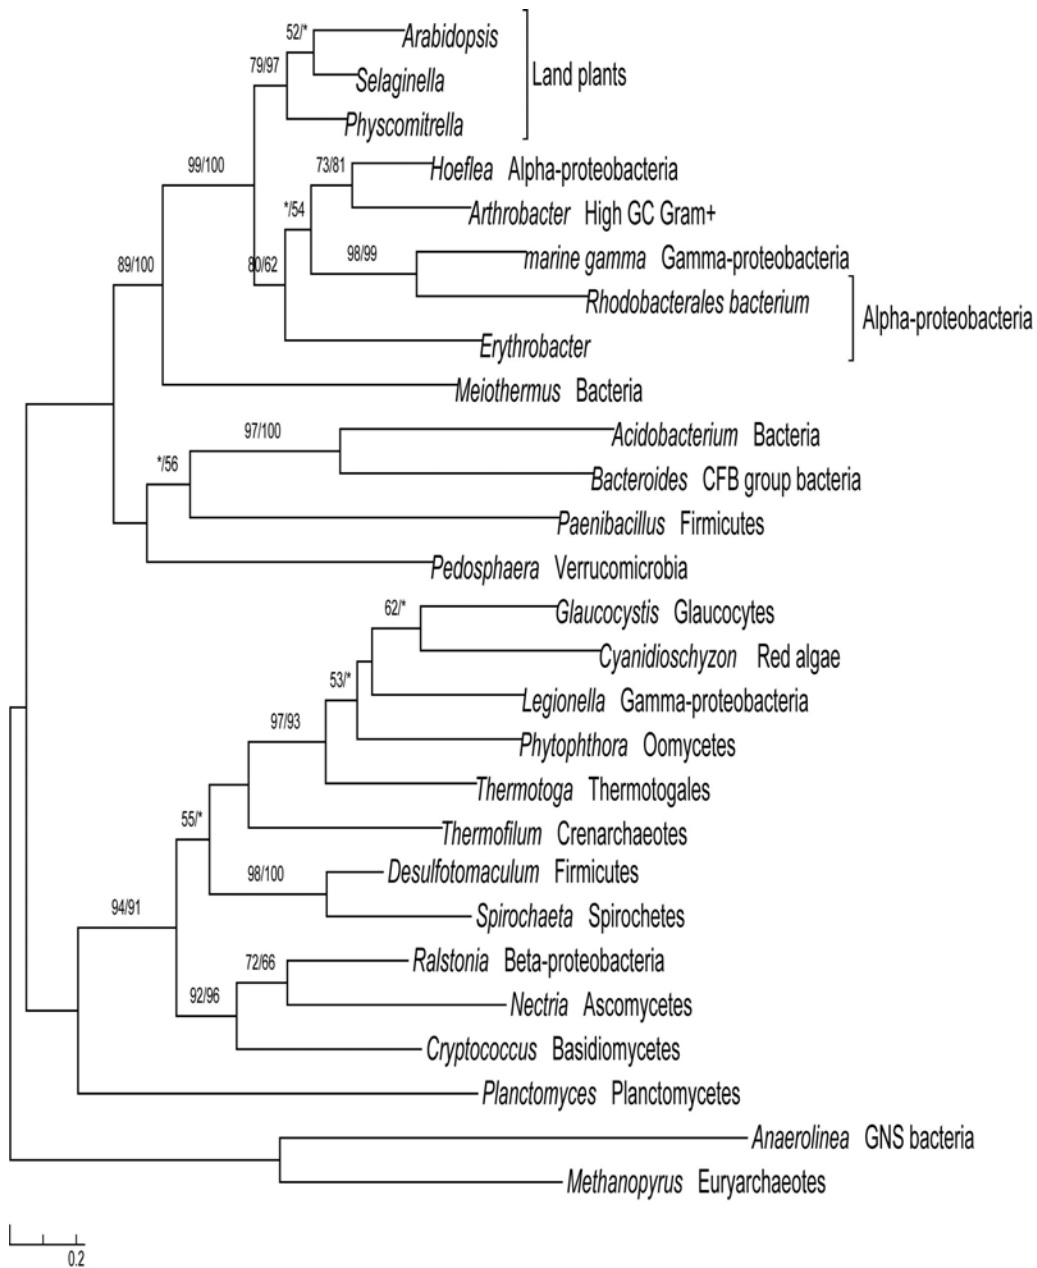

**Supplementary Figure S27. Molecular phylogeny of inositol 2-dehydrogenase like protein.**

*Physcomitrella* sequence (Genbank GI number 168003329) forms a clade with homologs from land plants and bacteria (mostly alpha-proteobacteria). Their relationship is also supported by several conserved amino acid residues and shared indels. Several other eukaryotic sequences group with bacterial and archaeal homologs. Some of these eukaryotic sequences are predicted by TargetP as mitochondrial precursors, indicating likely mitochondrial origin.

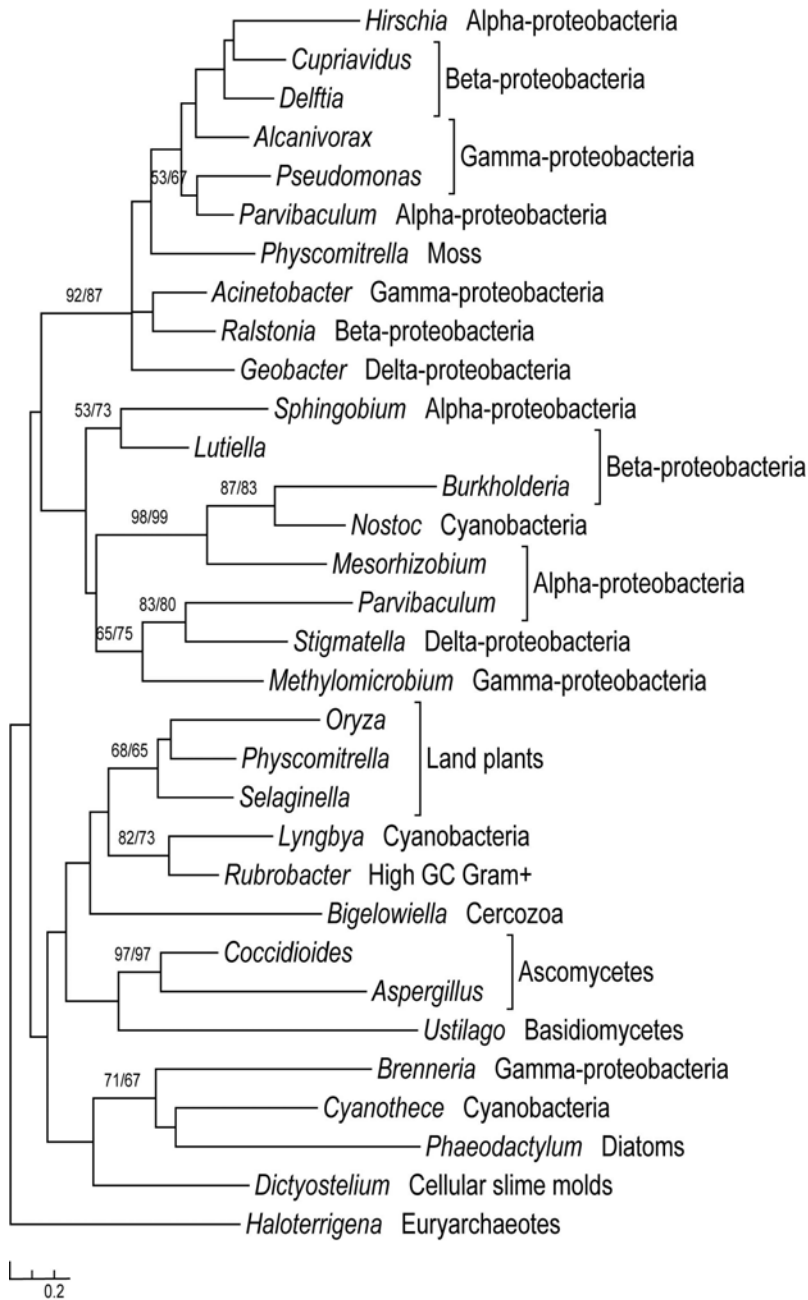

**Supplementary Figure S28. Molecular phylogeny of short-chain dehydrogenase/reductase SDR.** Identifiable homologs of *Physcomitrella* sequences are predominantly found in bacteria. *Physcomitrella* sequence (Genbank GI number 168031790) groups within a large bacterial clade. Another *Physcomitrella* copy (GI number 168036475) groups with other eukaryotic and bacterial homologs. Some of these eukaryotic sequences are predicted by TargetP to be mitochondrial precursors, suggesting that they are likely of mitochondrial (alpha-proteobacterial) origin.

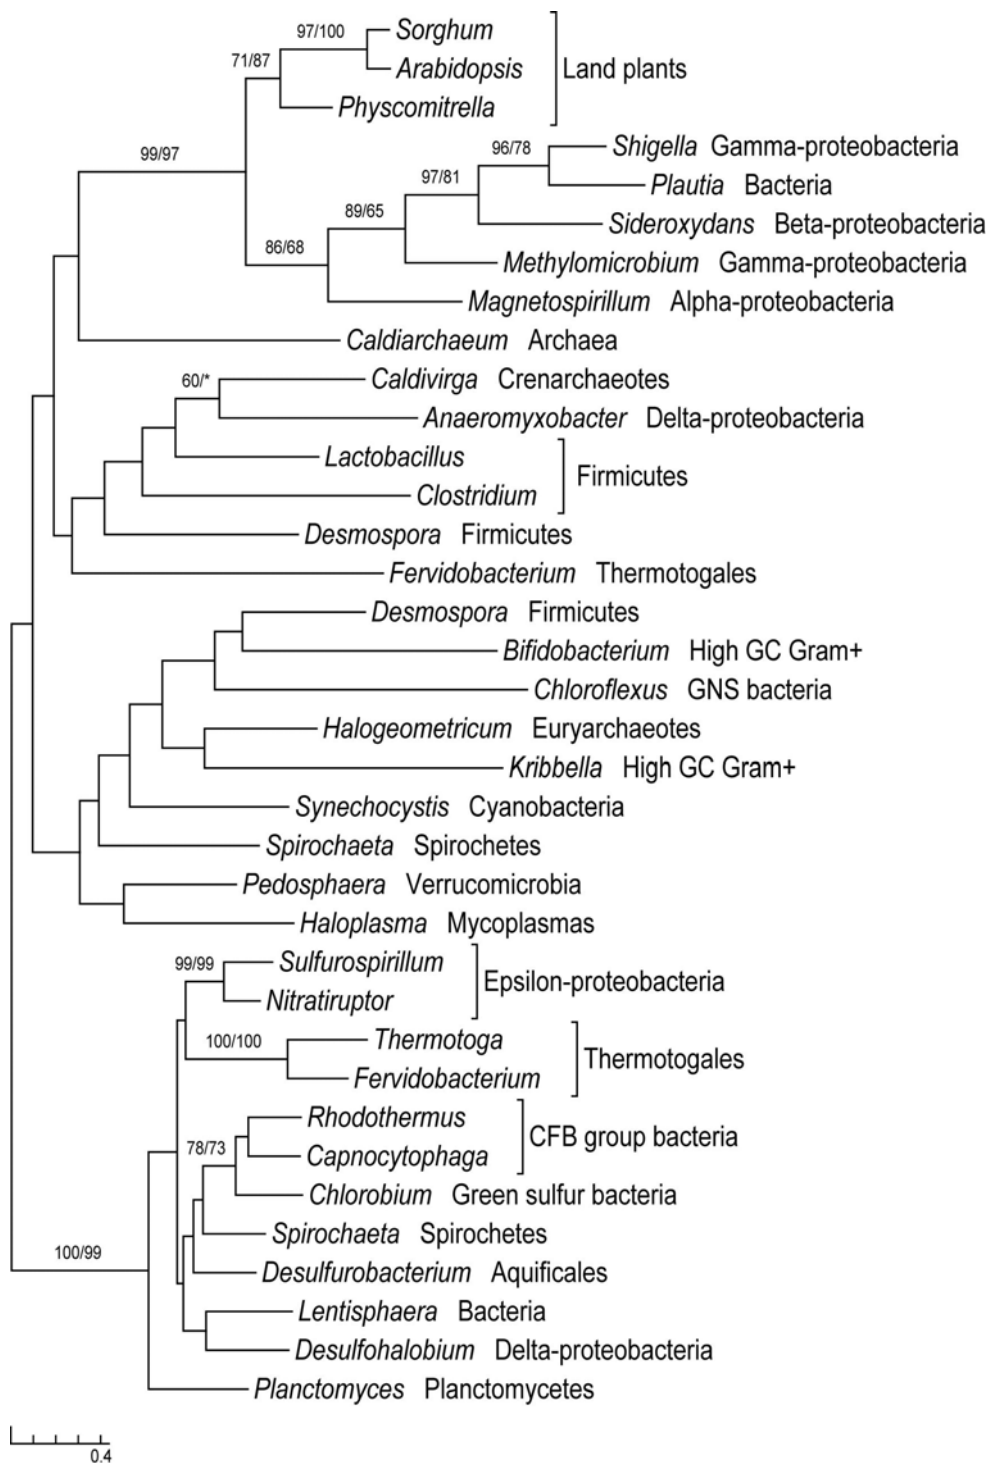

**Supplementary Figure S29. Molecular phylogeny of ATP-binding cassette II (ABCII) transporter.** Identifiable homologs were only found in land plants and bacteria. *Physcomitrella* sequence (Genbank GI number 168004297) forms a highly supported monophyletic group with land plant and proteobacterial homologs, and their relationship is supported by several conserved amino acid residues and shared indels.

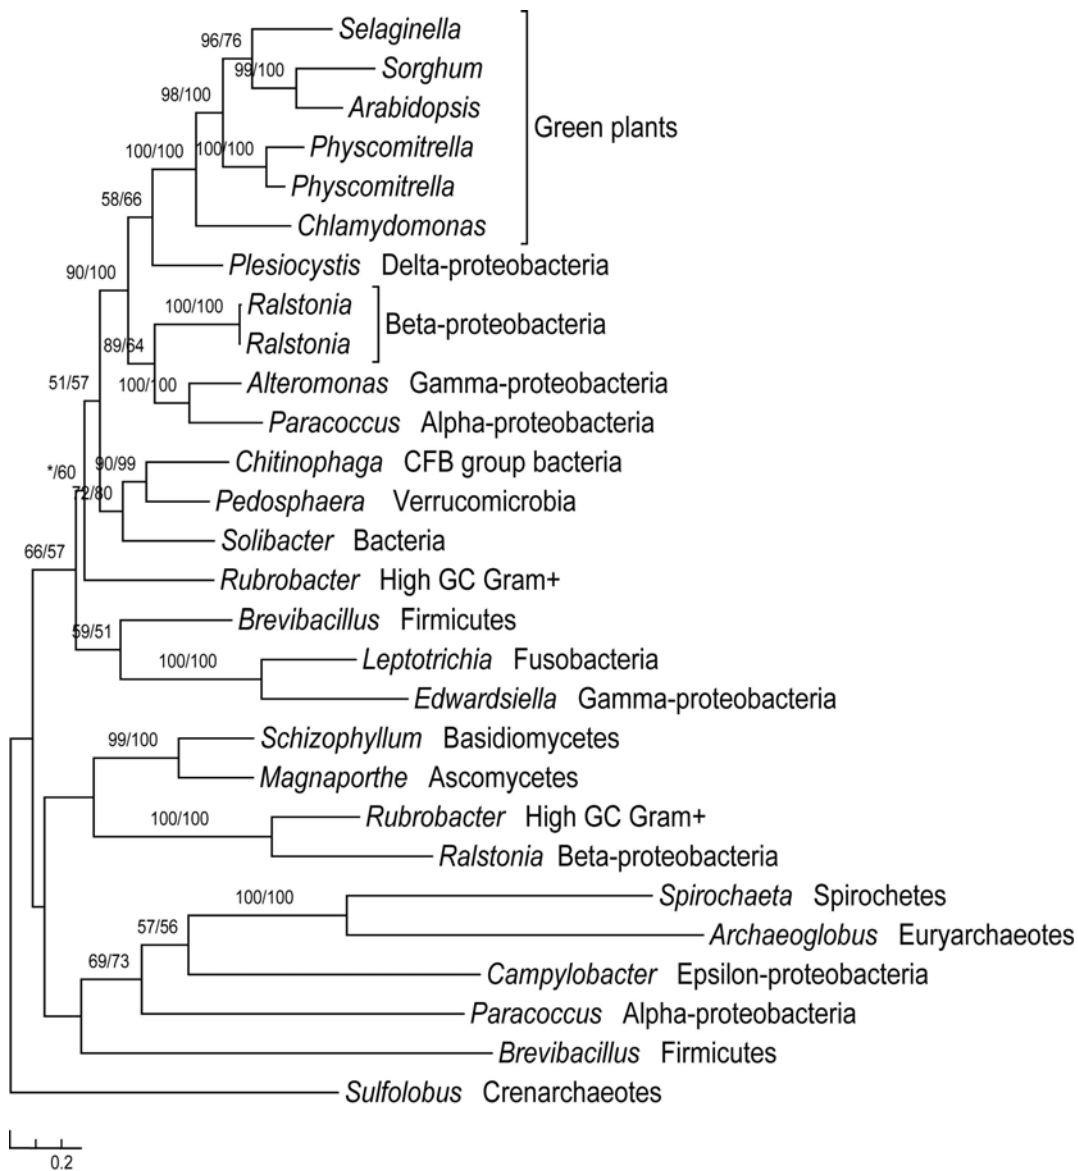

**Supplementary Figure S30. Molecular phylogeny of uracil permease.** *Physcomitrella* sequences (Genbank GI numbers 168012184, 168043133) form a highly supported clade with homologs from green plants and proteobacteria. This relationship is supported by several conserved amino acid residues and shared indels.

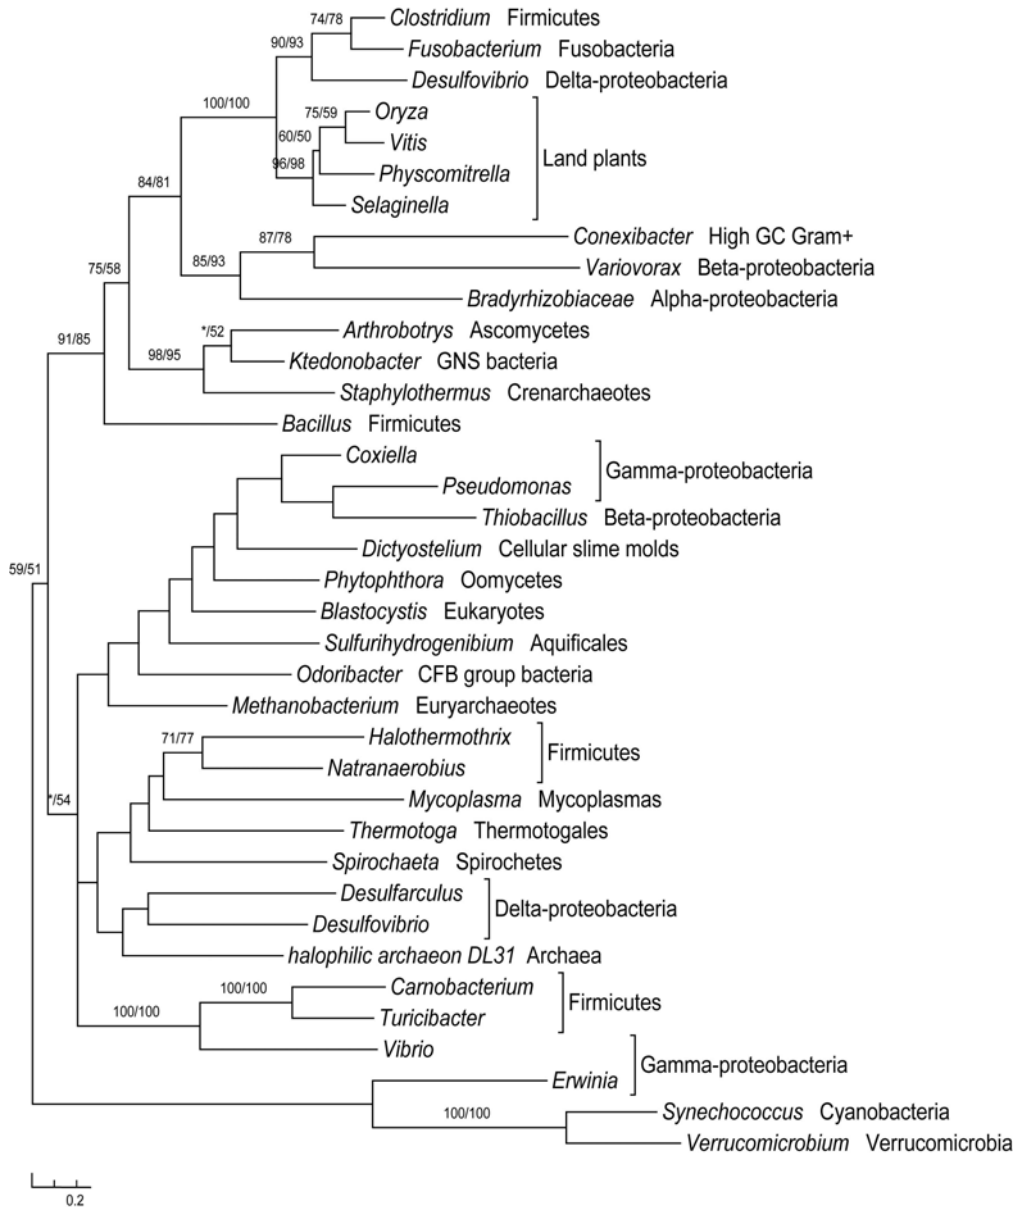

**Supplementary Figure S31. Molecular phylogeny of amidohydrolase family.** *Physcomitrella* sequence (Genbank GI number 168021897) forms a highly supported clade with homologs from other land plants and miscellaneous bacteria. This relationship is supported by multiple conserved amino acid residues and shared indels. Several other eukaryotic sequences group within bacterial homologs. Some of these eukaryotic sequences are predicted by TargetP to be mitochondrial precursors, indicating a likely mitochondrial or alpha-proteobacterial origin.



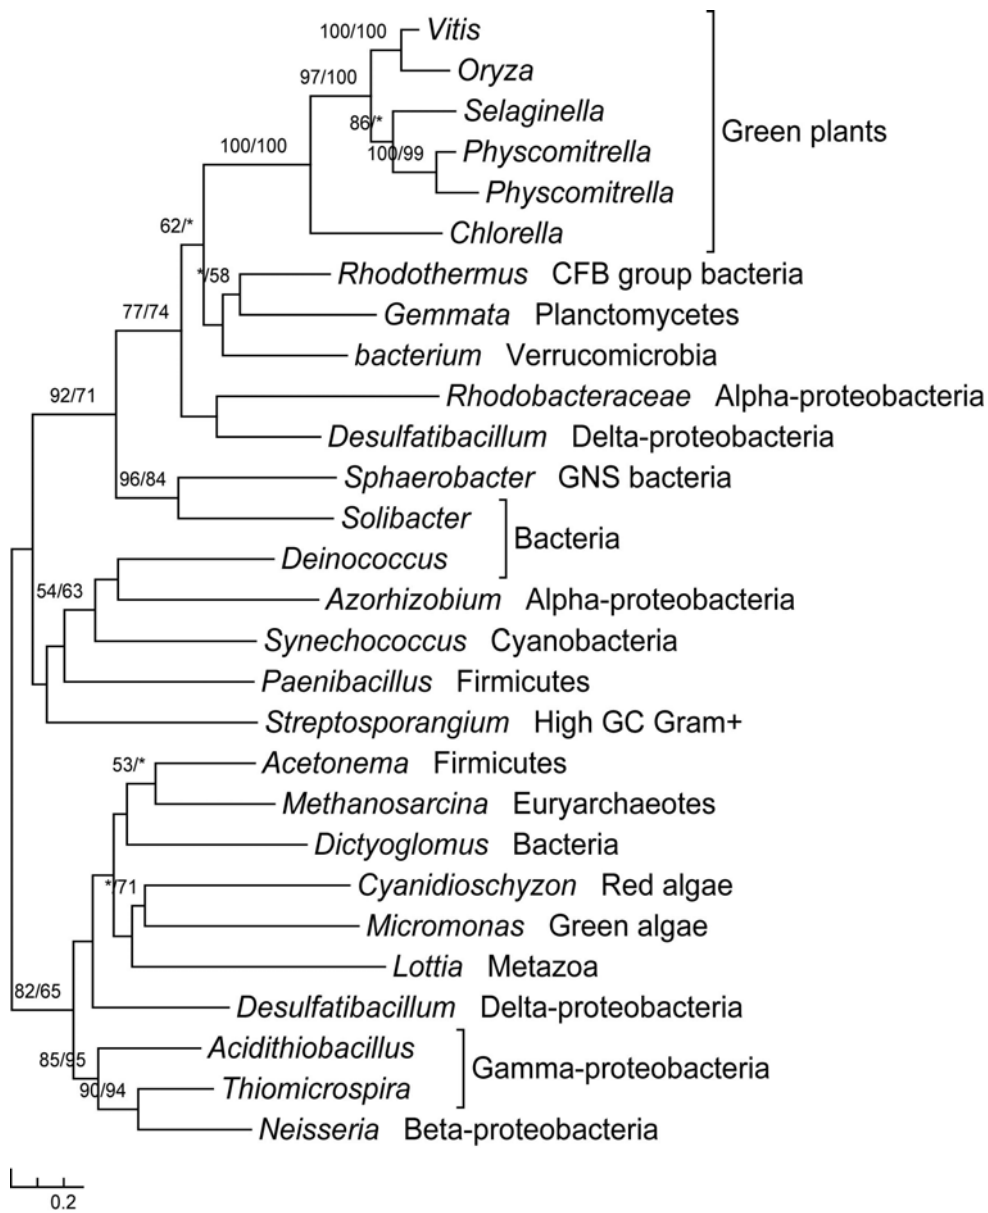

**Supplementary Figure S32. Molecular phylogeny of amidase family.** *Physcomitrella* sequences (Genbank GI numbers 168042262, 168003211) form a highly supported clade with homologs from green plants and bacteria. Their relationship is also supported by multiple conserved amino acid residues and shared indels. Several other eukaryotic sequences form a clade with bacterial homologs. Some of them are predicted by TargetP to be mitochondrial precursors, indicating a likely mitochondrial origin.

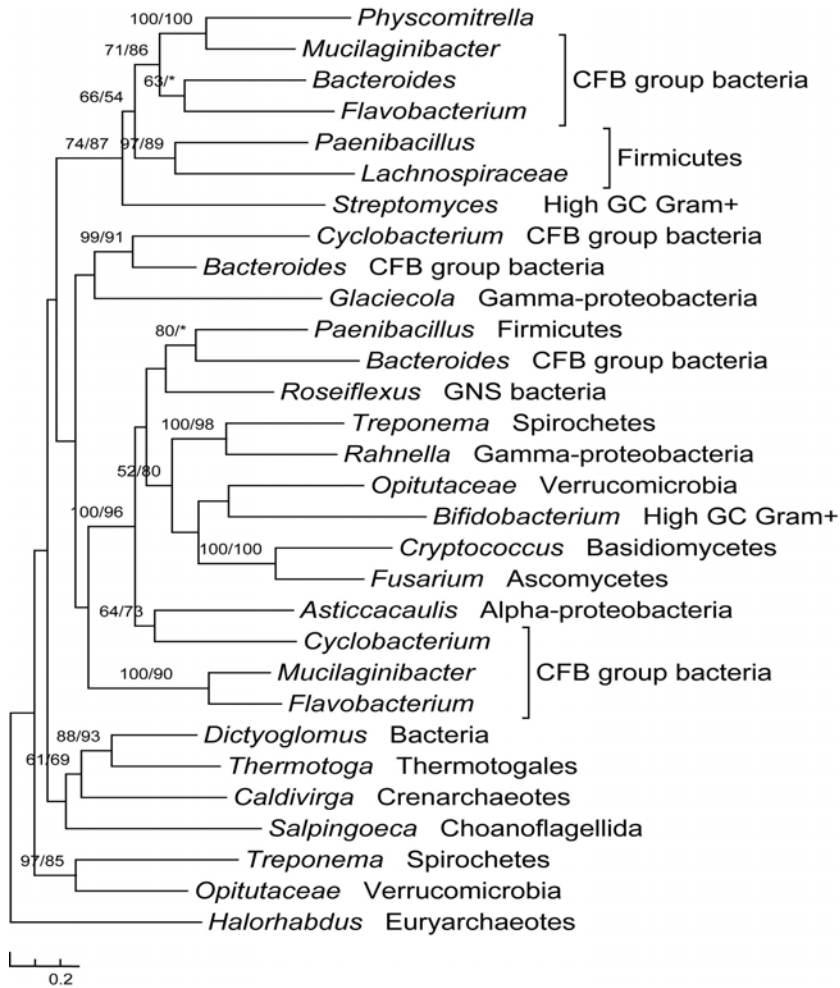

**Supplementary Figure S33. Molecular phylogeny of alpha-L-rhamnosidase.** Identifiable homologs of the *Physcomitrella* sequence are predominantly found in bacteria. *Physcomitrella* sequence (Genbank GI number 168031461) has 49% identity with homolog of *Mucilaginibacter paludis*, these two sequences form a highly supported monophyletic group.

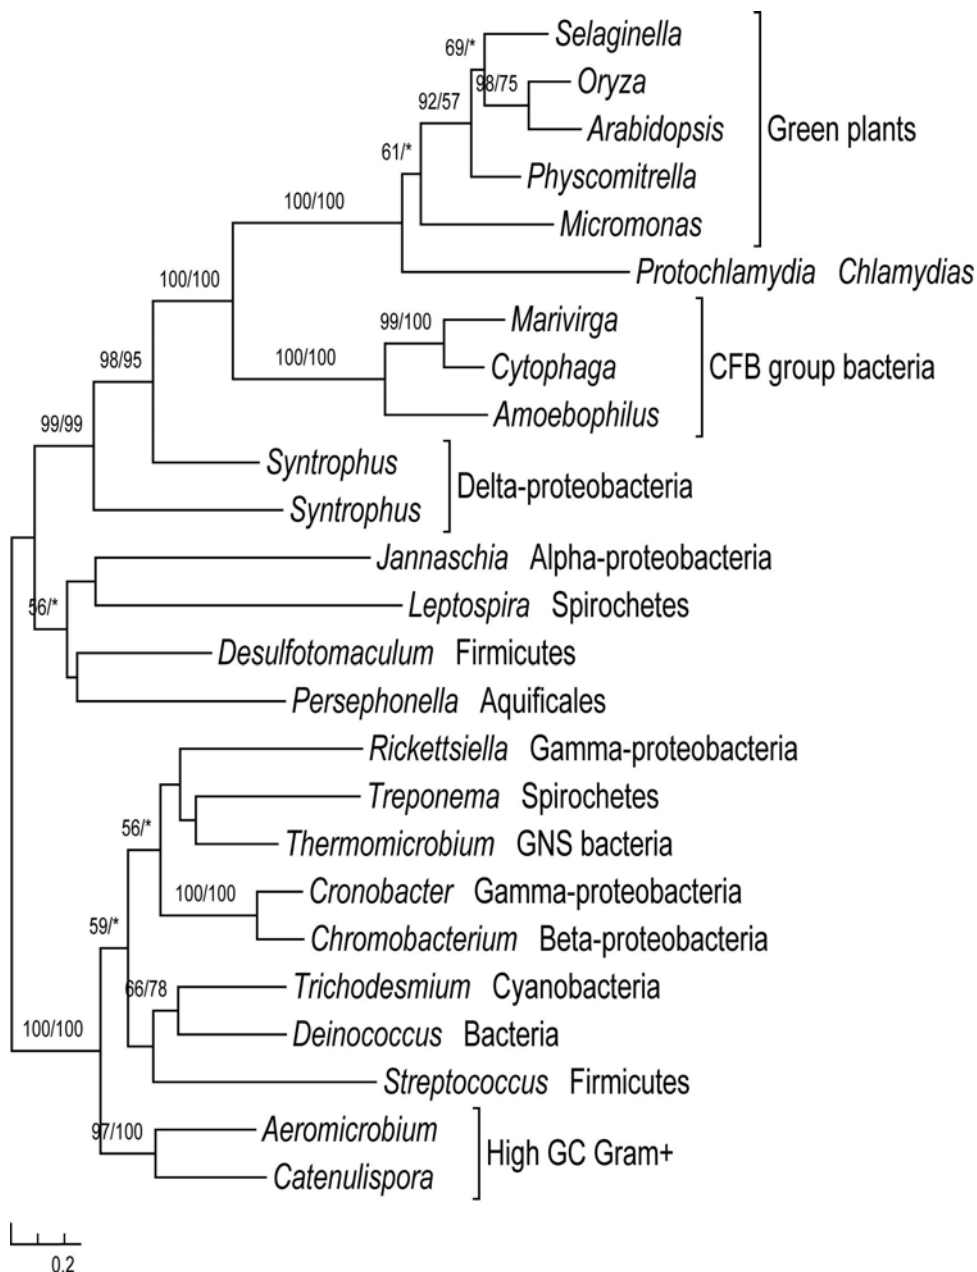

**Supplementary Figure S34. Molecular phylogeny of D-alanine-D-alanine ligase.** *Physcomitrella* sequence (Genbank GI number 168012025) forms a highly supported clade with homologs from other green plants, *Protochlamydia* and CFB bacteria. Identifiable homologs of the *Physcomitrella* sequence were only found in green plants and bacteria.

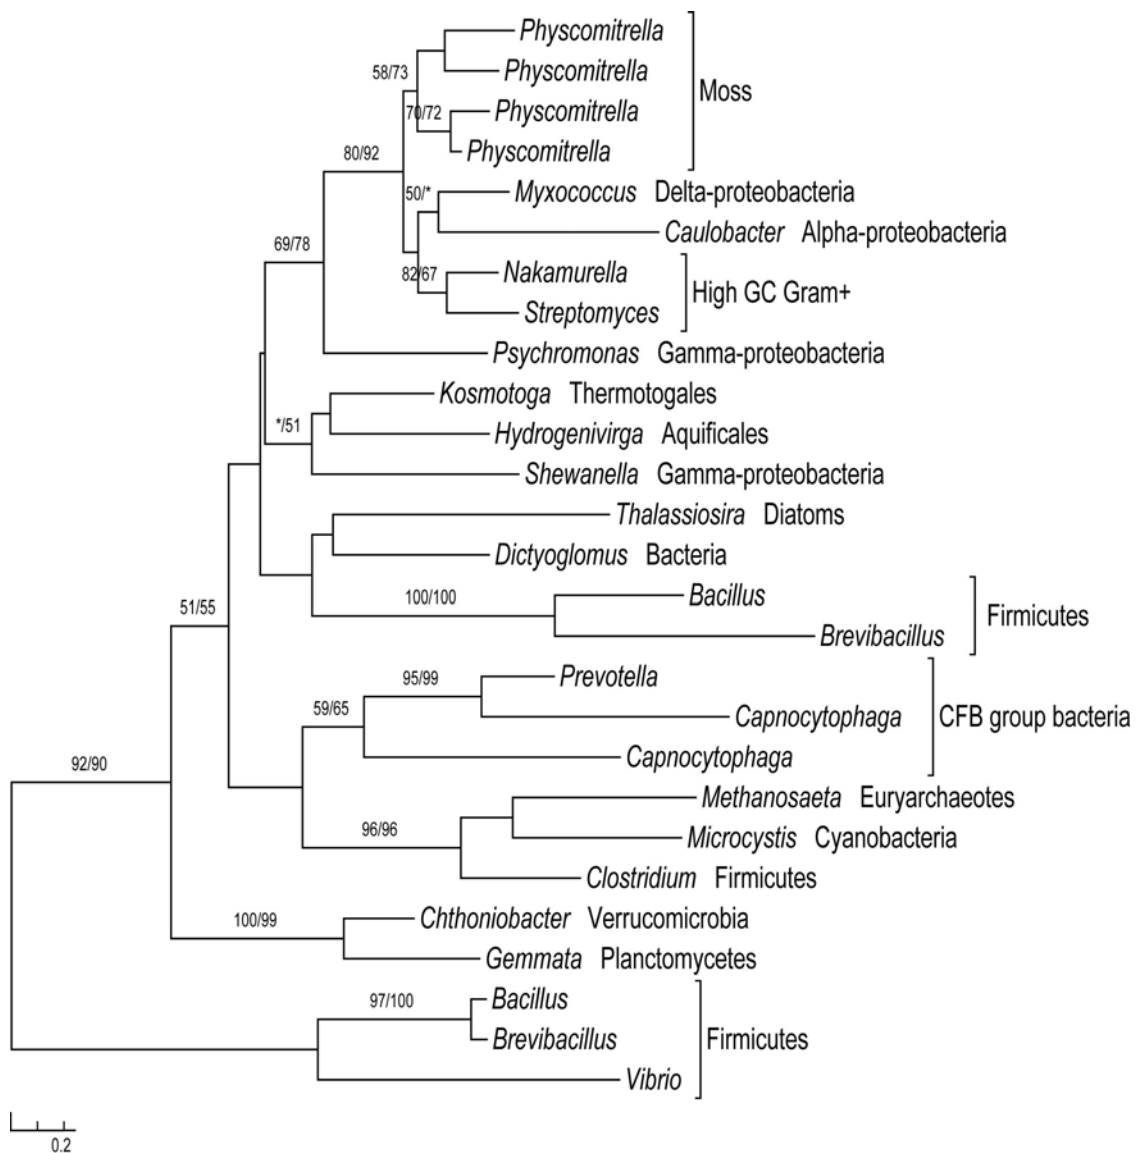

**Supplementary Figure S35. Molecular phylogeny of M6 family peptidase.** Identifiable homologs of *Physcomitrella* sequences are predominantly found in bacteria. *Physcomitrella* sequences (Genbank GI numbers 168013514, 168019010, 168032091, 168048759) form a clade with homologs from proteobacteria and high GC gram positive bacteria. Their relationship is supported by multiple conserved amino acid residues and shared indels. Other than two diatom sequences, no other eukaryotic homologs were found.

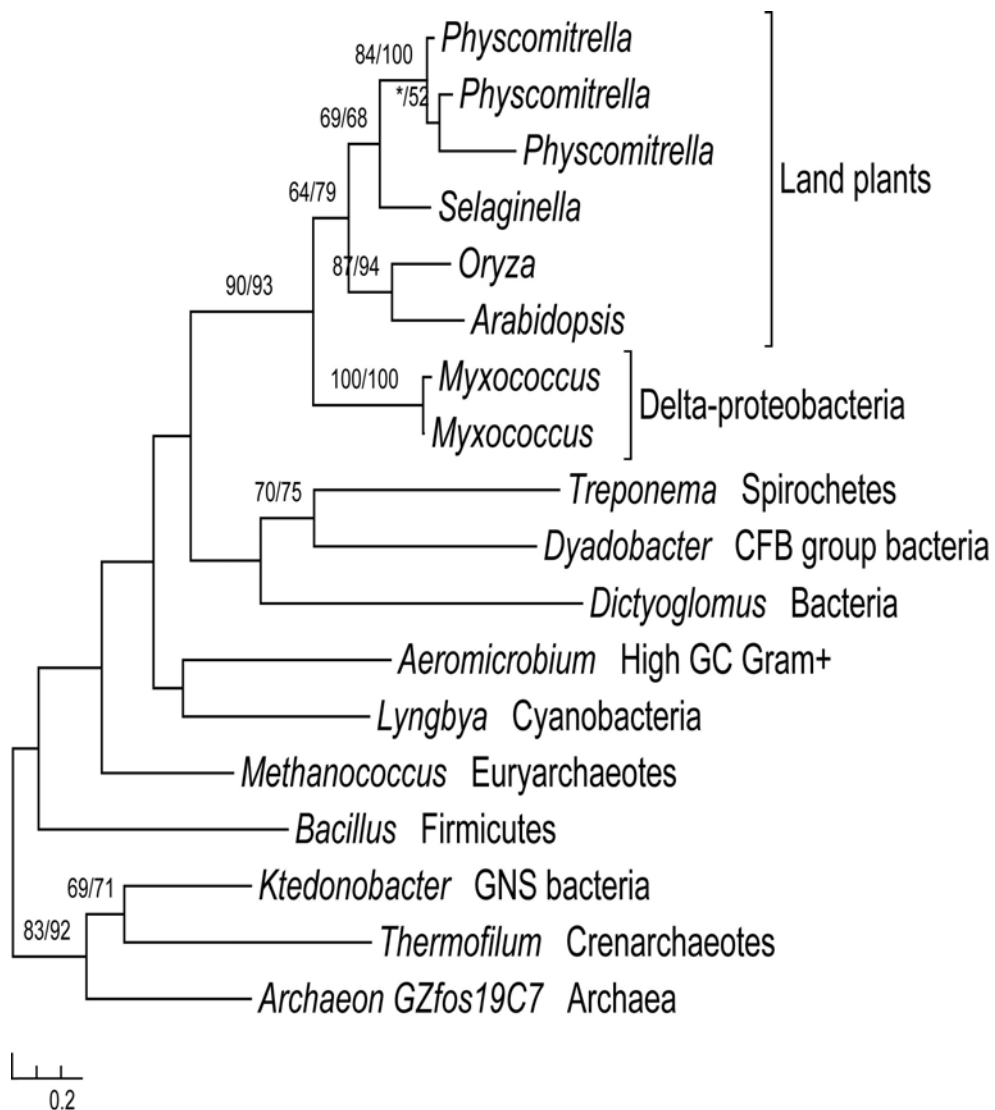

**Supplementary Figure S36. Molecular phylogeny of PfkB family kinase.** *Physcomitrella* sequences (Genbank GI numbers 167998254, 168016595, 168021833) form a highly supported clade with homologs from other land plants and delta-proteobacteria. No other eukaryotic homologs were identified.

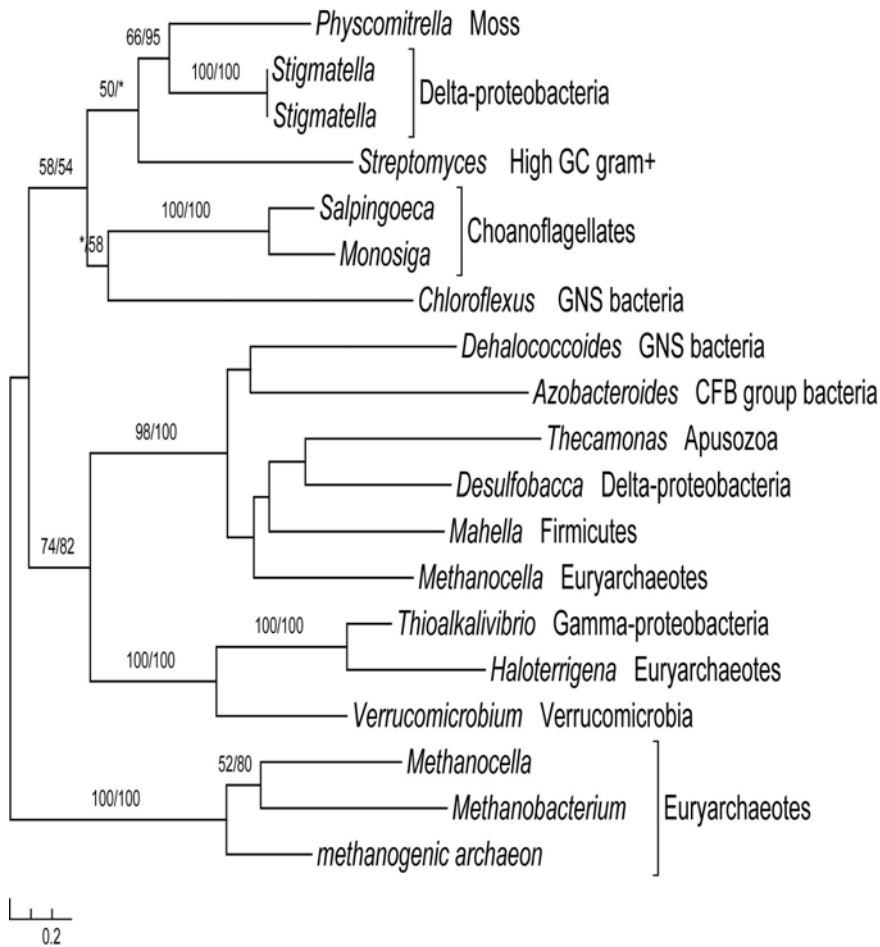

**Supplementary Figure S37. Molecular phylogeny of 1, 4-dihydroxy-2-naphtoate octaprenyl transferase.** *Physcomitrella* sequence (Genbank GI number 168009868) has 42-46% identity with homologs from the delta-proteobacterial *Stigmatella*. These sequences form a clade.

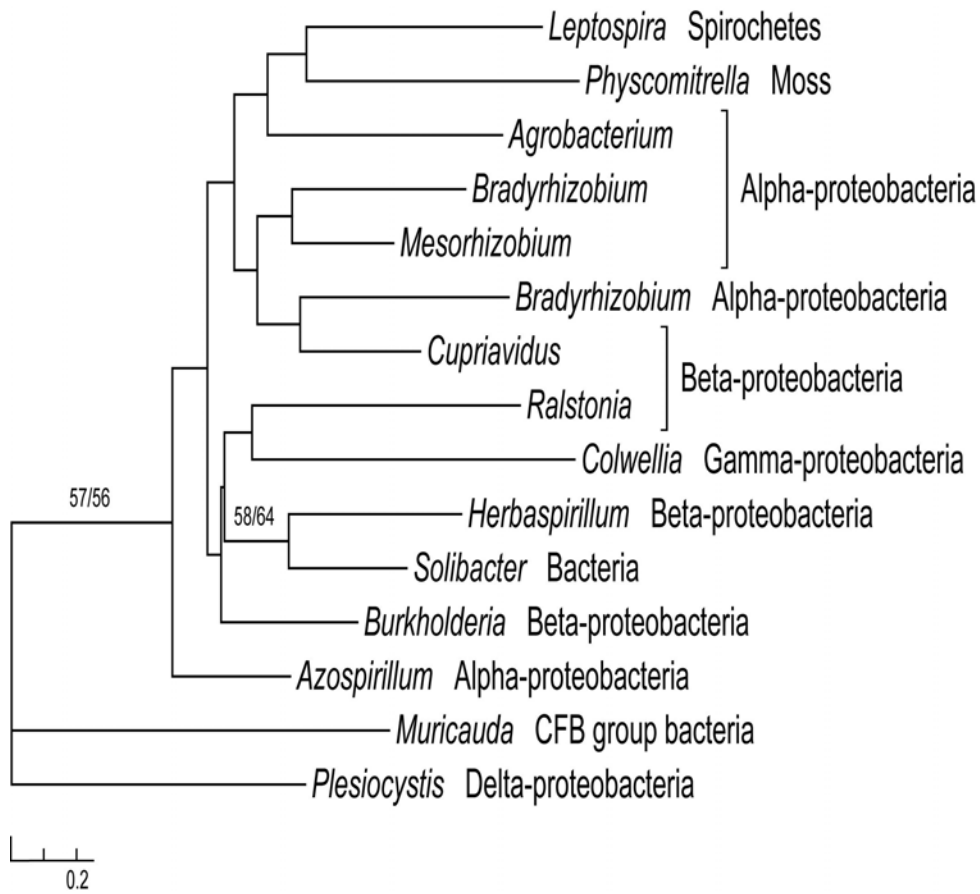

**Supplementary Figure S38. Molecular phylogeny of diene lactone hydrolase family.**

Identifiable homologs were only found in *Physcomitrella* and bacteria. Because only 103 reliably aligned amino acid residues were used to construct the phylogeny, the bootstrap values for most clades identified in the phylogenetic tree are low. The *Physcomitrella* sequence is located on a long scaffold and therefore should not result from sequence contamination.

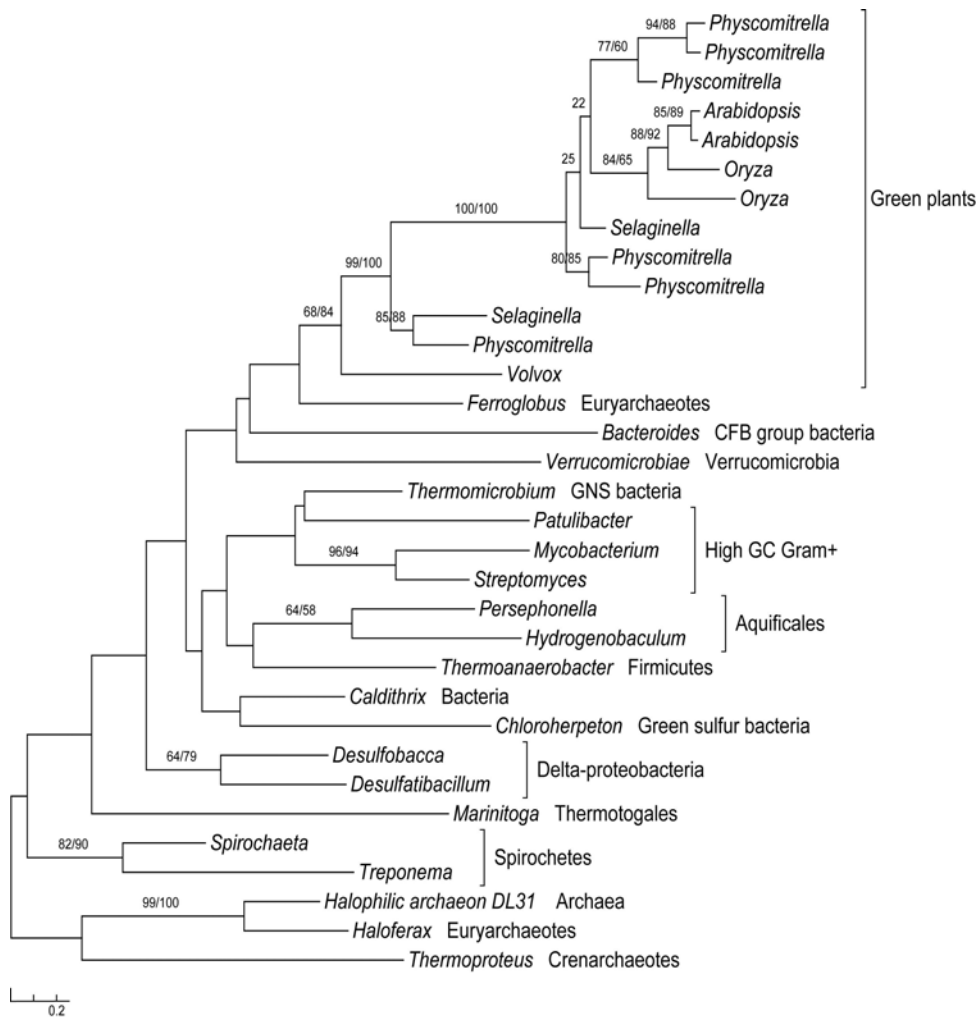

**Supplementary Figure S39. Molecular phylogeny of wound-responsive family protein.**

Identifiable homologs were only found in green plants and prokaryotes. *Physcomitrella* sequences (Genbank GI numbers 168031639, 168046102, 168006875, 168012338, 168023049, 168014136) form a clade with homologs from other green plants. Only 95 reliably aligned amino acid residues was used to construct the phylogeny, therefore the support values for most clades are generally low. No cyanobacterial homologs were found, indicating that this gene family in green plants is unlikely of plastid (cyanobacterial) origin.



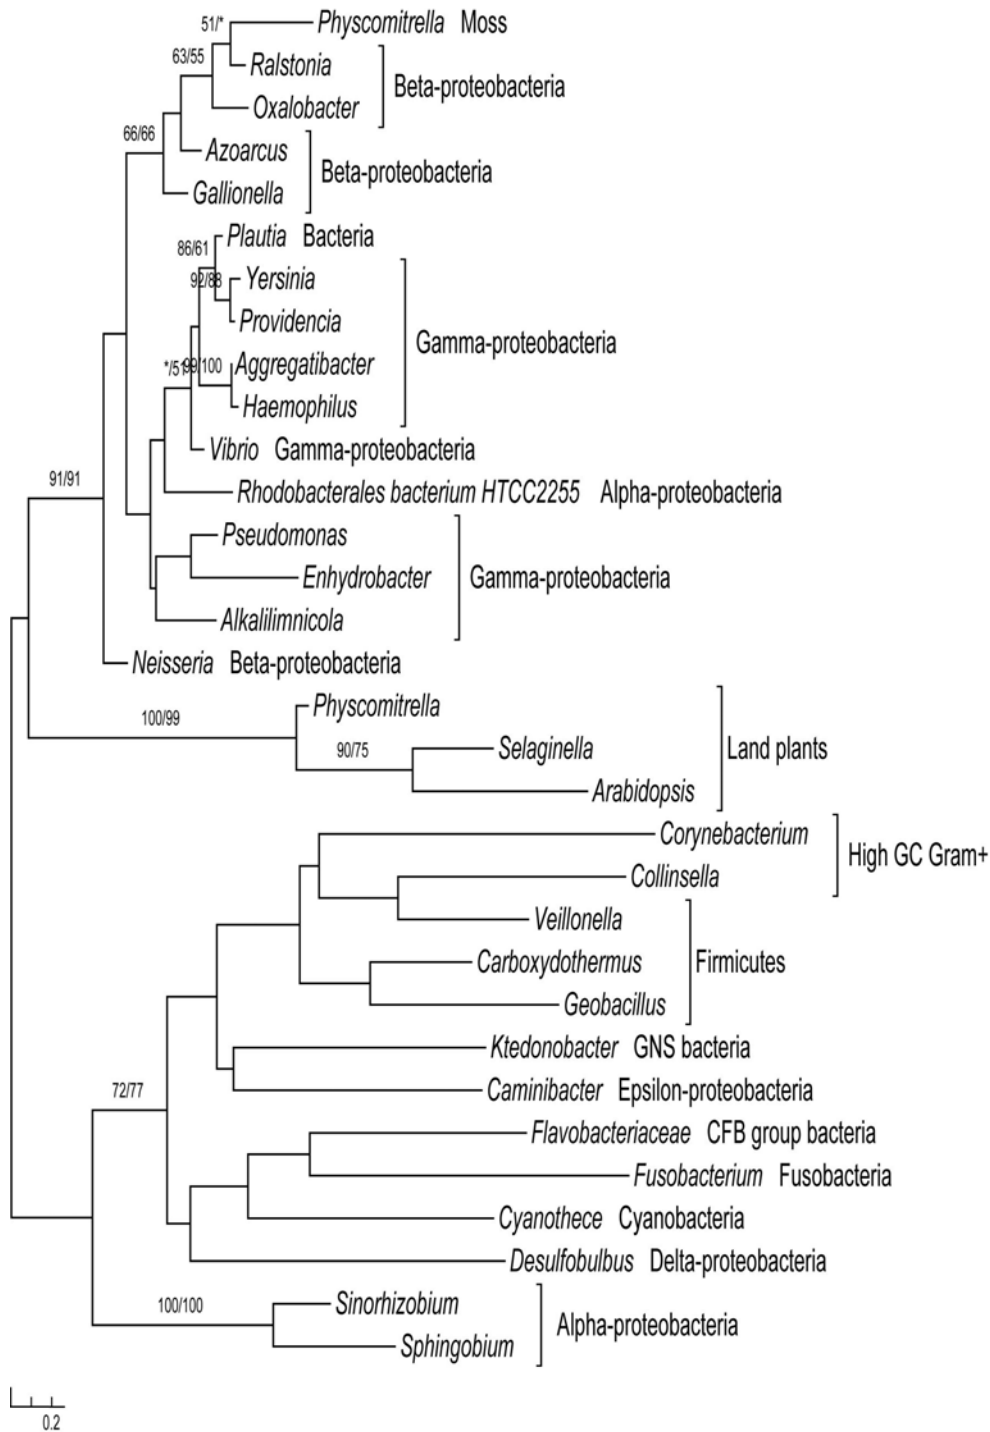

**Supplementary Figure S40. Molecular phylogeny of ribosomal protein S6.** One *Physcomitrella* sequence (Genbank GI number 162662263) forms a clade with homologs of proteobacteria and was likely acquired through HGT. Another *Physcomitrella* gene copy (Genbank GI number 168013078) form a clade with other land plant homologs. In *Arabidopsis*, this copy is annotated as regulator of fatty-acid composition 3 (RFC3) and is targeted to chloroplasts, suggesting the RFC3 in land plant is likely of plastid (cyanobacterial) origin.

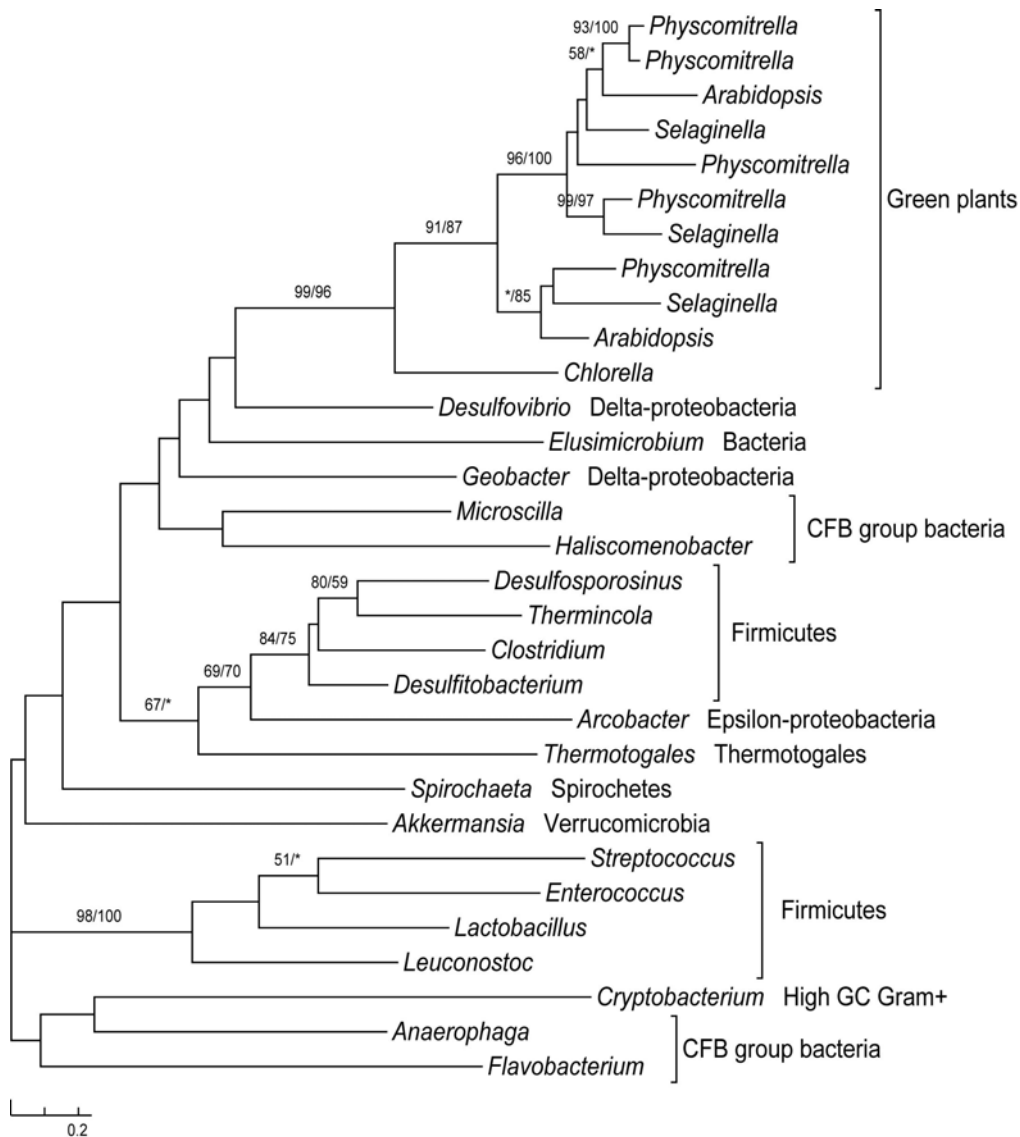

**Supplementary Figure S41. Molecular phylogeny of fatty acyl-ACP thioesterases B (FATB).**

Identifiable homologs of *Physcomitrella* sequences (Genbank GI numbers 167998911, 168035219, 168024004, 168044508, 168036485) were only found in green plants and bacteria. No cyanobacterial homologs were found, indicating that this gene family in green plants is unlikely of plastid (cyanobacterial) origin.

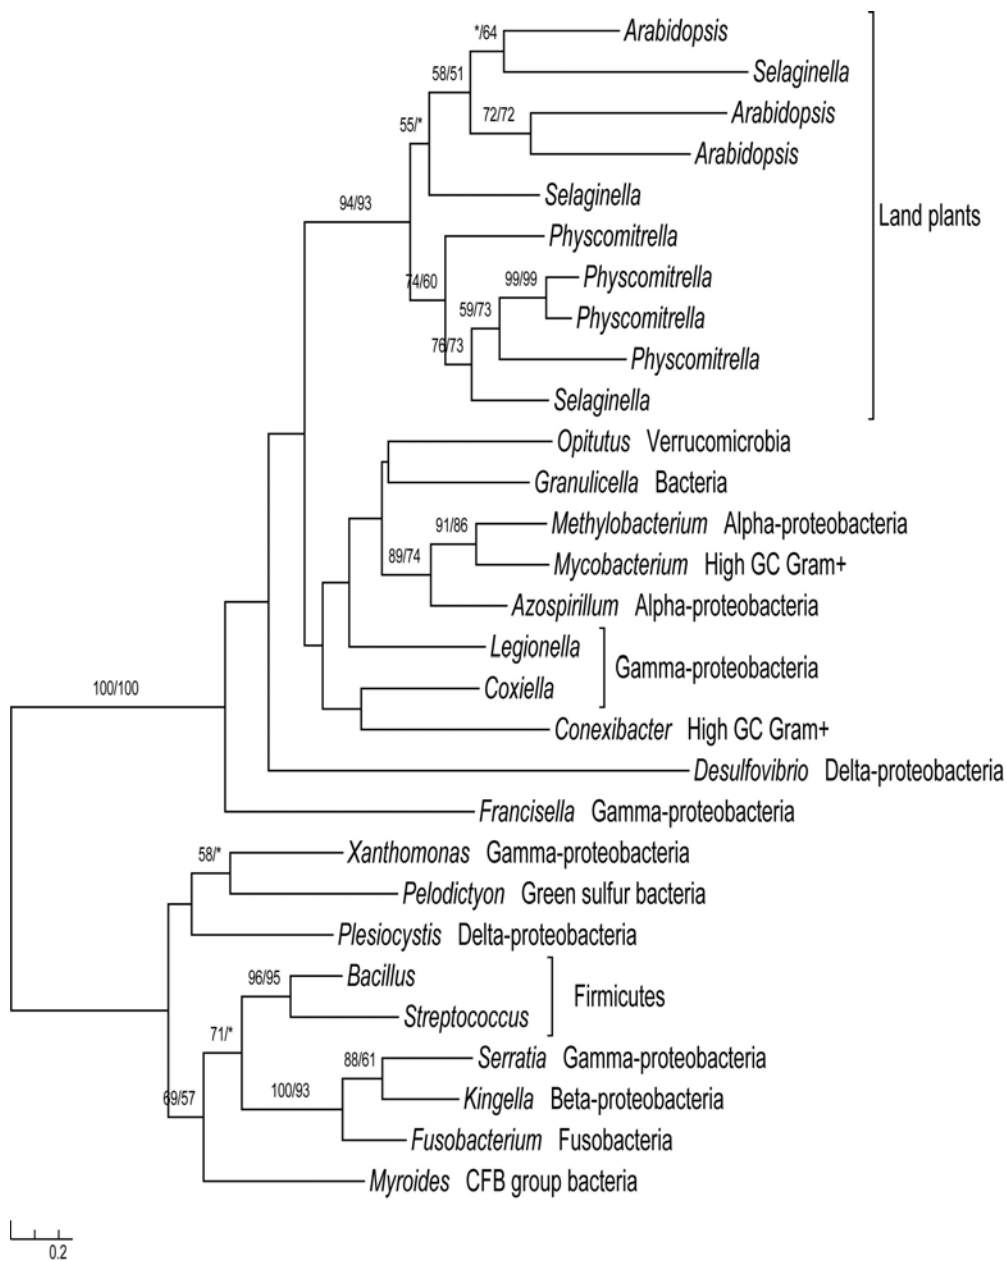

**Supplementary Figure S42. Molecular phylogeny of HAD superfamily, subfamily IIIB acid phosphatase.** *Physcomitrella* sequences (Genbank GI numbers 168062119, 168062518, 168033997, 168032668) form a highly supported clade with homologs of other land plants and bacteria. Their relationship is supported by several conserved amino acid residues and shared indels.

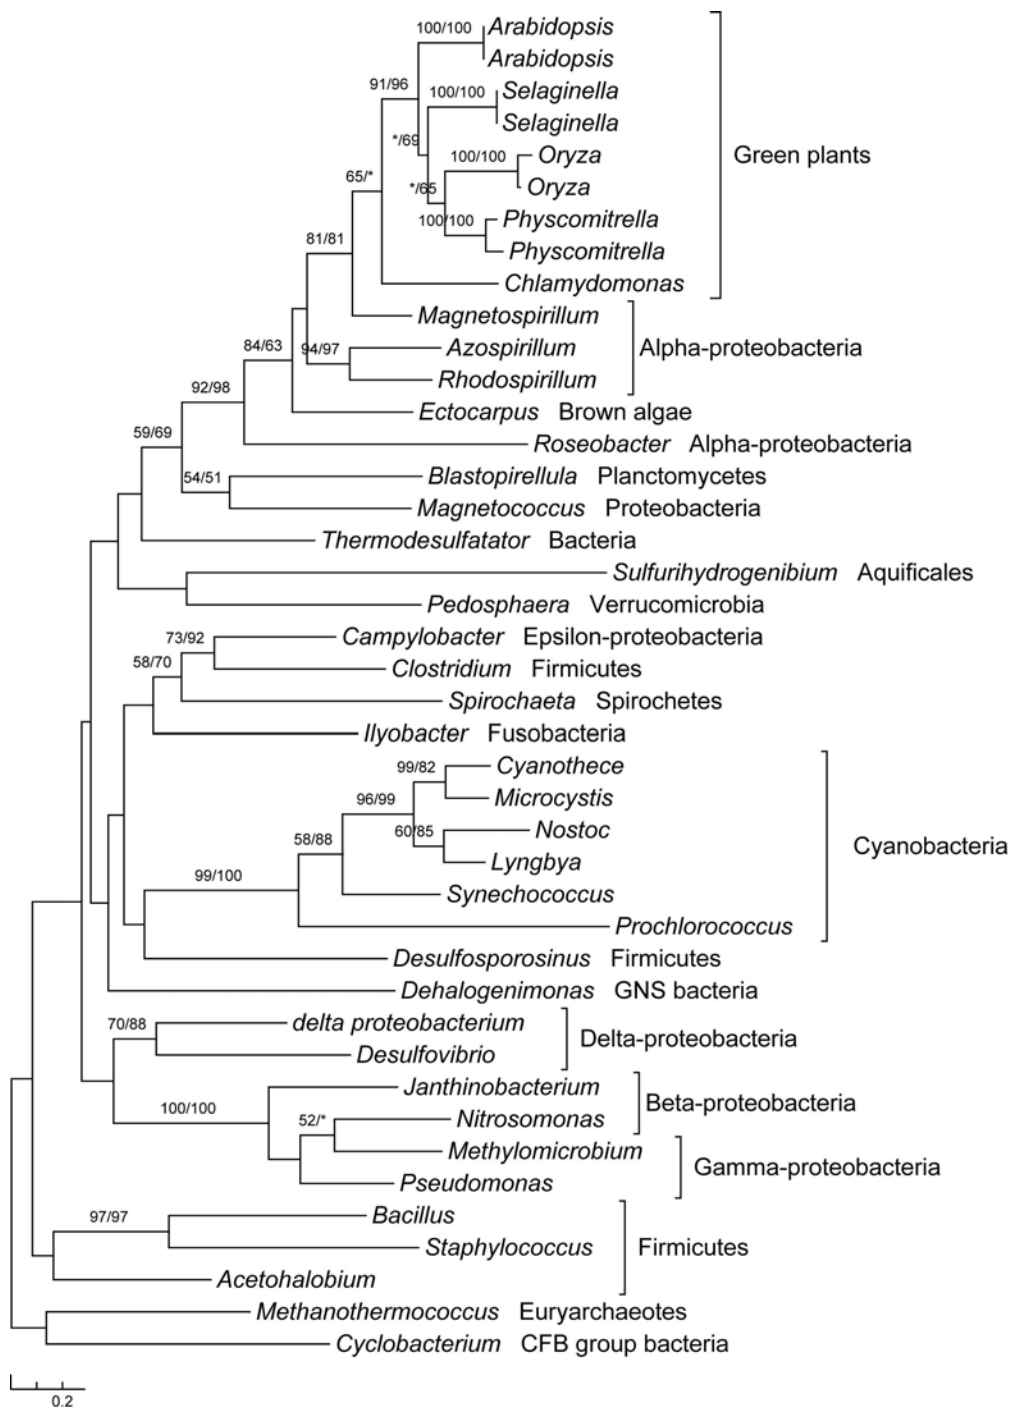

**Supplementary Figure S43. Molecular phylogeny of N-acetyl-gamma-glutamyl-phosphate reductase (*argC*).** *Physcomitrella* sequences (Genbank GI numbers 168037402, 168031643) form a clade with other green plant homologs, which is in turn related to alpha-proteobacterial homologs. It is likely that brown alga *Ectocarpus* acquired this gene through an independent HGT event. However, the scenario of gene duplication in the common ancestor of brown algae and green plants and subsequent differential gene losses cannot be confidently excluded.

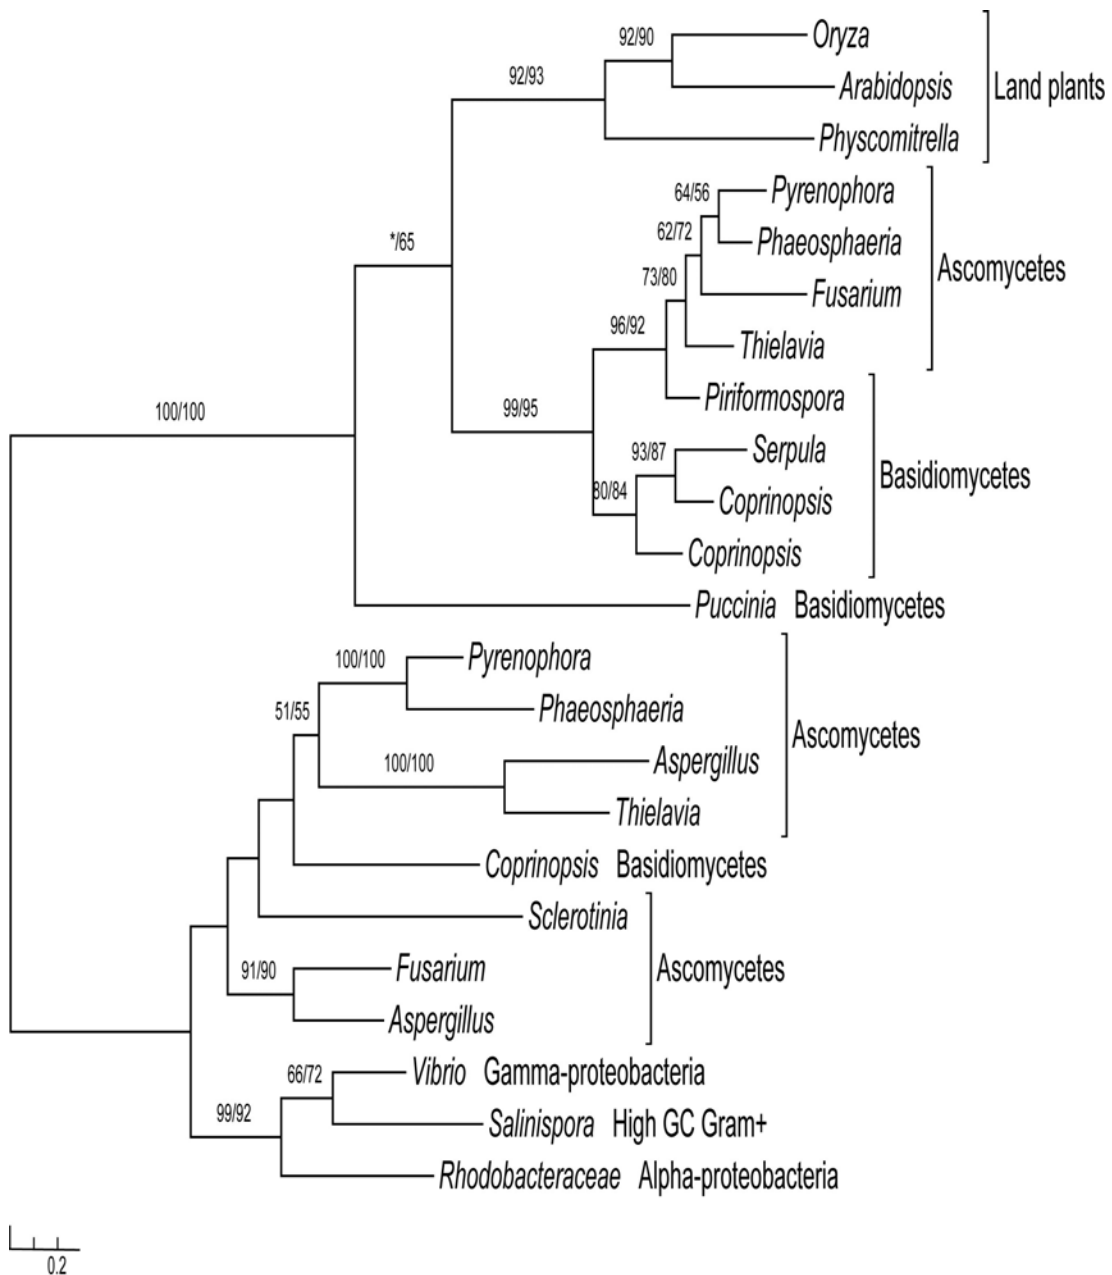

**Supplementary Figure S44. Molecular phylogeny of NRPS-like enzyme.** Identifiable homologs were only found in land plants, fungi and bacteria. *Physcomitrella* sequence (Genbank GI number 168054351) forms a highly supported clade with other land plant homologs, which in turn groups within the fungal clade.

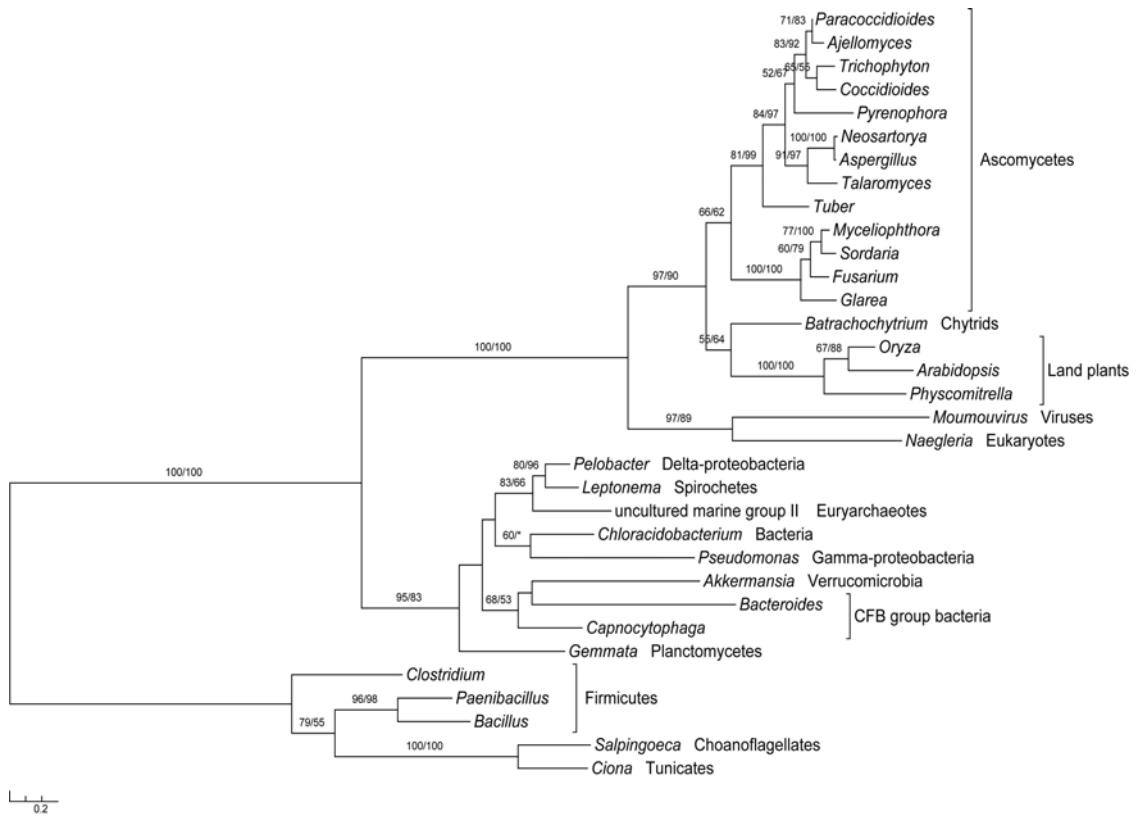

**Supplementary Figure S45. Molecular phylogeny of flotillin-like protein.** Identifiable homologs of *Physcomitrella* sequence are predominantly found in fungi and bacteria. *Physcomitrella* sequence (Genbank GI number 168017323) and other land plant sequences group within fungal homologs. These land plant and fungal sequences form a highly supported clade. *Naegleria* sequence is closely related to *Moumouvirus* homolog and they also share multiple conserved amino acid residues.

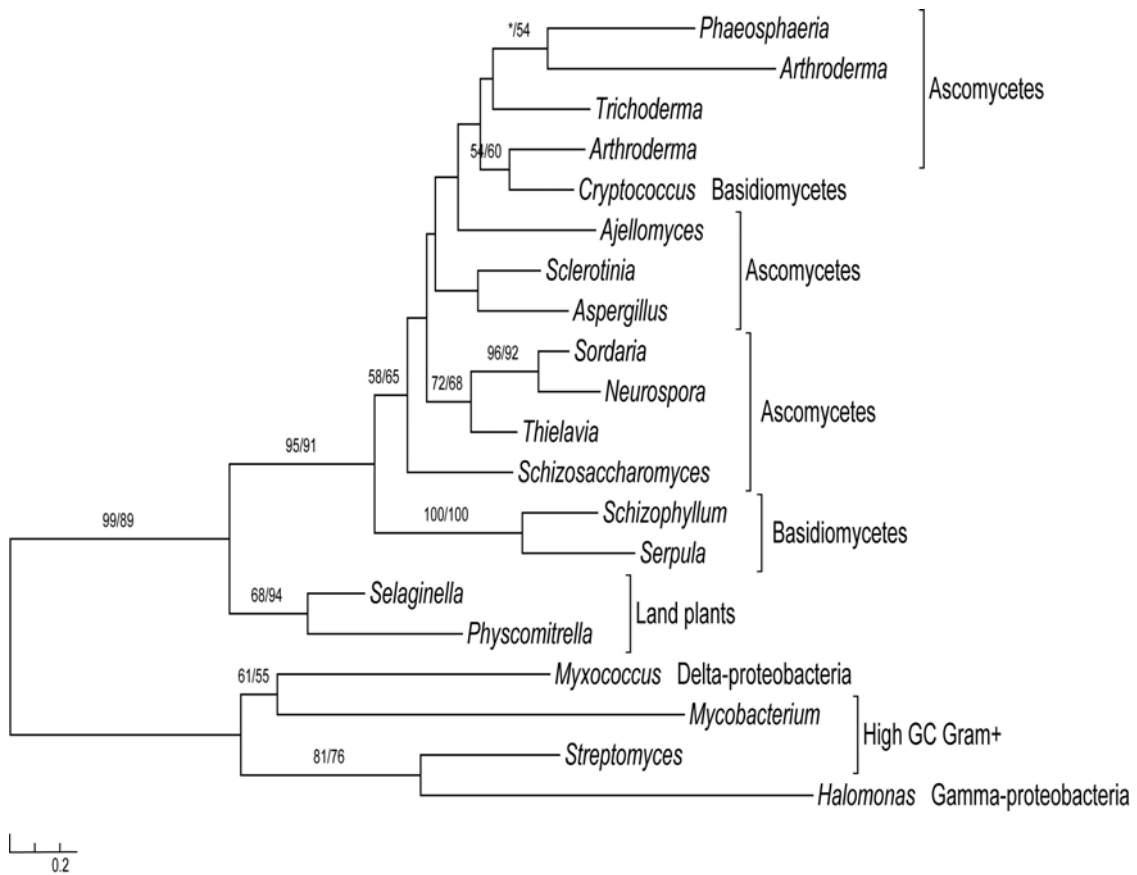

**Supplementary Figure S46. Molecular phylogeny of hemerythrin HHE domain protein.** Identifiable homologs of *Physcomitrella* sequence were only found in club moss, fungi and bacteria. *Physcomitrella* sequence (Genbank GI number 168061715) forms a highly supported clade with club moss sequences, which in turn is related to a fungal sequence clade. It is unclear whether this gene in land plants was acquired from fungi or bacteria.

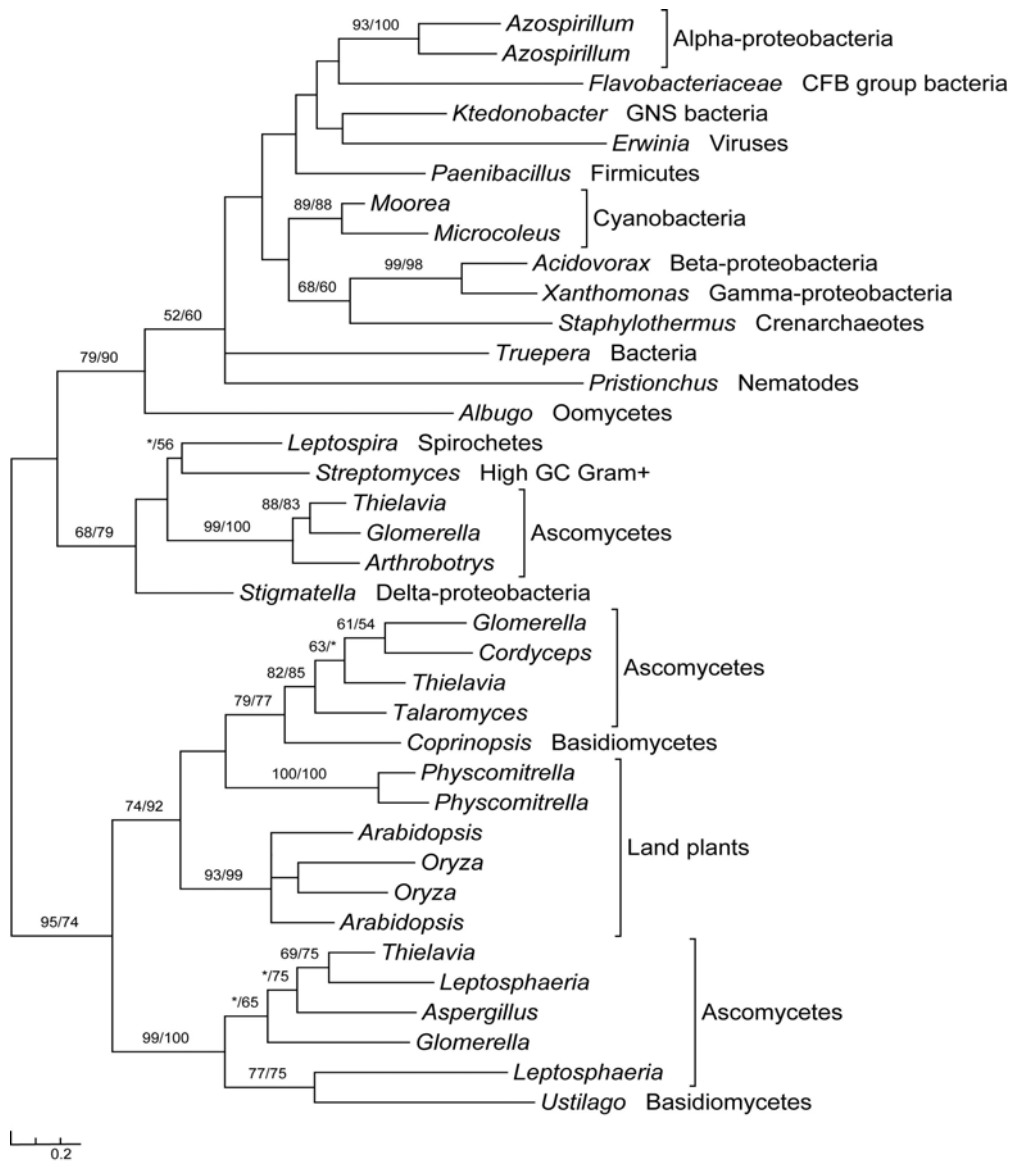

**Supplementary Figure S47. Molecular phylogeny of glycosyl hydrolase family.** *Physcomitrella* sequences (Genbank GI numbers 168029996, 168033792) form a monophyletic group with homologs from other land plants and fungi. Several other eukaryotic sequences group with bacterial homologs. It is unclear whether these sequences are of mitochondrial origin.



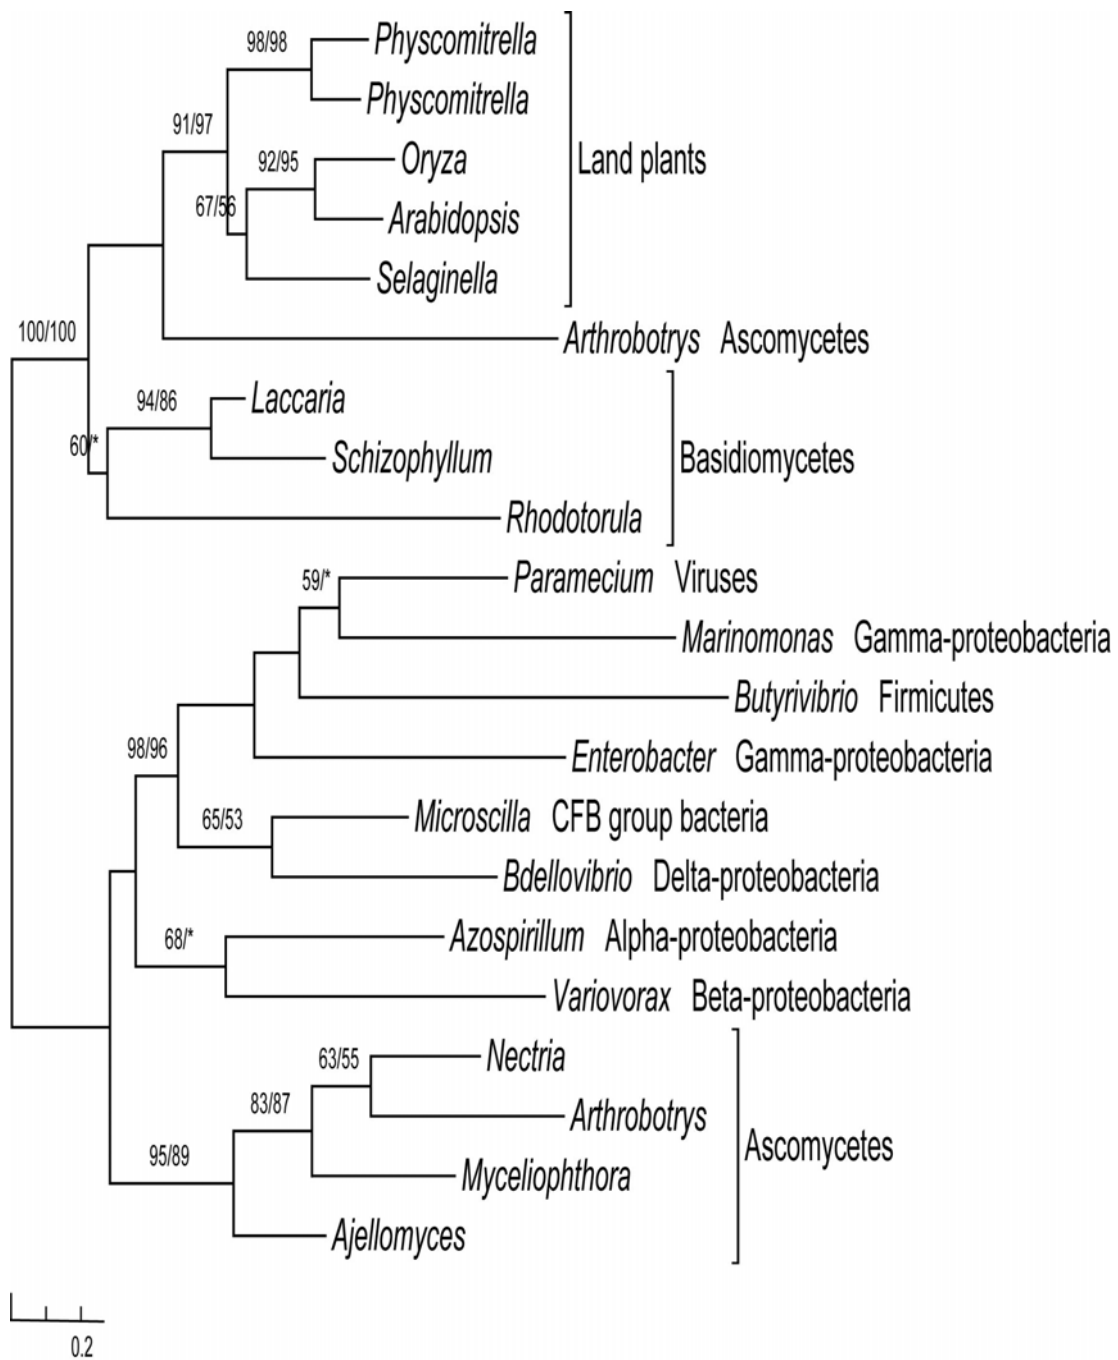

**Supplementary Figure S48. Molecular phylogeny of  $\beta$ -1,4-mannosyl-glycoprotein.** *Physcomitrella* sequences (Genbank GI numbers 168005754, 168016522) form a monophyletic group with other land plant homologs, which in turn groups within the fungal clade.

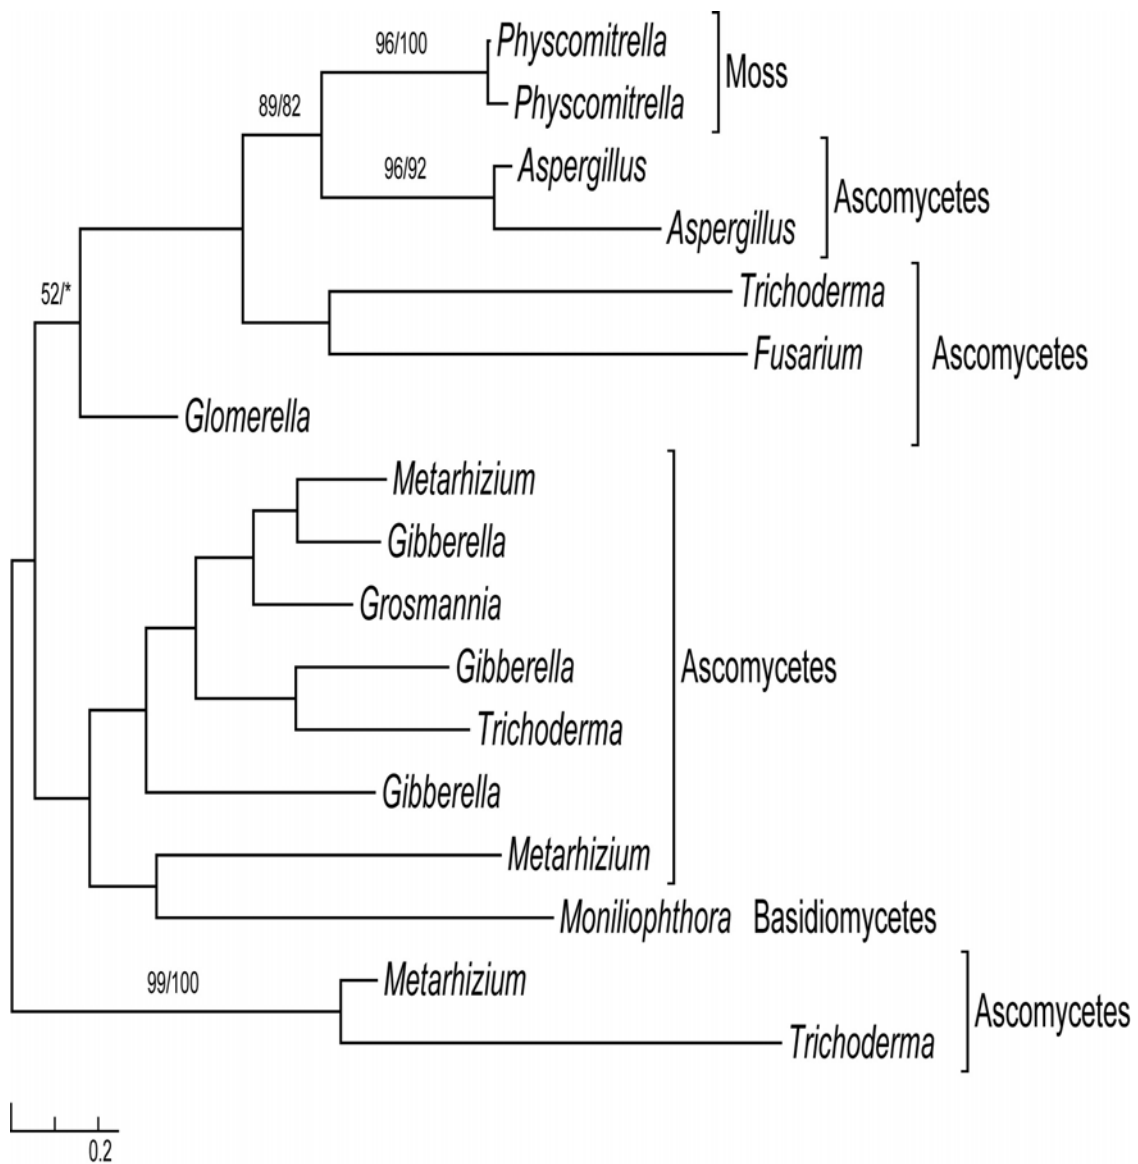

**Supplementary Figure S49. Molecular phylogeny of killer toxin protein (KP4).** Identifiable homologs of *Physcomitrella* sequences (Genbank GI numbers 168050142, 168050096) are only presented in fungi. *Physcomitrella* sequences form a highly support clade with *Aspergillus* homologs. It is likely that *Physcomitrella* acquired this gene from *Aspergillus* or other fungi.

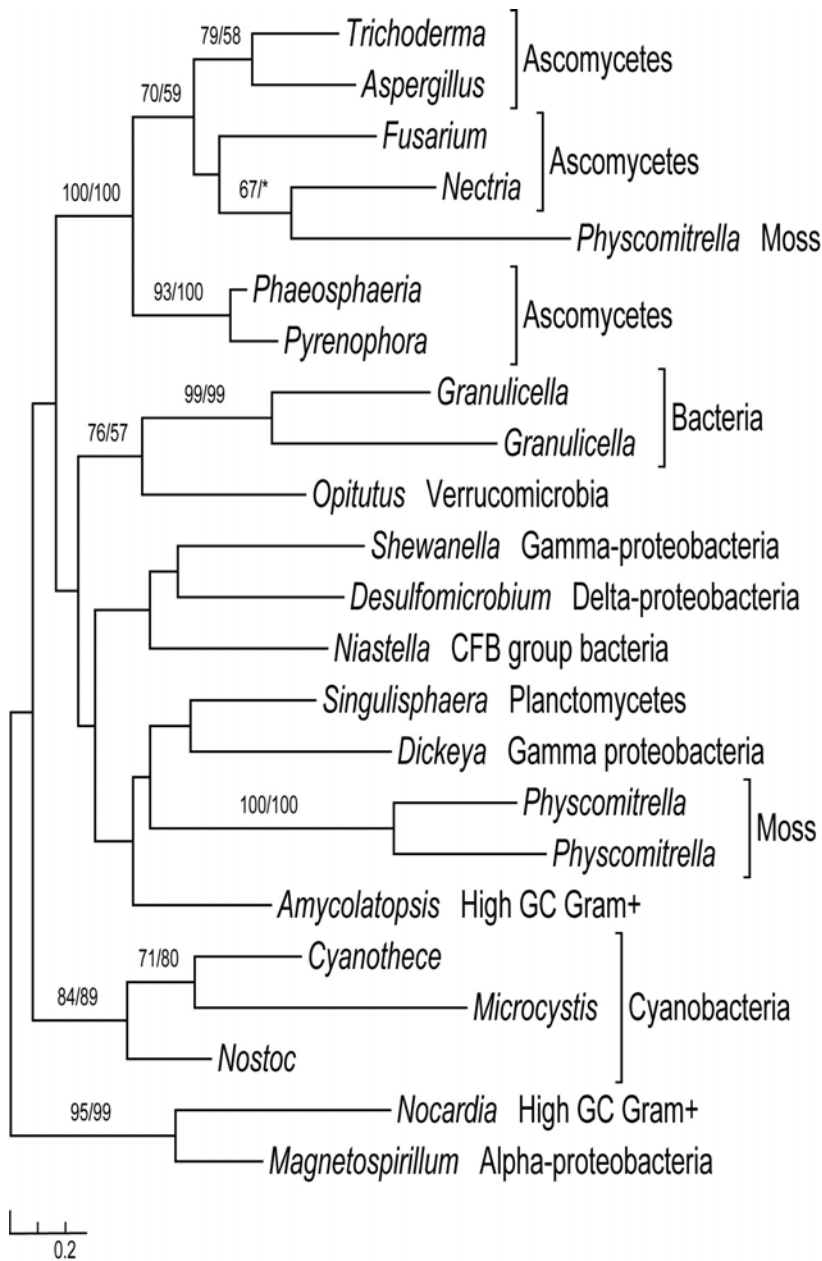

**Supplementary Figure S50. Molecular phylogeny of peptidoglycan binding domain containing protein.** Identifiable homologs of *Physcomitrella* sequences are predominantly found in fungi and bacteria. One *Physcomitrella* sequence (Genbank GI number 168050434) appears to be derived from ascomycetes. Other two moss copies (Genbank GI numbers 168036135, 168019630) group with bacterial homologs but without strong support.

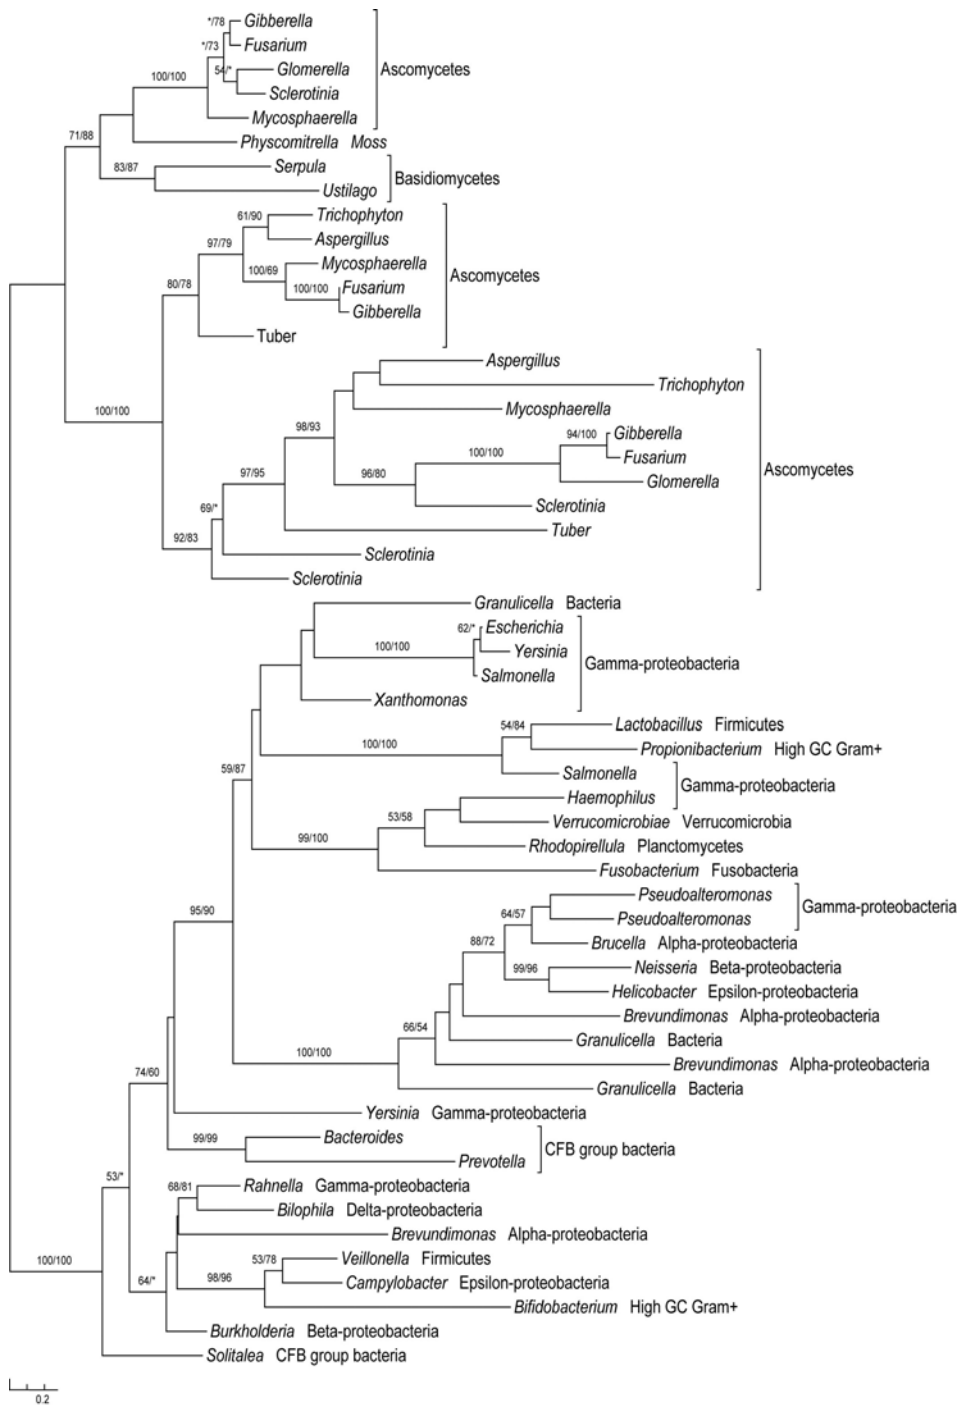

**Supplementary Figure S51. Molecular phylogeny of l-fucose permease.** Identifiable homologs of *Physcomitrella* sequences were only found in fungi and bacteria. *Physcomitrella* sequence (Genbank GI number 167997115) groups within the fungal clade, suggesting that this gene in *Physcomitrella* is likely of fungal origin, which confirms a previous study by Richards et al. (2009).

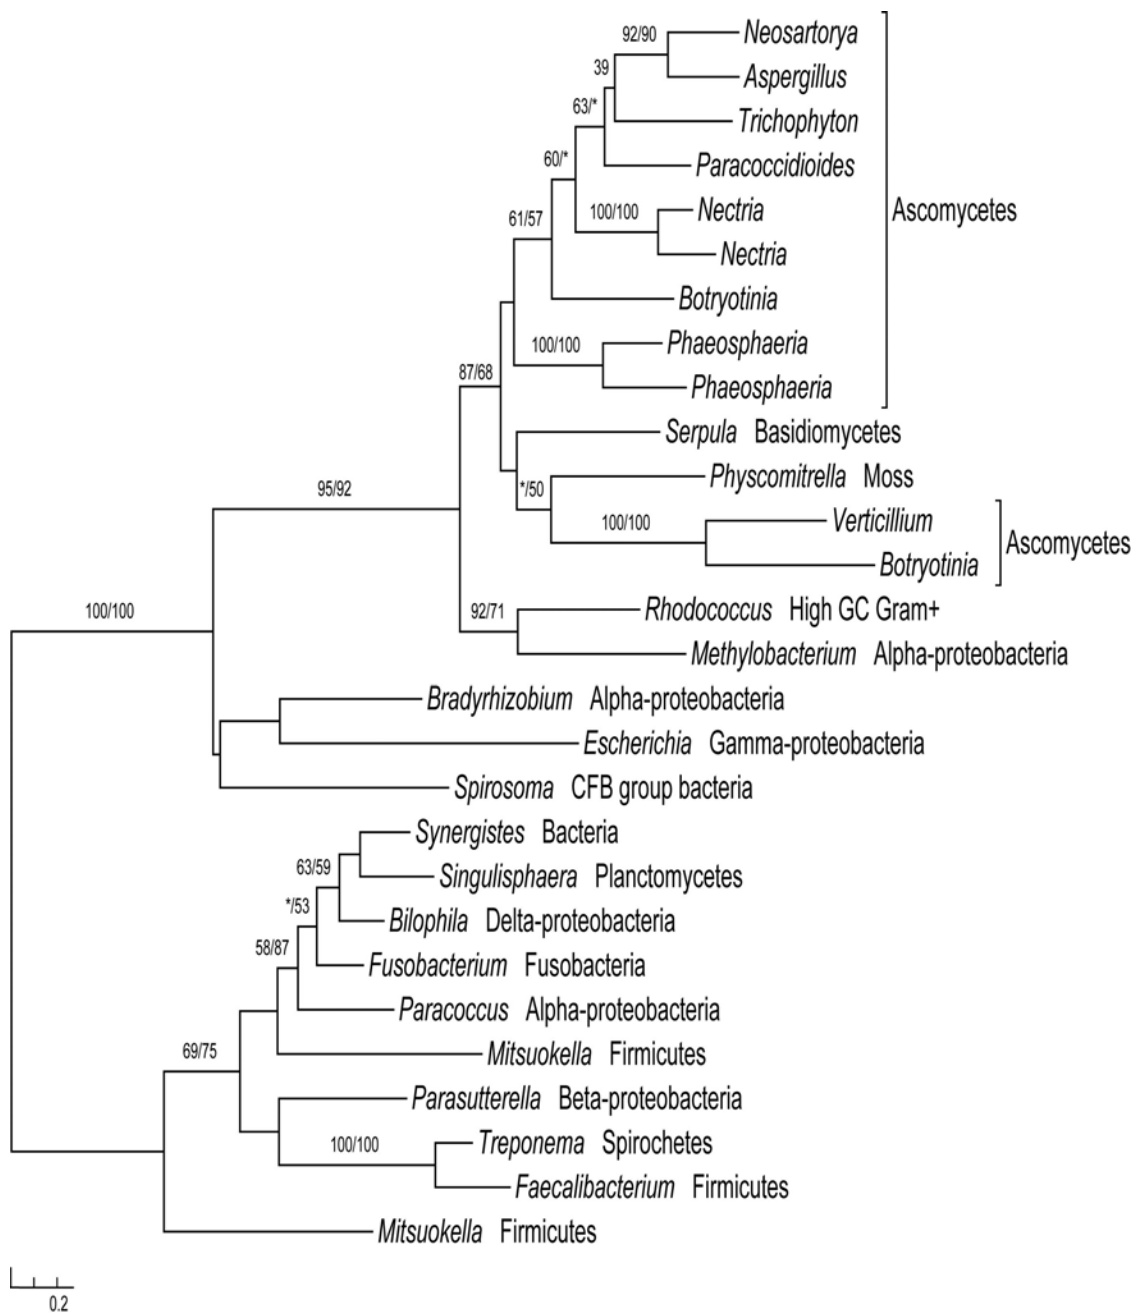

**Supplementary Figure S52. Molecular phylogeny of a hypothetical protein.** Moss sequences (Genbank GI number 168028121) groups within a large fungal clade. Identifiable homologs of *Physcomitrella* were only found in fungi and bacteria. The fungal origin of this moss sequence confirms a previous study by Richards et al. (2009).

**Supplementary Table S1.** Acquired genes identified in *Physcomitrella patens*. Homologs of heterokaryon incompatibility (HET) superfamily were only founded in *P. patens* and fungi. The identification of this gene family was exclusively based on taxonomic distribution and no phylogenetic tree was constructed for this family. Asterisks indicate genes that were also reported by earlier studies. “y” indicates existence of indels shared by potential donors and recipient organisms in multiple sequence alignments.

| Putative gene product             | GI number | Gene function          | Putative donor | Taxonomic distribution | indels | Figure  | Homologous locus in <i>Arabidopsis</i> |
|-----------------------------------|-----------|------------------------|----------------|------------------------|--------|---------|----------------------------------------|
| Subtilase family                  | 168024416 | Proteolysis            | Bacteria       | Land plants            |        | Fig. 1a | AT2G04160                              |
|                                   | 168049684 |                        |                |                        |        |         | AT2G04160                              |
|                                   | 168009784 |                        |                |                        |        |         | AT3G14240                              |
|                                   | 168006037 |                        |                |                        |        |         | AT3G14240                              |
|                                   | 168051252 |                        |                |                        |        |         | AT4G34980                              |
|                                   | 168034558 |                        |                |                        |        |         | AT2G19170                              |
|                                   | 168033556 |                        |                |                        |        |         | AT2G19170                              |
|                                   | 168017764 |                        |                |                        |        |         | AT2G19170                              |
|                                   | 168000855 |                        |                |                        |        |         | AT2G19170                              |
|                                   | 168003990 |                        |                |                        |        |         | AT4G30020                              |
| Arginase                          | 168024860 | Polyamine biosynthesis | Bacteria       | Land plants            | y      | Fig. S3 | AT4G08900                              |
| Acyl-activating enzyme 18 (AAE18) | 168064848 | Auxin biosynthesis     | Bacteria       | Green plants           | y      | Fig. 2b | AT1G55320                              |
|                                   | 168042921 |                        |                |                        |        |         |                                        |
|                                   | 168064660 |                        |                |                        |        |         |                                        |
| YUCCA flavin monooxygenase (YUC3) | 168013839 | Auxin biosynthesis     | Bacteria       | Land plants            | y      | Fig. S4 | AT4G28720                              |
|                                   | 168007310 |                        |                |                        |        |         | AT1G04610                              |
|                                   | 168038243 |                        |                |                        |        |         | AT5G25620                              |
|                                   | 168047840 |                        |                |                        |        |         | AT1G04610                              |
|                                   | 168059684 |                        |                |                        |        |         | AT4G13260                              |

|                                                    |           |                               |                          |              |   |          |             |
|----------------------------------------------------|-----------|-------------------------------|--------------------------|--------------|---|----------|-------------|
| Glutamate-cysteine ligase (GCL)                    | 168009654 | Glutathione synthesis         | Proteobacteria           | Green plants |   | Fig. S5  | AT4G23100   |
|                                                    | 168067242 |                               |                          |              |   |          |             |
|                                                    | 168052608 |                               |                          |              |   |          |             |
| Wound-responsive family protein                    | 168031639 | Defense response              | Bacteria                 | Green plants |   | Fig. S39 | AT1G19660   |
|                                                    | 168046102 |                               |                          |              |   |          | AT1G19660   |
|                                                    | 168006875 |                               |                          |              |   |          | AT1G75380   |
|                                                    | 168012338 |                               |                          |              |   |          | AT1G19660   |
|                                                    | 168023049 |                               |                          |              |   |          | AT1G19660   |
|                                                    | 168014136 |                               |                          |              |   |          | AT1G19660   |
| HAD superfamily, subfamily IIIB acid phosphatase   | 168062119 | Herbivorous insect resistance | Bacteria                 | Land plants  | y | Fig. S42 | AT4G29260   |
|                                                    | 168062518 |                               |                          |              |   |          |             |
|                                                    | 168033997 |                               |                          |              |   |          |             |
|                                                    | 168032668 |                               |                          |              |   |          |             |
| NRPS-like enzyme                                   | 168054351 | Oxidative stress resistance   | Fungi                    | Land plants  |   | Fig. S44 | AT4G18540   |
| N-acetyl-gamma-glutamyl-phosphate reductase (argC) | 168037402 | Cadmium stress response       | $\alpha$ -proteobacteria | Green plants |   | Fig. S43 | AT2G19940   |
|                                                    | 168031643 |                               |                          |              |   |          |             |
| HAD-superfamily hydrolase                          | 168001220 | Cold stress response          | Bacteria                 | Green plants | y | Fig. S18 | AT5G48960   |
| Killer toxin Protein (KP4)                         | 168050142 | Pathogen resistance           | Ascomycetes              | Moss         |   | Fig. S49 | no homology |
|                                                    | 168050096 |                               |                          |              |   |          |             |
| Flotillin-like protein                             | 168017323 | Endocytosis                   | Ascomycetes              | Land plants  |   | Fig. S45 | AT5G25260   |
| Allantoate amidohydrolase (AAH)                    | 167997139 | Purine degradation            | Bacteria                 | Green plants | y | Fig. S7  | AT4G20070   |
|                                                    | 168064079 |                               |                          |              |   |          |             |
| Ureidoglycolate amidohydrolase (UAH)               | 168010247 | Purine degradation            | Bacteria                 | Green plants |   | Fig. S7  | AT5G43600   |
| Guanine deaminase (GDA)                            | 168025229 | Purine degradation            | $\alpha$ -proteobacteria | Moss         | y | Fig. S6  | no homology |

|                                                      |           |                                    |                          |              |   |          |             |
|------------------------------------------------------|-----------|------------------------------------|--------------------------|--------------|---|----------|-------------|
| PfkB family kinase                                   | 167998254 | Vitamin B6 salvaging               | $\delta$ -proteobacteria | Land plants  |   | Fig. S36 | AT5G58730   |
|                                                      | 168016595 |                                    |                          |              |   |          |             |
|                                                      | 168021833 |                                    |                          |              |   |          |             |
| Methionine gamma-lyase (MGL)                         | 168013924 | L-methionine degradation           | CFB bacteria             | Green plants | y | Fig. S20 | AT1G64660   |
|                                                      | 168008405 |                                    |                          |              |   |          |             |
| Glutamine synthetase (GS)                            | 168040136 | Glutamine biosynthesis             | CFB bacteria             | Moss         |   | Fig. S8  | no homology |
| 3,4-dihydroxy-2-butanone 4-phosphate synthase (ribB) | 168028296 | Riboflavin biosynthesis            | Euryarchaeotes           | Land plants  | y | Fig. S13 | no homology |
| Hemerythrin HHE domain protein                       | 168061715 | Iron homeostasis                   | Ascomycetes              | Land plants  |   | Fig. S46 | no homology |
| Hydroxypyruvate reductase 2 (HPR2)                   | 167997717 | Photorespiratory                   | Bacteria                 | Land plants  | y | Fig. S26 | AT1G79870   |
|                                                      | 168037243 |                                    |                          |              |   |          |             |
| Inositol 2-dehydrogenase like protein                | 168003329 | Pollen germination and tube growth | $\alpha$ -proteobacteria | Land plants  | y | Fig. S27 | AT4G17370   |
| Peptidoglycan binding domain containing protein      | 168050434 | Peptidoglycan binding              | Ascomycetes              | Moss         |   | Fig. S50 | no homology |
| Sugar isomerase (SIS) family                         | 168059735 | Sugar binding                      | $\alpha$ -proteobacteria | Green plants |   | Fig. S14 | AT5G52190   |
|                                                      | 168019301 |                                    |                          |              |   |          |             |
| Limit dextrinase (LDA)                               | 168038552 | Starch biosynthesis                | Bacteria                 | Green plants | y | Fig. S14 | AT5G04360   |
| $\beta$ -glucosidase                                 | 168069539 | Cellulose degradation              | Bacteria                 | Land plants  | y | Fig. S15 | AT5G04885   |
|                                                      | 168059435 |                                    |                          |              |   |          | AT5G20950   |
| Gycosyl hydrolase family                             | 168029996 | Carbohydrate methabolism           | Ascomycetes              | Land plants  |   | Fig. S47 | AT1G13130   |
|                                                      | 168033792 |                                    |                          |              |   |          | AT3G26140   |
| Glycoside hydrolase                                  | 168052263 | Carbohydrate methabolism           | $\delta$ -proteobacteria | Moss         |   | Fig. S23 | no homology |



|                                                      |           |                                  |                          |              |   |          |             |
|------------------------------------------------------|-----------|----------------------------------|--------------------------|--------------|---|----------|-------------|
| Glycoside hydrolase family 2                         | 168036598 | Carbohydrate methabolism         | $\gamma$ -proteobacteria | Green plants |   | Fig. S25 | AT3G54440   |
| $\alpha$ -L-rhamnosidase                             | 168031461 | Carbohydrate methabolism         | CFB bacteria             | Moss         |   | Fig. S33 | no homology |
| FAD linked oxidase                                   | 168012414 | Oxygen-dependent oxidoreductases | CFB bacteria             | Moss         |   | Fig. S1  | no homology |
|                                                      | 168045341 |                                  |                          |              |   |          |             |
| Short-chain dehydrogenase/reductase SDR              | 168031790 | Oxidation-reduction              | Proteobacteria           | Moss         |   | Fig. S28 | no homology |
| Fatty acyl-ACP thioesterases B (FATB)                | 167998911 | Fatty acid biosynthesis          | Bacteria                 | Green plants |   | Fig. S41 | AT1G08510   |
|                                                      | 168035219 |                                  |                          |              |   |          | AT1G08510   |
|                                                      | 168024004 |                                  |                          |              |   |          | AT1G08510   |
|                                                      | 168044508 |                                  |                          |              |   |          | AT1G08510   |
|                                                      | 168036485 |                                  |                          |              |   |          | AT4G13050   |
| 1,4-dihydroxy-2-naphthoate octaprenyltransferase     | 168009868 | Menaquinone biosynthesis         | $\delta$ -proteobacteria | Moss         |   | Fig. S37 | no homology |
| Phosphoenolpyruvate carboxylase (PEPCase)            | 168029489 | Carbon fixation                  | $\gamma$ -proteobacteria | Moss         |   | Fig. S2  | no homology |
| GroES-like zinc-binding alcohol dehydrogenase family | 168030245 | Glycolysis                       | High GC gram+            | Land plants  | y | Fig. S16 | AT5G63620   |
| Pyruvate kinase                                      | 168053775 | Glycolysis                       | Bacteria                 | Land plants  | y | Fig. S21 | AT3G49160   |
|                                                      | 168053903 |                                  |                          |              |   |          |             |
| Phosphoglycerate kinase (PGK)                        | 168058081 | Glycolysis                       | $\delta$ -proteobacteria | Land plants  | y | Fig.S17  | no homology |
|                                                      | 168034630 |                                  |                          |              |   |          |             |
| ATP-binding cassette I1 (ABC11) transporter          | 168004297 | Molecular transport              | Bacteria                 | Land plants  | y | Fig. S29 | AT1G63270   |
| Uracil permease                                      | 168012184 | Nucleobase transport             | Bacteria                 | Green plants | y | Fig. S30 | AT5G03555   |

|                                           |           |                            |                         |              |   |          |             |
|-------------------------------------------|-----------|----------------------------|-------------------------|--------------|---|----------|-------------|
|                                           | 168043133 |                            |                         |              |   |          |             |
| L-fucose permease*                        | 167997115 | Sugar transport            | Ascomycetes             | Moss         |   | Fig. S51 | no homology |
| β-1,4-mannosyl-glycoprotein               | 168005754 | Glycosyl transferring      | Basidiomycetes          | Land plants  |   | Fig. S48 | AT5G14480   |
|                                           | 168016522 |                            |                         |              |   |          |             |
| DNA repair family protein                 | 168044851 | DNA replication            | Ascomycetes             | Moss         |   | Fig. S12 | no homology |
| Toprim domain-containing protein          | 168040643 | DNA replication            | Bacteria                | Green plants | y | Fig. S9  | AT1G30680   |
| DNA topoisomerase I                       | 168037859 | DNA replication            | Proteobacteria          | Green plants | y | Fig. S10 | AT4G31210   |
| phage/plasmid primase, P4 family          | 168026035 | DNA replication            | Viruses                 | Moss         |   | Fig. S11 | no homology |
|                                           | 168057313 |                            |                         |              |   |          |             |
|                                           | 168032336 |                            |                         |              |   |          |             |
|                                           | 168009191 |                            |                         |              |   |          |             |
|                                           | 168041210 |                            |                         |              |   |          |             |
| Ribosomal protein S6                      | 162662263 | RNA binding                | β-proteobacteria        | Moss         |   | Fig. S40 | no homology |
| M6 family peptidase                       | 168013514 | Peptidase activity         | Bacteria                | Moss         |   | Fig. S35 | no homology |
|                                           | 168019010 |                            |                         |              |   |          |             |
|                                           | 168032091 |                            |                         |              |   |          |             |
|                                           | 168048759 |                            |                         |              |   |          |             |
| Amidohydrolase family                     | 168021897 | Hydrolase activity         | Bacteria                | Land plants  | y | Fig. S31 | no homology |
| Amidase family protein                    | 168042262 | Acrylonitrile metabolism   | Bacteria                | Green plants | y | Fig. S32 | AT5G07360   |
|                                           | 168003211 |                            |                         |              |   |          |             |
| D-alanine-D-alanine ligase family         | 168012025 | Peptidoglycan biosynthesis | Chlamydiae/CFB bacteria | Green plants |   | Fig. S34 | AT3G08840   |
| Dienelactone hydrolase family             | 168063002 | Hydrolase activity         | Bacteria                | Moss         |   | Fig. S38 | no homology |
| Vein Patterning 1 (VEP1)                  | 168003008 | Vascular development       | Bacteria                | Land plants  | y | Fig. 1b  | AT4G24220   |
| Heterokaryon incompatibility (HET) family | 168037338 | Heterokaryon formation     | Fungi                   | Moss         |   | No fig   | no homology |
|                                           | 168042194 |                            |                         |              |   |          |             |

|                            |           |         |                          |              |   |          |             |
|----------------------------|-----------|---------|--------------------------|--------------|---|----------|-------------|
|                            | 168042266 |         |                          |              |   |          |             |
|                            | 168042178 |         |                          |              |   |          |             |
|                            | 168043854 |         |                          |              |   |          |             |
|                            | 168066323 |         |                          |              |   |          |             |
|                            | 168042180 |         |                          |              |   |          |             |
|                            | 168041122 |         |                          |              |   |          |             |
|                            | 168043902 |         |                          |              |   |          |             |
|                            | 168043828 |         |                          |              |   |          |             |
|                            | 168042274 |         |                          |              |   |          |             |
|                            | 168041824 |         |                          |              |   |          |             |
|                            | 168007634 |         |                          |              |   |          |             |
|                            | 168043856 |         |                          |              |   |          |             |
|                            | 168042184 |         |                          |              |   |          |             |
|                            | 168042182 |         |                          |              |   |          |             |
|                            | 168015126 |         |                          |              |   |          |             |
|                            | 168049214 |         |                          |              |   |          |             |
|                            | 168062785 |         |                          |              |   |          |             |
|                            | 168057911 |         |                          |              |   |          |             |
| ybiU protein               | 168021919 | Unknown | High GC gram+            | Moss         | y | Fig. S22 | no homology |
| Acyl-CoA N-acyltransferase | 168042611 | Unknown | $\alpha$ -proteobacteria | Green plants |   | Fig. S19 | At2g23390   |
| Hypothetical protein*      | 168028121 | Unknown | Ascomycetes              | Moss         |   | Fig. S52 | no homology |

**Supplementary Table S2.** Sources of additional sequences used for database construction.

| <b>Species</b>                      | <b>Taxonomic group</b> | <b>Data type</b> | <b>Taxid</b> |
|-------------------------------------|------------------------|------------------|--------------|
| <i>Acanthamoeba castellanii</i>     | Amoebozoa              | EST              | 5755         |
| <i>Acetabularia acetabulum</i>      | Viridiplantae          | EST              | 35845        |
| <i>Alexandrium tamarense</i>        | Alveolata              | Genome           | 2925         |
| <i>Allomyces macrogynus</i>         | Fungi                  | EST              | 28583        |
| <i>Amphidinium carterae</i>         | Alveolata              | Genome           | 2961         |
| <i>Antonospora locustae</i>         | Fungi                  | EST              | 278021       |
| <i>Astasia longa</i>                | Fungi                  | EST              | 3037         |
| <i>Barachionus plicatilis</i>       | Metazoa                | Genome           | 10195        |
| <i>Bigelowiella natans</i>          | Rhizaria               | Genome           | 227086       |
| <i>Capitella teleta</i>             | Metazoa                | Genome           | 283909       |
| <i>Chlorella vulgaris</i>           | Viridiplantae          | Genome           | 3077         |
| <i>Cyanidioschyzon merolae</i>      | Eukaryota              | EST              | 45157        |
| <i>Cyanophora paradoxa</i>          | Glaucocestophyceae     | EST              | 2762         |
| <i>Diplonema papillatum</i>         | Diplonemida            | Genome           | 91374        |
| <i>Emiliana huxleyi</i>             | Eukaryota              | Genome           | 2903         |
| <i>Euglena gracilis</i>             | Euglenozoa             | EST              | 3039         |
| <i>Glaucocestis nostochinearum</i>  | Glaucocestophyceae     | Genome           | 38271        |
| <i>Guillardia theta</i>             | Cryptophyta            | EST              | 55529        |
| <i>Hartmannella vermiformis</i>     | Amoebozoa              | EST              | 5778         |
| <i>Heterocapsa triquetra</i>        | Alveolata              | EST              | 66468        |
| <i>Histiona aroides</i>             | Jakobida               | EST              | 392300       |
| <i>Hyperamoeba dachnya</i>          | Amoebozoa              | EST              | 181200       |
| <i>Isochrysis galbana_CCMP_1323</i> | Haptophyceae           | EST              | 37099        |
| <i>Jakoba bahamiensis</i>           | Excavata               | EST              | 221721       |
| <i>Jakoba libera</i>                | Excavata               | EST              | 143017       |
| <i>Karenia brevis</i>               | Alveolata              | EST              | 156230       |
| <i>Karlodinium micrum</i>           | Alveolata              | Genome           | 342587       |
| <i>Lottia gigantea</i>              | Metazoa                | EST              | 225164       |
| <i>Malawimonas californiana</i>     | Excavata               | EST              | 221722       |
| <i>Mastigamoeba balamuthi</i>       | Amoebozoa              | EST              | 108607       |
| <i>Mesostigma viride</i>            | Viridiplantae          | Genome           | 41882        |
| <i>Mortierella verticillata</i>     | Fungi                  | EST              | 78898        |
| <i>Neocallimastix patriciarum</i>   | Fungi                  | EST              | 4758         |
| <i>Nephroselmis olivacea</i>        | Viridiplantae          | EST              | 31312        |
| <i>Nuclearia simplex_strain_2</i>   | Opisthokonta           | EST              | 154970       |
| <i>Oxytricha trifallax</i>          | Alveolata              | EST              | 94289        |

|                                    |                  |        |        |
|------------------------------------|------------------|--------|--------|
| <i>Paracercomonas marina</i>       | Rhizaria         | EST    | 372086 |
| <i>Pavlova lutheri</i>             | Haptophyceae     | EST    | 2832   |
| <i>Physarum polycephalum</i>       | Amoebozoa        | Genome | 5791   |
| <i>Phytophthora ramorum</i>        | Stramenopiles    | Genome | 164328 |
| <i>Polysphondylium pallidum</i>    | Amoebozoa        | EST    | 13642  |
| <i>Polytomella parva</i>           | Viridiplantae    | EST    | 51329  |
| <i>Porphyra yezoensis</i>          | Rhodophyta       | EST    | 2788   |
| <i>Proterospongia choanojuncta</i> | Choanoflagellida | EST    | 218848 |
| <i>Prototheca wickerhamii</i>      | Viridiplantae    | EST    | 3111   |
| <i>Reclinomonas americana</i>      | Jakobida         | Genome | 48483  |
| <i>Rhizopus oryzae</i>             | Fungi            | EST    | 64495  |
| <i>Saitoella complicata</i>        | Fungi            | Genome | 5606   |
| <i>Sawyeria marylandensis</i>      | Heterolobosea    | EST    | 194530 |
| <i>Scenedesmus obliquus</i>        | Viridiplantae    | EST    | 3088   |
| <i>Seculamonas ecuadoriensis</i>   | Jakobida         | Genome | 221724 |
| <i>Sphaeroforma arctica</i>        | Opisthokonta     | EST    | 72019  |
| <i>Spironucleus vortens</i>        | Formicata        | Genome | 58336  |
| <i>Spizellomyces punctatus</i>     | Fungi            | EST    | 109760 |
| <i>Stachyamoeba lipophora</i>      | Heterolobosea    | EST    | 463046 |
| <i>Streblomastix strix</i>         | Oxymonadida      | EST    | 222440 |
| <i>Taphrina deformans</i>          | Fungi            | EST    | 5011   |
| <i>Tetrahymena thermophila</i>     | Alveolata        | Genome | 5911   |
| <i>Thecamonas trahens</i>          | Eukaryota        | EST    | 529818 |

---
